# Supplementary material
Source: PubMed Central journal article supplement (PMC3289549)

## Supporting Information

# Reduced-Amide Inhibitor of Pin1 Binds in a Conformation Resembling a Twisted-Amide Transition State<sup>†</sup>

Guoyan G. Xu;<sup>1</sup> Yan Zhang;<sup>\*2</sup> Ana Y. Mercedes-Camacho;<sup>1</sup> Felicia A. Etzkorn<sup>\*1</sup>

<sup>1</sup>Department of Chemistry, Virginia Tech, Blacksburg, Virginia 24061; <sup>2</sup>Department of Chemistry and Biochemistry, University of Texas, Austin, TX 78712

\*Corresponding authors: Telephone: 540-231-2235, Fax: 540-231-3255, E-mail:

[fetzkorn@vt.edu](mailto:fetzkorn@vt.edu), Telephone: 512-471-8645, Fax: 512-471-8696; E-mail:

[jeszhang@mail.utexas.edu](mailto:jeszhang@mail.utexas.edu).

**Synthesis of Reduced Amide Inhibitors.** The key step in the synthesis of **1** was selective reduction of the amide in the presence of both an ester and a carbamate (Scheme S1). (1, 2) Fmoc-Ser(*t*-Bu)-OH was coupled to H-Pro-*Ot*-Bu to form amide **5** using 1-ethyl-3-(3-dimethylaminopropyl)-carbodiimide (EDC) (Scheme 1). Amide **5** was reduced selectively with borane to form the reduced amide **6**. Both *t*-Bu groups were removed with BF<sub>3</sub>·Et<sub>2</sub>O to form intermediate **7**, although the deprotection has only been reported for a *t*-Bu ester. (3) Acid **7**, with the unprotected alcohol side chain, was coupled selectively to tryptamine using EDC, 1-hydroxy-7-azabenzotriazole (HOAt), (4) and DMAP to give amide **8** in 80% yield.

---

<sup>†</sup> *Accession Codes:* Coordinates and structure factors have been deposited in the Protein Data Bank. PDB accession code: Pin1-inhibitor **2** complex, 3NTP. We thank the NIH for financial support from Grant No. R01 CA110940 (FAE), S10 RR16658 (FAE) for the LC-MSMS, and the Welch Foundation for Grant F-1778 (YZ).

Phosphorylation to give **9** was accomplished with di-*tert*-butyl diisopropyl phosphoramidite, followed by oxidation with *tert*-butyl hydroperoxide.(5, 6) Deprotection with TFA released the final phosphorylated Pin1 inhibitor **1**. Inhibitors **2**, **3**, **4a**, and **4b** were synthesized by similar procedures (Schemes S2, S3, and S4).

**Scheme 1. Synthesis of reduced amide 1.**

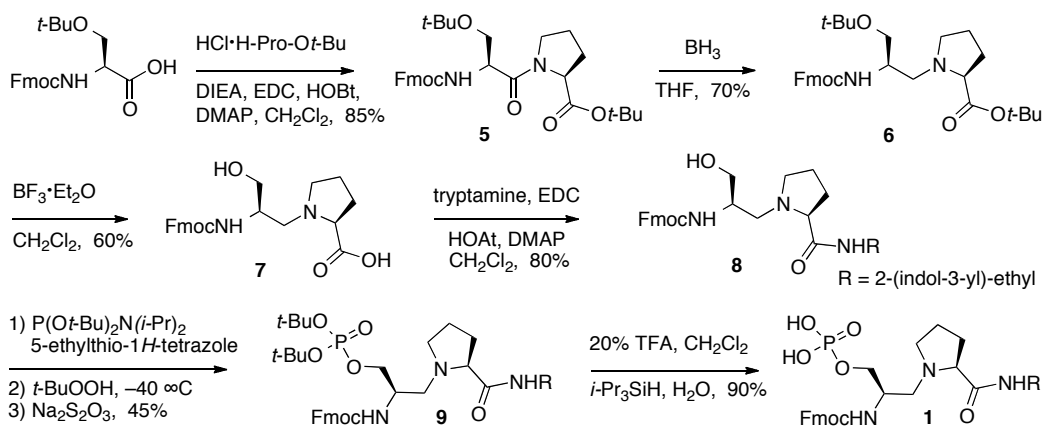

**General Procedures.** Unless otherwise indicated, all reactions were carried out under N<sub>2</sub> in flame-dried glassware. THF was distilled from Na-benzophenone, and CH<sub>2</sub>Cl<sub>2</sub> was dried by passage through dry alumina. Anhydrous DMF (99.8%), MeOH, and DIEA were used directly from sealed bottles. Trifluoroethanol (TFE, 99+%) was distilled from Na before use. LiCl (99+%) was dried under vacuum at 150 °C for 24 h. NaHCO<sub>3</sub>, NH<sub>4</sub>Cl, and brine (NaCl) refer to saturated aqueous solutions unless otherwise noted. Chromatography refers to the flash method of Still et al.(7) performed on 230–400 mesh silica gel with reagent grade solvents as % (v/v). <sup>1</sup>H, <sup>13</sup>C, and <sup>31</sup>P NMR spectra were obtained at 500, 125, and 162 MHz, respectively, at ambient temperature in CDCl<sub>3</sub> unless otherwise noted. Chemical shifts are reported in parts per million

(ppm) downfield from tetramethylsilane (TMS). Data are reported as follows: chemical shift, multiplicity: singlet (s), doublet (d), triplet (t), quadruplet (q), quintuplet (qt), multiplet (m), coupling constants  $J$  in Hz, and integration. In  $^{13}\text{C}$  NMR spectral listings, minor rotamers are labeled (m). Analytical HPLC (Anal. HPLC): normal phase (NP-HPLC) were obtained on a MetaSil AQ  $5\mu\text{ SiO}_2$ ,  $4.6 \times 50$  mm column, 5% *i*-PrOH/hexanes (v/v) isocratic, flow rate  $1.0\text{ mL min}^{-1}$ , unless otherwise noted. Reverse phase (RP-HPLC) were obtained on a C18  $4.6 \times 50$  mm column, with 10%  $\text{CH}_3\text{CN}/\text{H}_2\text{O}$  for 3 min, then 10 to 90%  $\text{CH}_3\text{CN}/\text{H}_2\text{O}$  gradient over 6 min, held at 90% for 9 min, flow rate  $1.0\text{ mL min}^{-1}$ , with UV detection, unless otherwise noted. Anal. HPLC results are listed as: retention time (min), purity (%).

**Fmoc-Ser(OtBu)-Pro-OtBu, 5.** A solution of DIEA (1.0 g, 7.8 mmol) and  $\text{HCl}\cdot\text{H-Pro-OtBu}$  (1.3 g, 5.3 mmol) in DMF (5 mL) was added to a solution of Fmoc-Ser(OtBu)-OH (2.0 g, 5.2 mmol), EDC (1.2 g, 6.3 mmol), and HOBt (1.0 g, 6.3 mmol) in DMF (15 mL). The mixture was stirred at rt for 14 h, then diluted with EtOAc (80 mL), and washed with 1 M HCl (30 mL), and 5% aq  $\text{NaHCO}_3$  (20 mL). The organic layer was dried over  $\text{Na}_2\text{SO}_4$ , filtered, and evaporated. The crude product was purified by chromatography with 30 to 50% EtOAc/hexanes to yield **5** (2.0 g, 80%) as a colorless oil. Anal. HPLC: 254 nm, 2.0 min, 98%.  $[\alpha]_D^{25} = -48.6$  ( $c$  1, MeOH).  $^1\text{H}$  NMR:  $\delta$  7.74 (d,  $J = 7.2$ , 2H), 7.59 (d,  $J = 6.9$ , 2H), 7.38 (t,  $J = 7.6$ , 2H), 7.27 (m, 2H), 5.74 (d,  $J = 7.7$ , 0.4H), 5.71 (d,  $J = 8.0$ , 0.6H), 4.92 (dd,  $J = 1.6$ , 8.3, 0.4H), 4.65 (dt,  $J = 6.4$ , 8.2, 0.6H), 4.51 (ddd,  $J = 4.9$ , 7.8, 10.1, 0.4H), 4.35 (m, 2.4H), 4.19 (dd,  $J = 7.7$ , 15.9, 1H), 3.85 (ddd,  $J = 5.2$ , 7.5, 9.7, 0.6H), 3.65 (m, 1.4H), 3.58 (dd,  $J = 4.7$ , 6.4, 1H), 3.52 (m, 0.6H), 3.36 (dd,  $J = 8.4$ ,

10.0, 0.6H), 2.23 (m, 1H), 2.12 (m, 2H), 1.90 (m, 2H), 1.46 (s, 5H), 1.42 (s, 4H), 1.20 (s, 5H), 1.13 (s, 4H).  $^{13}\text{C}$  NMR:  $\delta$  171.1 (m), 170.9, 170.2 (m), 169.3, 156.0, 155.3 (m), 144.01 (m), 143.99, 143.90, 143.87 (m), 141.31 (m), 141.30, 127.7, 127.1 (m), 125.24, 125.21 (m), 119.99 (m), 119.98, 82.5 (m), 81.1, 73.7 (m), 73.6, 67.1, 67.0 (m), 64.0 (m), 62.8, 59.93 (m), 59.89, 53.1, 52.7 (m), 47.3, 47.17 (m), 47.16, 46.3 (m), 30.7 (m), 29.1, 28.0, 27.9 (m), 27.4 (m), 27.3, 24.8 (m), 22.5. HRMS (FAB<sup>+</sup>): calcd for  $\text{C}_{31}\text{H}_{41}\text{N}_2\text{O}_6$   $[\text{M} + \text{H}]^+$   $m/z = 537.2965$ , found  $m/z = 537.2979$ .

**Fmoc-Ser(OtBu)- $\Psi$ [CH<sub>2</sub>N]-Pro-OtBu, 6.** Fmoc-Ser(OtBu)-Pro-OtBu **5** (1.27 g, 2.37 mmol) in dry THF (10 mL) was added to a solution of borane (1.00 M in THF, 3.94 mL, 3.94 mmol) at 0 °C over a period of 15 min. The mixture was stirred at rt for 24 h, cooled to 0 °C, and MeOH (5 mL) was added slowly. The solvents were evaporated, and the residue was purified by chromatography (step gradient: 0 then 25% EtOAc/hexanes) to yield **6** (1.26 g, 65%) as a colorless oil. Anal. HPLC: 210 nm, 2.0 min, 95%.  $[\alpha]_{\text{D}}^{25} = -27.0$  ( $c$  1, MeOH).  $^1\text{H}$  NMR:  $\delta$  7.75 (d,  $J = 7.5$ , 2H), 7.66 (t,  $J = 6.6$ , 2H), 7.39 (t,  $J = 7.4$ , 2H), 7.29 (tt,  $J = 1.4, 7.4$ , 2H), 5.96 (d,  $J = 6.0$ , 1H), 4.34 (m, 2H), 4.24 (t,  $J = 7.1$ , 1H), 3.74 (m, 1H), 3.59 (m, 1H), 3.41 (m, 1H), 3.21 (m, 2H), 2.80 (m, 2H), 2.59 (d,  $J = 6.5$ , 1H), 2.06 (m, 1H), 1.85 (m, 3H), 1.47 (s, 9H), 1.19 (s, 9H).  $^{13}\text{C}$  NMR:  $\delta$  174.2, 156.3, 144.2, 141.3, 127.6, 127.0, 125.3, 120.0, 80.7, 73.0, 67.5, 66.6, 61.2, 55.5, 54.7, 51.0, 47.4, 29.6, 28.1, 27.6, 23.9. HRMS (FAB<sup>+</sup>): calcd for  $\text{C}_{31}\text{H}_{43}\text{N}_2\text{O}_5$   $[\text{M} + \text{H}]^+$   $m/z = 523.3172$ , found  $m/z = 523.3169$ .

**Fmoc-Ser-Ψ[CH<sub>2</sub>N]-Pro-2-(indol-3-yl)-ethylamine, 8.** Fmoc-Ser(OtBu)-Ψ[CH<sub>2</sub>N]-Pro-OtBu **6** (250 mg, 4.78 mmol) was dissolved in CH<sub>2</sub>Cl<sub>2</sub> (8 mL), and BF<sub>3</sub>·Et<sub>2</sub>O (0.8 mL, 6.3 mmol) was added. The reaction mixture was stirred at rt for 20 min. After evaporation, the residue was purified by chromatography (gradient: 10 to 25% of MeOH/CH<sub>2</sub>Cl<sub>2</sub>) to yield **7** (108 mg, 55%) as a colorless oil. HRMS: calcd for C<sub>23</sub>H<sub>27</sub>N<sub>2</sub>O<sub>5</sub> [M + H]<sup>+</sup> m/z = 411.1920, found m/z = 411.1932. Fmoc-Ser-Ψ[CH<sub>2</sub>N]-Pro-OH **7** (55 mg, 0.13 mmol), tryptamine (26 mg, 0.16 mmol), HOAt (25 mg, 0.16 mmol), and DMAP (5.0 mg, 0.04 mmol) were dissolved in DMF (3 mL), and EDC (31 mg, 0.16 mmol) was added. The reaction mixture was stirred at rt for 14 h, then diluted with EtOAc (50 mL) and washed with water (25 mL × 3), followed by brine (15 mL). The organic layer was dried over Na<sub>2</sub>SO<sub>4</sub>. After filtration and evaporation, the residue was purified by chromatography using 9% MeOH/EtOAc to yield **8** as a colorless oil (35 mg, 47%). [α]<sub>D</sub><sup>25</sup> = -28.7 (c 1, MeOH). <sup>1</sup>H NMR: δ 8.10 (br s, 1H), 7.78 (d, *J* = 7.6, 2H), 7.58 (m, 3H), 7.41 (t, *J* = 7.4, 2H), 7.33 (t, *J* = 7.6, 2H), 7.15 (d, *J* = 8.1, 1H), 7.08 (qt, *J* = 7.0, 2H), 6.94 (d, *J* = 2.3, 1H), 4.67 (d, *J* = 8.8, 1H), 4.46 (t, *J* = 5.7, 2H), 4.19 (t, *J* = 6.1, 1H), 3.57 (m, 2H), 3.47 (m, 1H), 3.18 (m, 2H), 3.05 (m, 1H), 2.90 (m, 2H), 2.86 (m, 1H), 2.25 (m, 1H), 2.17 (m, 2H), 2.10 (m, 1H), 1.71 (m, 4H), 1.63 (m, 1H). <sup>13</sup>C NMR: δ 174.5, 156.3, 144.0, 141.5, 136.3, 127.9, 127.7, 127.3, 125.0, 122.4, 122.3, 120.2, 119.6, 119.0, 113.4, 111.5, 68.4, 66.3, 62.2, 55.3, 53.7, 51.2, 47.4, 39.4, 30.2, 24.9, 24.1. MS (ESI<sup>+</sup>): calcd for C<sub>33</sub>H<sub>37</sub>N<sub>4</sub>O<sub>4</sub> [M + H]<sup>+</sup> m/z = 553.28, found m/z = 553.32.

**Fmoc-Ser(PO(O $t$ Bu)<sub>2</sub>)-Ψ[CH<sub>2</sub>N]-Pro-2-(indol-3-yl)-ethylamine, 9.** To a solution of **8** (85 mg, 0.15 mmol) in THF (4 mL) was added 5-ethylthio-H-tetrazole (60 mg, 0.46 mmol) and di-*tert*-butyl diisopropylphosphoramidite (85 mg, 0.31 mmol) at rt. The mixture was stirred at rt for 17 h, and cooled to -40 °C. A solution of 5–6 M *tert*-butyl hydroperoxide in decane (0.11 mL, 0.61 mmol) was added slowly, and the mixture was stirred at -40 °C for 1 h, then at rt for 30 min. The reaction was cooled to -40 °C, and quenched by addition of saturated aq Na<sub>2</sub>S<sub>2</sub>O<sub>3</sub>. The mixture was extracted with EtOAc (20 mL × 2), and the combined organic extracts were washed with water (20 mL), brine (20 mL), and dried over Na<sub>2</sub>SO<sub>4</sub>. Concentration under vacuum provided a residue, which was purified by chromatography to give **9** as a colorless oil (51 mg, 45%). Anal. HPLC: 210 nm, 4.0 min, 81%. <sup>1</sup>H NMR (400 MHz): δ 9.03 (br, 1H), 7.77 (d, *J* = 7.6, 2H), 7.59 (m, 3H), 7.41 (t, *J* = 7.4, 2H), 7.31 (m, 3H), 7.12 (t, *J* = 7.1, 1H), 7.06 (t, *J* = 7.2, 1H & s, 1H), 5.07 (d, *J* = 8.3, 1H), 4.38 (ddd, *J* = 6.6, 10.8, 15.0, 2H), 4.19 (t, *J* = 6.7, 1H), 3.81 (tt, *J* = 3.6, 7.2, 1H), 3.67 (dt, 2H), 3.56 (m, 1H), 3.38 (ddd, *J* = 5.2, 8.5, 10.6, 1H), 3.02 (m, 2H), 2.95 (m, 2H), 2.43 (dd, *J* = 5.6, 12.4, 1H), 2.33 (m, 2H), 2.09 (m, 1H), 1.80 (m, 1H), 1.71 (m, 1H), 1.56 (m, 1H), 1.48 (d, *J* = 2.0, 18H). <sup>13</sup>C NMR (100 MHz): δ 174.3, 156.1, 143.9, 141.4, 136.5, 127.8, 127.2, 125.15, 125.11, 122.3, 122.0, 120.1, 119.3, 119.0, 113.0, 111.6, 83.4, 69.2, 66.7, 66.2, 56.8, 54.2, 50.7, 47.3, 39.2, 30.3, 29.9, 24.8, 24.3. <sup>31</sup>P NMR: δ -8.43. HRMS (FAB<sup>+</sup>): calcd for C<sub>41</sub>H<sub>54</sub>N<sub>4</sub>O<sub>7</sub>P [M + H]<sup>+</sup> *m/z* = 745.3730, found *m/z* = 745.3751.

**Fmoc-Ser(PO(OH)<sub>2</sub>)-Ψ[CH<sub>2</sub>N]-Pro-2-(indol-3-yl)-ethylamine, 1.** To a solution of **9** (43 mg, 0.058 mmol) in anhydrous CH<sub>2</sub>Cl<sub>2</sub> (2 mL) was added a mixture of TFA (0.5 mL), H<sub>2</sub>O (0.1 mL)

and TIPSH (0.02 mL), and the reaction was stirred at rt for 1 h. The solvent was removed under vacuum, and the residue was purified by semi-preparative HPLC on an XBridge C18 4.6 × 50 mm column with 10% B for 3 min, then 10% to 90% B gradient over 10 min, at 15 mL/min (A: 0.1% TFA/H<sub>2</sub>O (v/v), B: 0.1% TFA/CH<sub>3</sub>CN (v/v)) to provide **1** at 11.2 min as a white solid after lyophilization (35 mg, 95%). Anal. HPLC: C18 4.6 × 50 mm column, gradient: 10% B for 3 min, then 10 to 90% B over 6 min, held 90% B for 9 min, 254 nm, 8.7 min, 97%.  $[\alpha]_D^{25} = -4.4$  (*c* 1, MeOH). <sup>1</sup>H NMR (CD<sub>3</sub>OD): δ 7.74 (dd, *J* = 2.8, 7.3, 2H), 7.62 (d, *J* = 7.3, 1H), 7.52 (dd, *J* = 7.7, 13.5, 2H), 7.34 (m, 3H), 7.26 (t, *J* = 7.5, 1H), 7.22 (t, *J* = 7.6, 1H), 7.05 (m, 2H), 6.94 (t, *J* = 7.4, 1H), 4.44 (dd, *J* = 6.4, 10.6, 1H), 4.31 (dd, *J* = 7.1, 10.5, 1H), 4.15 (m, 2H), 4.08 (m, 1H), 3.94 (m, 1H), 3.89 (m, 1H), 3.68 (m, 1H), 3.52 (m, 2H), 3.39 (d, *J* = 11.5, 1H), 3.28 (d, *J* = 13.0, 1H), 3.16 (m, 1H), 2.95 (m, 2H), 2.36 (m, 1H), 2.04 (m, 1H), 1.86 (m, 2H). <sup>13</sup>C NMR (CD<sub>3</sub>OD): δ 168.6, 158.0, 145.3, 145.0, 142.6, 138.1, 128.8, 128.2, 126.2, 126.1, 123.7, 122.4, 120.9, 119.7, 119.3, 112.8, 112.4, 68.7, 68.0, 66.6, 57.6, 56.7, 41.8, 30.8, 26.0, 24.2. <sup>31</sup>P NMR (CD<sub>3</sub>OD): δ 0.29. MS (ESI<sup>+</sup>) calcd for C<sub>33</sub>H<sub>37</sub>N<sub>4</sub>O<sub>7</sub>P [M]<sup>+</sup> *m/z* = 632.24 found *m/z* = 632.27.

**Scheme S2.** Synthesis of Ac-pSer-Ψ[CH<sub>2</sub>N]-Pro-2-(indol-3-yl)-ethylamine inhibitor **2**.

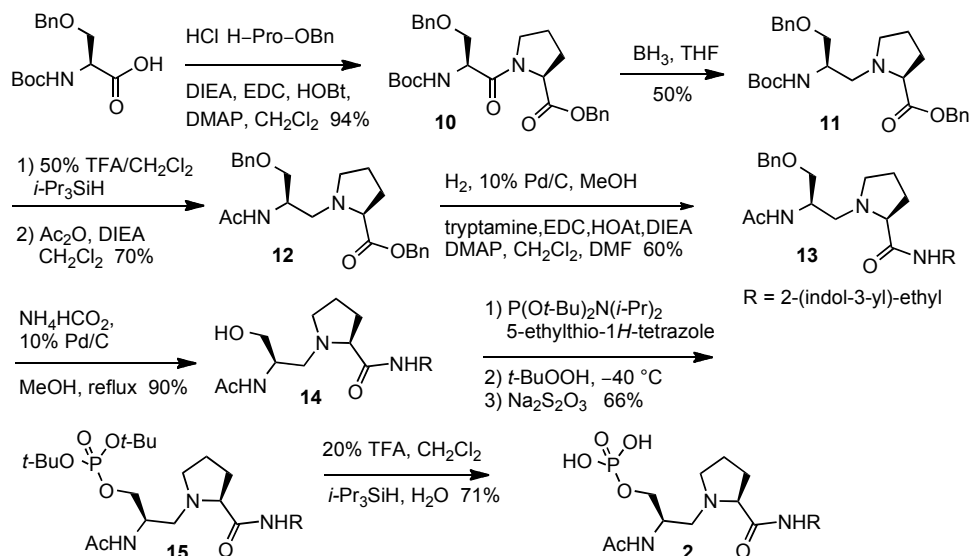

**Boc-Ser(OBn)-Pro-OBn, 10.** Boc-L-Ser(OBn)-OH (2.00 g, 6.77 mmol), HCl·H-Pro-OBn (1.80 g, 7.45 mmol), and DIEA (2.63 g, 20.3 mmol) were dissolved in  $\text{CH}_2\text{Cl}_2$  (100 mL) and cooled to  $0^\circ\text{C}$ . EDC (1.55 g, 8.12 mmol), HOBT (1.24 g, 8.12 mmol) and DMAP (227 mg, 2.03 mmol) were added, and the mixture was stirred at rt for 48 h. The mixture was diluted with 20 mL  $\text{CH}_2\text{Cl}_2$ , washed with 1N HCl (50 mL  $\times$  2),  $\text{NaHCO}_3$  (50 mL  $\times$  2), and brine (50 mL). The organic layer was dried over  $\text{Na}_2\text{SO}_4$ , filtered and evaporated. The crude product was purified by chromatography (step gradient: 25 then 50% EtOAc/hexanes) to yield **10** (3.0 g, 94%) as a colorless oil. Anal. HPLC: 210 nM, 10.4 min, 99%.  $[\alpha]_D^{25} = -56.9$  ( $c$  1, MeOH).  $^1\text{H NMR}$   $\delta$  7.32 (m, 10H), 5.41 (d,  $J = 8.6, 0.82\text{H}$ ), 5.37 (d,  $J = 8.5, 0.18\text{H}$ ), 5.21 (d,  $J = 12.1, 1\text{H}$ ), 5.10 (d,  $J = 12.5, 1\text{H}$ ), 4.84 (dd,  $J = 2.1, 8.2, 0.18\text{H}$ ), 4.70 (m, 0.82H), 4.58 (dd,  $J = 3.8, 8.4, 1\text{H}$ ), 4.51 (d,  $J = 11.7, 1\text{H}$ ), 4.44 (d,  $J = 11.9, 1\text{H}$ ), 3.69 (m, 2H), 3.61 (m, 2H), 2.19 (m, 1H), 1.97 (m, 3H), 1.42 (s, 7.4H), 1.40 (s, 1.6H).  $^{13}\text{C NMR}$   $\delta$  171.8 (m), 171.7, 170.2 (m), 169.5, 155.4, 154.8 (m), 138.0, 137.9 (m), 135.7, 135.5(m), 128.7 (m), 128.6, 128.43(m), 128.39, 128.32, 128.26 (m), 128.2,



127.8(m), 127.71, 127.66, 127.5(m), 79.8, 79.7 (m), 73.4 (m), 73.2, 71.7 (m), 70.5, 67.5 (m), 66.9, 59.3 (m), 59.2, 52.1, 51.5 (m), 47.1, 46.5 (m), 30.8 (m), 29.1, 28.40, 28.37 (m), 24.9, 22.3 (m). HRMS (FAB<sup>+</sup>) calcd for C<sub>27</sub>H<sub>35</sub>N<sub>2</sub>O<sub>6</sub> [M + H]<sup>+</sup>  $m/z$  = 483.24951, found  $m/z$  = 483.24969.

**Boc-Ser(OBn)-Ψ[CH<sub>2</sub>N]-Pro-OBn, 11.** Boc-Ser(OBn)-Pro-OBn **10** (3.00 g, 6.22 mmol) was dissolved in dry THF (14 mL), and BH<sub>3</sub> (1 M in THF, 12.4 mL, 12.4 mmol) was added dropwise at 0 °C. After the addition was complete, the resulting mixture was stirred at 0 °C for 2 h, then at rt for 24 h. The reaction was cooled to 0 °C, and MeOH (10 mL) was added slowly. The solvent was evaporated, and the residue was purified by chromatography with 25% EtOAc/hexanes to yield **11** (1.4 g, 50%) as a colorless oil. Anal. HPLC: 254 nm, 11.2 min, 97%.  $[\alpha]_D^{25} = -34.4$  (c 1, MeOH). <sup>1</sup>H NMR δ 7.31 (m, 10H), 5.15 (m, 1H), 5.13 (d,  $J = 12.3$ , 1H), 5.09 (d,  $J = 12.3$ , 1H), 4.51 (d,  $J = 11.8$ , 1H), 4.46 (d,  $J = 11.7$ , 1H), 3.79 (m, 1H), 3.67 (m, 1H), 3.55 (dd,  $J = 5.0, 9.2$ , 1H), 3.32 (dd,  $J = 5.6, 8.6$ , 1H), 3.17 (dt,  $J = 4.1, 8.0$ , 1H), 2.86 (dd,  $J = 8.0, 12.4$ , 1H), 2.65 (m, 1H), 2.52 (m, 1H), 2.08 (m, 1H), 1.90 (m, 2H), 1.80 (m, 1H), 1.43 (s, 9H). <sup>13</sup>C NMR δ 174.3, 155.7, 138.5, 136.1, 128.6, 128.4, 128.2, 127.7, 127.6, 79.1, 73.2, 70.0, 66.6, 66.3, 55.7, 54.1, 49.7, 29.5, 28.5, 23.9. HRMS (FAB<sup>+</sup>) calcd for C<sub>27</sub>H<sub>37</sub>N<sub>2</sub>O<sub>5</sub> [M + H]<sup>+</sup>  $m/z$  = 469.2702, found  $m/z$  = 469.2709.

**Ac-Ser(OBn)-Ψ[CH<sub>2</sub>N]-Pro-OBn, 12.** Boc-Ser(OBn)-Ψ[CH<sub>2</sub>N]-Pro-OBn **11** (500 mg, 1.07 mmol) was dissolved in CH<sub>2</sub>Cl<sub>2</sub> (10 mL) and a solution of TFA (10 mL) and *i*-Pr<sub>3</sub>SiH (0.1 mL) was added. The mixture was stirred at rt for 2 h, and concentrated under reduced pressure. The ammonium salt obtained was dissolved in CH<sub>2</sub>Cl<sub>2</sub> (5 mL) with DIEA (0.6 mL), and Ac<sub>2</sub>O (0.6

mL) was added. The mixture was stirred at rt for 14 h. After concentration, the residue was purified by chromatography with EtOAc to yield **12** (0.30 g, 70%) as a colorless oil. Anal. HPLC: 210 nM, 9.4 min, 99%.  $[\alpha]_D^{25} = -27.4$  (*c* 1, MeOH).  $^1\text{H NMR}$   $\delta$  7.34 (m, 10H), 6.67 (d, *J* = 7.3, 1H), 5.15 (d, *J* = 12.1, 1H), 5.10 (d, *J* = 12.2, 1H), 4.54 (d, *J* = 11.9, 1H), 4.46 (d, *J* = 11.9, 1H), 4.07 (m, 1H), 3.68 (dd, *J* = 4.4, 9.2, 1H), 3.48 (dd, *J* = 7.0, 9.2, 1H), 3.37 (m, 1H), 3.17 (m, 1H), 2.86 (dd, *J* = 4.0, 13.0, 1H), 2.74 (dd, *J* = 6.0, 12.8, 1H), 2.54 (m, 1H), 2.17 (m, 1H), 1.94 (s, 3H), 1.86 (m, 3H).  $^{13}\text{C NMR}$   $\delta$  175.1, 170.1, 138.4, 135.9, 128.7, 128.5, 128.4, 128.3, 127.9, 127.8, 73.3, 69.4, 67.2, 66.6, 55.6, 55.5, 48.7, 30.0, 24.3, 23.4. HRMS (FAB<sup>+</sup>) calcd for C<sub>24</sub>H<sub>31</sub>N<sub>2</sub>O<sub>4</sub> [M + H]<sup>+</sup> *m/z* = 411.2284, found *m/z* = 411.2273.

**Ac-Ser(OBn)-Ψ[CH<sub>2</sub>N]-Pro-2-(indol-3-yl)-ethylamine, 13.** Ac-Ser(OBn)-Ψ[CH<sub>2</sub>N]-Pro-OBn **12** (0.15 g, 0.36 mmol) was dissolved in MeOH (5 mL), and 10% Pd/C (30 mg) was added. The reaction was stirred at rt under H<sub>2</sub> at 1 atm for 2 h. The solution was filtered through Celite, washed with MeOH, and the solvent was evaporated. The crude oil and tryptamine (60 mg, 0.38 mmol) were dissolved in a mixture of CH<sub>2</sub>Cl<sub>2</sub> (10 mL), and DMF (5 mL), and HOAt (58 mg, 0.38 mmol), DMAP (10 mg, 0.09 mmol), and EDC (72 mg, 0.38 mmol) were added. The mixture was stirred at rt for 24 h, diluted with CH<sub>2</sub>Cl<sub>2</sub> (30 mL), washed with water (20 mL), and brine (25 mL). The organic layer was dried over Na<sub>2</sub>SO<sub>4</sub>. After filtration and evaporation, the residue was purified by chromatography (step gradient: 6% to 17% MeOH/EtOAc) to yield **13** as a light yellow oil (85 mg; 60%). Anal. HPLC: 210 nM, 8.5 min, 96%.  $^1\text{H NMR}$   $\delta$  8.43 (br s, 1H), 7.56 (m, 2H), 7.32 (m, 4H), 7.16 (m, 3H), 7.08 (dt, *J* = 0.9, 7.4, 1H), 6.97 (d, *J* = 2.4, 1H), 5.60

(d,  $J = 8.1$ , 1H), 4.18 (d,  $J = 11.8$ , 1H), 4.13 (d,  $J = 11.9$ , 1H), 3.96 (dt,  $J = 3.0, 6.0, 9.0$ , 1H), 3.65 (dq,  $J = 6.6, 13.2$ , 1H), 3.40 (m, 1H), 3.15 (dd,  $J = 3.0, 9.6$ , 1H), 3.13 (dd,  $J = 3.4, 9.6$ , 1H), 3.05 (m, 2H), 3.01 (dt,  $J = 6.2, 14.4$ , 1H), 2.88 (dt,  $J = 7.2, 14.4$ , 1H), 2.56 (dd,  $J = 8.7, 12.1$ , 1H), 2.37 (dd,  $J = 6.2, 12.1$ , 1H), 2.34 (dt,  $J = 6.8, 9.5$ , 1H), 2.12 (m, 1H), 1.87 (s, 3H), 1.82 (m, 1H), 1.75 (m, 1H), 1.64 (m, 1H).  $^{13}\text{C}$  NMR  $\delta$  174.6, 169.8, 137.9, 136.5, 128.6, 128.0, 127.6, 122.2, 122.1, 119.4, 113.3, 111.4, 73.1, 69.2, 68.9, 56.7, 54.4, 48.5, 39.4, 30.4, 25.4, 24.5, 23.5. HRMS (FAB<sup>+</sup>) calcd for C<sub>27</sub>H<sub>35</sub>N<sub>4</sub>O<sub>3</sub> [M + H]<sup>+</sup>  $m/z = 463.27092$ , found  $m/z = 463.27051$ .

**Ac-Ser-Ψ[CH<sub>2</sub>N]-Pro-2-(indol-3-yl)-ethylamine, 14.** Ac-Ser(OBn)-Ψ[CH<sub>2</sub>N]-Pro-2-(indol-3-yl)-ethylamine **13** (125 mg, 0.270 mmol) was dissolved in MeOH (8 mL), and 10% Pd/C (50 mg) and ammonium formate (120 mg) were added. The reaction mixture was heated at reflux for 8 h. After cooling to rt, the mixture was filtered through Celite, washed with MeOH, and purified by chromatography with 17% MeOH/EtOAc to give **14** as a lightly yellow oil (100 mg, 100%).

Anal. HPLC: 210 nM, 7.0 min, 94%.  $^1\text{H}$  NMR  $\delta$  8.58 (br, 1H), 7.60 (d,  $J = 8.1$ , 1H), 7.37 (d,  $J = 8.1$ , 1H), 7.35 (m, 1H), 7.20 (t,  $J = 7.6$ , 1H), 7.10 (t,  $J = 7.4$ , 1H), 7.00 (s, 1H), 5.97 (br, 1H), 3.84 (m, 1H), 3.65 (m, 1H), 3.53 (m, 1H), 3.28 (m, 2H), 3.03 (m, 2H), 2.93 (m, 2H), 2.45 (m, 1H), 2.24 (m, 2H), 2.09 (m, 1H), 1.91 (s, 3H), 1.74 (m, 3H).  $^{13}\text{C}$  NMR (CD<sub>3</sub>OD, 100MHz)  $\delta$  177.2, 173.1, 138.1, 128.8, 123.5, 122.4, 119.6, 119.4, 113.1, 112.2, 69.6, 62.9, 57.1, 55.4, 51.9, 41.0, 31.3, 26.1, 25.0, 22.7. HRMS (FAB<sup>+</sup>) calcd for C<sub>20</sub>H<sub>29</sub>N<sub>4</sub>O<sub>3</sub> [M + H]<sup>+</sup>  $m/z = 373.22397$ , found  $m/z = 373.22684$ .

**Ac-Ser(PO(O*t*Bu)<sub>2</sub>)-Ψ[CH<sub>2</sub>N]-Pro-2-(indol-3-yl)-ethylamine, 15.** To a solution of **14** (70 mg, 0.19 mmol) in THF (8 mL) was added 5-ethylthio-H-tetrazole (98 mg, 0.75 mmol) and di-*tert*-butyl diisopropylphosphoramidite (0.12 mL, 0.38 mmol), and the mixture was stirred at rt for 15 h. The mixture was cooled to -40 °C, *t*-BuOOH (5–6 M in decane, 0.15 mL, 0.75 mmol) was added slowly, and the mixture was stirred at rt for 30 min. The mixture was cooled to -40 °C, and quenched with saturated aq Na<sub>2</sub>S<sub>2</sub>O<sub>3</sub>. The mixture was extracted with CH<sub>2</sub>Cl<sub>2</sub> (20 mL × 2), and the combined organic extracts were dried over Na<sub>2</sub>SO<sub>4</sub>. Concentration under vacuum provided a residue, that was purified by chromatography (step gradient: 9 then 17% EtOAc/MeOH) to give **15** as a colorless oil (70 mg, 66%). Anal. HPLC: gradient 10% B for 3 min, then 10 to 90% B over 6 min, 254 nm, 8.5 min, 98%.  $[\alpha]_D^{25} = +21.6$  (*c* 1, MeOH). <sup>1</sup>H NMR δ 9.01 (s, 1H), 7.64 (d, *J* = 8.0, 1H), 7.38 (m, 2H), 7.19 (m, 1H), 7.10 (m, 2H), 6.07 (d, *J* = 7.9, 1H), 3.90 (m, 1H), 3.79 (m, 1H), 3.63 (m, 2H), 3.47 (dt, *J* = 5.2, 10.4, 1H), 3.10 (m, 1H), 3.01 (m, 3H), 2.47 (dd, *J* = 5.8, 12.2, 1H), 2.37 (m, 2H), 2.09 (m, 1H), 1.84 (s, 3H), 1.80 (m, 1H), 1.73 (m, 1H), 1.57 (m, 1H), 1.50 (d, *J* = 6.4, 18H). <sup>13</sup>C NMR δ 174.5, 170.1, 136.6, 127.8, 122.4, 122.1, 119.4, 119.0, 113.1, 111.5, 83.53 (d, <sup>2</sup>*J*<sub>P,C</sub> = 4.2), 83.47 (d, <sup>2</sup>*J*<sub>P,C</sub> = 4.2), 69.2, 66.4 (d, <sup>2</sup>*J*<sub>P,C</sub> = 5.7), 56.4, 54.4, 49.1 (d, <sup>3</sup>*J*<sub>P,C</sub> = 4.8), 39.2, 30.4, 30.03 (d, <sup>3</sup>*J*<sub>P,C</sub> = 4.3), 29.99 (d, <sup>3</sup>*J*<sub>P,C</sub> = 4.3), 25.0, 24.5, 23.4. <sup>31</sup>P NMR δ -7.86. MS (ESI<sup>+</sup>) calcd for C<sub>28</sub>H<sub>45</sub>N<sub>4</sub>O<sub>6</sub>P [M + H]<sup>+</sup> *m/z* = 565.3, found *m/z* = 565.3.

**Ac-Ser(PO(OH)<sub>2</sub>)-Ψ[CH<sub>2</sub>N]-Pro-2-(indol-3-yl)-ethylamine, 2.** To a solution of **15** (30 mg, 0.053 mmol) in CH<sub>2</sub>Cl<sub>2</sub> (2 mL) was added a mixture of TFA (0.5 mL), H<sub>2</sub>O (0.01 mL) and *i*-

Pr<sub>3</sub>SiH (0.01 mL), and the reaction was stirred at rt for 1 h. The solvent was removed under vacuum, and the residue was purified by semi-preparative HPLC with 10% B for 2 min, then 10% to 90% CH<sub>3</sub>CN/H<sub>2</sub>O gradient over 9 min, at 15 mL/min (A: 0.1% TFA/H<sub>2</sub>O, B, 0.1% TFA in CH<sub>3</sub>CN) to provide **2**, ret. time 5.4 min, as a white solid after lyophilization (17 mg, 71%).

Anal. HPLC: gradient 10% B for 3 min, then 10 to 90% B over 6 min (A: 0.1% TFA/H<sub>2</sub>O, B: 0.1% TFA/CH<sub>3</sub>CN), 254 nm, 6.4 min, 97%.  $[\alpha]_D^{25} = -12.3$  (*c* 1, MeOH). <sup>1</sup>H NMR (DMSO-d<sub>6</sub>, 400 MHz) δ 10.9 (s, 1H), 8.38 (br, 1H), 8.04 (d, *J* = 6.0, 1H), 7.56 (d, *J* = 7.6, 1H), 7.33 (d, *J* = 8.0, 1H), 7.15 (s, 1H), 7.05 (t, *J* = 7.4, 1H), 6.97 (t, *J* = 7.4, 1H), 4.11 (m, 1H), 3.80 (m, 2H), 3.62 (m, 1H), 3.39 (m, 3H), 3.07 (m, 1H), 2.85 (m, 4H), 2.18 (m, 1H), 1.83 (s, 3H), 1.71 (m, 3H). <sup>13</sup>C NMR (CD<sub>3</sub>OD) δ 173.8, 168.7, 138.2, 128.8, 123.8, 122.4, 119.6, 119.3, 112.8, 112.4, 68.8, 66.2, 57.4, 56.8, 48.2, 41.7, 30.8, 26.0, 24.2, 22.8. <sup>31</sup>P NMR (DMSO-d<sub>6</sub>) δ -0.78. HRMS (FAB<sup>+</sup>) calcd for C<sub>20</sub>H<sub>30</sub>N<sub>4</sub>O<sub>6</sub>P [M + H]<sup>+</sup> *m/z* = 453.1903, found *m/z* = 453.1912.

**Scheme S3.** Synthesis of Fmoc-pThr-Ψ[CH<sub>2</sub>N]-Pro-2-(indol-3-yl)-ethylamine inhibitor **3**.

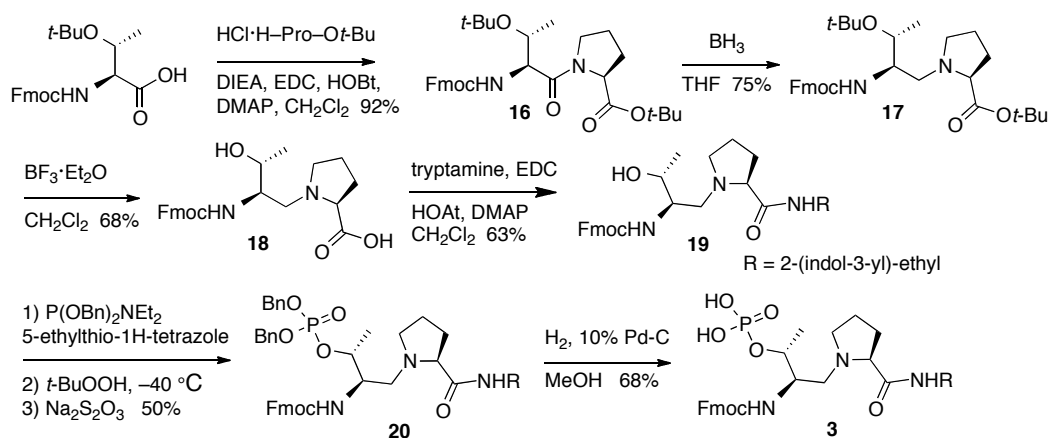

**Fmoc-Thr(OtBu)-Pro-OtBu, 16.** A solution of DIEA (0.49 g, 3.8 mmol) and HCl·H-Pro-OtBu (0.52 g, 2.5 mmol) in CH<sub>2</sub>Cl<sub>2</sub> (25 mL) was added to a solution of Fmoc-Thr(OtBu)-OH (1.0 g, 2.5 mmol), EDC (0.58g, 3.0 mmol), and HOBT (0.46 g, 3.0 mmol) in CH<sub>2</sub>Cl<sub>2</sub> (25 mL). The mixture was stirred at rt for 13 h, washed with 1 M HCl (30 mL), 5% aq NaHCO<sub>3</sub> (30 mL), and brine (30 mL). The organic layer was dried over Na<sub>2</sub>SO<sub>4</sub>, filtered, and evaporated. The crude product was purified by chromatography with 20% EtOAc/hexanes to give **16** (1.3 g, 92%) as a colorless oil. <sup>1</sup>H NMR δ 7.75 (d, *J* = 7.7, 2H), 7.59 (m, 2H), 7.38 (m, 2H), 7.29 (m, 2H), 5.95 (d, *J* = 6.9, 0.4H), 5.75 (d, *J* = 7.8, 0.6H), 5.21 (dd, *J* = 3.4, 7.0, 0.4H), 4.45 (dd, *J* = 5.2, 7.8, 0.6H), 4.35 (m, 3H), 4.20 (t, *J* = 7.2, 1H), 3.92 (m, 1.6H), 3.72 (m, 1H), 3.54 (dt, *J* = 8.2, 16.6, 0.4H), 2.19 (m, 1H), 2.05-1.84 (m, 3H), 1.47 (s, 5.4H), 1.42 (s, 3.6H), 1.27 (s, 3.6H), 1.23 (s, 5.4H), 1.21 (d, *J* = 6.2, 1.8H), 1.07 (d, *J* = 6.6, 1.2H). <sup>13</sup>C NMR δ 171.5 (m), 171.2, 169.0, 168.3 (m), 155.9, 155.3 (m), 144.1, 143.9 (m), 127.7, 127.1, 125.31, 125.26 (m), 120.0, 82.5 (m), 81.3, 75.1 (m), 74.6, 70.9 (m), 69.2, 67.0, 66.9 (m), 60.14 (m), 60.06, 57.6, 57.3 (m), 48.0, 47.2, 46.6 (m), 30.7, 30.5 (m), 29.2 (m), 28.4, 28.0, 27.9 (m), 25.0, 22.3(m), 19.2, 17.6 (m). HRMS (ESI<sup>+</sup>) calcd for C<sub>32</sub>H<sub>43</sub>N<sub>2</sub>O<sub>6</sub> [M + H]<sup>+</sup> *m/z* = 551.3121, found *m/z* = 551.3134.

**Fmoc-Thr(OtBu)-Ψ[CH<sub>2</sub>N]-Pro-OtBu, 17.** Fmoc-Thr(OtBu)-Pro-OtBu **16** (1.14 g, 2.08 mmol) in dry THF (15 mL) was added to a solution of BH<sub>3</sub> (1.00 M in THF, 4.15 mL, 4.15 mmol) at 0 °C over a period of 15 min. The resulting mixture was stirred at rt for 13 h, cooled to 0 °C, and MeOH (5 mL) was added slowly. After evaporation, the residue was purified by chromatography with 12% EtOAc/hexanes to yield **17** (0.44 g, 40%) as a colorless oil, and 0.54

g (47%) of the starting material was recovered.  $^1\text{H}$  NMR  $\delta$  7.76 (m, 2H), 7.61 (m, 2H), 7.39 (m, 2H), 7.31 (m, 2H), 5.28 (d,  $J = 8.3$ , 1H), 4.36 (d,  $J = 7.3$ , 2H), 4.25 (t,  $J = 7.2$ , 1H), 3.99 (m, 1H), 3.62 (m, 1H), 3.25 (dd,  $J = 4.1, 8.7$ , 1H), 3.06 (m, 1H), 2.85 (dd,  $J = 6.0, 12.4$ , 1H), 2.67 (q,  $J = 7.5$ , 1H), 2.55 (dd,  $J = 7.3, 12.3$ , 1H), 2.04 (m, 1H), 1.83 (m, 3H), 1.44 (s, 9H), 1.20 (s, 9H), 1.13 (d,  $J = 6.4$ , 3H).  $^{13}\text{C}$  NMR  $\delta$  174.0, 156.9, 144.5, 141.5, 127.8, 127.2, 125.4, 124.8, 120.2, 66.7, 66.6, 66.3, 65.3, 55.5, 55.4, 53.2, 50.5, 47.5, 29.7, 29.0, 28.3, 23.5, 20.1. HRMS (ESI $^+$ ) calcd for  $\text{C}_{32}\text{H}_{45}\text{N}_2\text{O}_5$   $[\text{M} + \text{H}]^+$   $m/z = 537.3328$ , found  $m/z = 537.3325$ .

**Fmoc-Thr- $\Psi$ [CH $_2$ N]-Pro-2-(indol-3-yl)-ethylamine, **19**.**

Fmoc-Thr(O*t*Bu)- $\Psi$ [CH $_2$ N]-Pro-O*t*Bu **17** (240 mg, 4.47 mmol) was dissolved in  $\text{CH}_2\text{Cl}_2$  (8 mL), and  $\text{BF}_3 \cdot \text{Et}_2\text{O}$  (0.8 mL, 6.3 mmol), *i*Pr $_3$ SiH (10  $\mu\text{L}$ ), and  $\text{H}_2\text{O}$  (10  $\mu\text{L}$ ) were added. The reaction mixture was stirred at rt for 1 h. After evaporation, the residue was purified by chromatography (step gradient: 10% then 25% MeOH/ $\text{CH}_2\text{Cl}_2$ ) to yield **18** (130 mg, 68%) as a colorless oil. Fmoc-Thr- $\Psi$ [CH $_2$ N]-Pro-OH **18** (130 mg, 0.31 mmol) was dissolved in DMF (10 mL). EDC (72 mg, 0.37 mmol), HOAt (58 mg, 0.37 mmol), DMAP (10.0 mg, 0.092 mmol) and tryptamine (60 mg, 0.37 mmol) were added in order. The reaction mixture was stirred at rt for 12 h, diluted with EtOAc (60 mL), and washed with water (40 mL). The aqueous solution was extracted with EtOAc (30 mL), and the combined organic extracts were washed with  $\text{NaHCO}_3$  (30 mL), water (30 mL), and brine (30 mL). The organic layer was dried over  $\text{Na}_2\text{SO}_4$ . After filtration and evaporation, the residue was purified by chromatography with EtOAc to give **19** as a colorless oil (110 mg, 63%).  $^1\text{H}$  NMR  $\delta$  7.92 (s, 1H), 7.78 (d,  $J = 7.5$ , 2H), 7.59 (app. t,  $J = 6.4$ ,

3H), 7.41 (t,  $J = 7.1$ , 2H), 7.33 (app. t,  $J = 7.4$ , 3H), 7.13 (m, 3H), 6.94 (s, 1H), 4.55 (d,  $J = 8.2$ , 1H), 4.49 (d,  $J = 6.0$ , 2H), 4.20 (t,  $J = 6.0$ , 1H), 3.64 (app. sextet,  $J = 6.5$ , 1H), 3.55 (m, 2H), 3.36 (m, 1H), 3.07 (dt,  $J = 6.2$ , 14.8, 1H), 2.93 (m, 2H), 2.88 (dt,  $J = 6.3$ , 15.1, 1H), 2.34 (t,  $J = 10.8$ , 1H), 2.18 (m, 2H), 2.12 (m, 1H), 1.81-1.65 (m, 6H), 0.83 (d,  $J = 6.4$ , 3H).  $^{13}\text{C}$  NMR  $\delta$  156.6, 144.1, 144.0, 141.5, 136.3, 127.9, 127.6, 127.3, 125.0, 122.6, 122.4, 120.2, 119.7, 119.0, 113.7, 111.6, 68.4, 66.2, 65.2, 56.2, 54.3, 53.6, 47.5, 39.0, 30.1, 25.2, 24.0, 19.9. HRMS (ESI<sup>+</sup>) calcd for  $\text{C}_{34}\text{H}_{39}\text{N}_4\text{O}_4$  [ $\text{M} + \text{H}$ ]<sup>+</sup>  $m/z = 567.2971$ , found  $m/z = 567.2981$ .

**Fmoc-Thr(PO(OBn)<sub>2</sub>)-Ψ[CH<sub>2</sub>N]-Pro-2-(indol-3-yl)-ethylamine, 20.** To a solution of **19** (60 mg, 0.11 mmol) in THF (3 mL) was added 5-ethylthio-1H-tetrazole (41 mg, 0.32 mmol) and dibenzyl diethylphosphoramidite (67 mg, 0.21 mmol), and the mixture was stirred at rt for 16 h. The mixture was cooled to -40 °C, *t*-BuOOH (5-6 M in decane, 0.077 mL, 0.42 mmol) was added slowly, and the mixture was stirred at -40 °C for 10 min, then at rt for 30 min. The mixture was cooled to -40 °C, and quenched by addition of saturated aq Na<sub>2</sub>S<sub>2</sub>O<sub>3</sub>. The mixture was diluted with EtOAc (60 mL), washed with water (20 mL × 2), brine (20 mL), and dried over Na<sub>2</sub>SO<sub>4</sub>. Concentration under vacuum provided a residue, which was purified by chromatography with EtOAc to give **20** as a colorless oil (44 mg, 50%).  $^1\text{H}$  NMR  $\delta$  8.37 (s, 1H), 7.77 (d,  $J = 7.4$ , 1H), 7.65 (d,  $J = 7.7$ , 1H), 7.58 (d,  $J = 7.4$ , 1H), 7.56 (d,  $J = 7.4$ , 1H), 7.40 (t,  $J = 7.6$ , 2H), 7.36-7.24 (m, 13H), 7.12 (t,  $J = 7.4$ , 1H), 7.05 (t,  $J = 7.4$ , 1H), 6.98 (d,  $J = 2.0$ , 1H), 5.06 (dd,  $J = 9.0$ , 11.6, 1H), 5.01 (dd,  $J = 8.5$ , 11.8, 1H), 4.97 (dd,  $J = 10.4$ , 11.9, 1H), 4.92 (dd,  $J = 9.9$ , 11.8, 1H), 4.50 (d,  $J = 9.6$ , 1H), 4.46 (d,  $J = 6.3$ , 2H), 4.35 (m, 1H), 4.18 (t,  $J = 6.3$ , 1H), 3.67 (app. Sextet,



$J = 6.7$ , 1H), 3.58 (m, 1H), 3.48 (m, 1H), 3.06-2.94 (m, 3H), 2.81 (t,  $J = 7.0$ , 1H), 2.38 (dd,  $J = 6.8$ , 12.6, 1H), 2.18 (m, 2H), 2.03 (m, 1H), 1.78 (m, 2H), 1.64 (m, 1H), 1.50 (m, 1H), 1.08 (d,  $J = 6.3$ , 3H).  $^{13}\text{C}$  NMR  $\delta$  174.5, 156.6, 144.0, 143.9, 141.5, 136.4, 135.8 (d,  $^3J_{\text{P,C}} = 5.1$ ), 135.7 (d,  $^3J_{\text{P,C}} = 6.4$ ), 129.0, 128.9, 128.2, 128.0, 127.9, 127.7, 127.2, 125.01, 124.95, 122.2, 122.0, 120.2, 119.3, 119.0, 113.4, 111.3, 75.5 (d,  $^2J_{\text{P,C}} = 5.8$ ), 69.68 (d,  $^2J_{\text{P,C}} = 5.3$ ), 69.64 (d,  $^2J_{\text{P,C}} = 5.0$ ), 69.4, 66.5, 58.0, 55.2, 54.6, 47.5, 39.2, 30.5, 25.2, 24.6, 18.6.  $^{31}\text{P}$  NMR (202 MHz)  $\delta$  0.22. HRMS (ESI<sup>+</sup>) calcd for  $\text{C}_{48}\text{H}_{52}\text{N}_4\text{O}_7\text{P}$  [M + H]<sup>+</sup>  $m/z = 827.3574$ , found  $m/z = 827.3579$ .

**Fmoc-Thr(PO(OH)<sub>2</sub>)-Ψ[CH<sub>2</sub>N]-Pro-2-(indol-3-yl)-ethylamine, 3.** Dibenzyl phosphate **20**

(15 mg, 0.018 mmol), and 10% Pd/C (13 mg) were dissolved in MeOH (2 mL). The reaction was stirred under H<sub>2</sub> (1 atm) at rt for 2 h. The mixture was filtered through Celite, and washed with MeOH. After evaporation, the residue was purified by semi-preparative HPLC (10% CH<sub>3</sub>CN/H<sub>2</sub>O for 3 min, then 10% to 90% CH<sub>3</sub>CN/H<sub>2</sub>O gradient over 7 min, 12 mL/min) to give **3**, ret. time 9.5 min, as a white solid after lyophilization (8.0 mg, 68%). Anal. HPLC: gradient 10% B for 3 min, then 10–90% B over 6 min (A: 0.1% HCO<sub>2</sub>H/H<sub>2</sub>O, B: 0.1% HCO<sub>2</sub>H/CH<sub>3</sub>CN), 254 nm, 8.3 min, 99%.  $^1\text{H}$  NMR (CD<sub>3</sub>OD)  $\delta$  7.77 (dd,  $J = 4.2, 7.6$ , 2H), 7.65 (d,  $J = 7.7$ , 1H), 7.56 (t,  $J = 6.8$ , 2H), 7.35 (m, 3H), 7.27 (t,  $J = 7.6$ , 1H), 7.24 (t,  $J = 7.5$ , 1H), 7.07 (t,  $J = 7.6$ , 1H), 7.06 (s, 1H), 6.96 (t,  $J = 7.4$ , 1H), 4.46 (d,  $J = 6.3$ , 2H), 4.28 (m, 1H), 4.20 (t,  $J = 6.2$ , 1H), 4.05 (m, 1H), 3.92 (m, 1H), 3.54 (m, 3H), 3.23 (m, 1H), 3.10 (m, 1H), 2.98 (m, 2H), 2.32 (m, 1H), 1.98 (m, 1H), 1.83 (m, 2H), 1.17 (d,  $J = 4.8$ , 3H).  $^{13}\text{C}$  NMR (CD<sub>3</sub>OD)  $\delta$  158.7, 145.5, 145.0, 142.6, 138.2, 128.8, 128.7, 128.1, 126.2, 126.1, 123.7, 122.4, 120.9, 119.6, 119.3, 112.9, 112.3,

72.61, 72.57, 68.2, 67.7, 57.6, 57.4, 54.0, 41.6, 31.0, 26.0, 24.4, 18.5. HRMS (ESI<sup>+</sup>) calcd for C<sub>34</sub>H<sub>40</sub>N<sub>4</sub>O<sub>7</sub>P [M + H]<sup>+</sup> *m/z* = 647.2635, found *m/z* = 647.2639.

**Scheme S4.** Synthesis of inhibitors **4a** and **4b**.

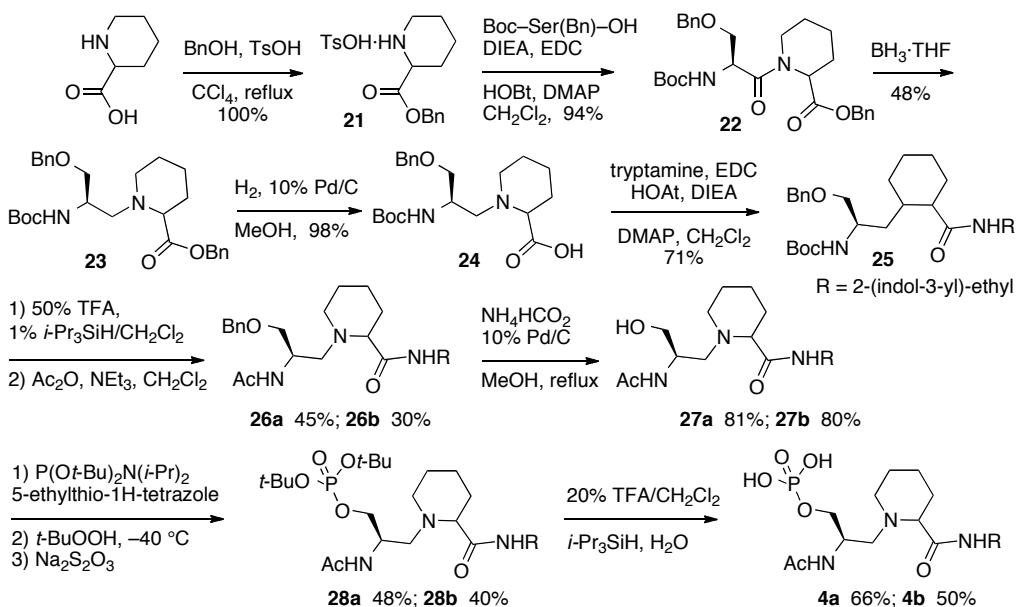

**Boc-Ser(OBn)-(\*)Pip-OBn, 22.** Racemic H-(\*)Pip-OH (6.25 g, 48.4 mmol) was suspended in CCl<sub>4</sub> (80 mL), and TsOH (11.0 g, 96.8 mmol) and BnOH (40 mL) were added. The reaction was heated at reflux for 24 h. Evaporation of solvent and precipitation with Et<sub>2</sub>O (500 mL) yielded TsOH·H-(\*)Pip-OBn **21** (17.4 g, 100%) as a white solid. TsOH·H-(\*)Pip-OBn **21** (3.50 g, 8.82 mmol) and DIEA (2.64 g, 20.3 mmol) were dissolved in CH<sub>2</sub>Cl<sub>2</sub> (80 mL). Boc-L-Ser(OBn)-OH (2.00 g, 6.78 mmol), EDC (1.55 g, 8.12 mmol), HOBt (1.25 g, 8.12 mmol) and DMAP (0.25 mg, 2.03 mmol) were added. The mixture was stirred at rt for 15 h, washed with water (30 mL), 1M HCl (30 mL × 2), NaHCO<sub>3</sub> (30 mL × 2), and brine (30 mL). The organic layer was dried over Na<sub>2</sub>SO<sub>4</sub>, filtered, and evaporated. The crude product was purified by chromatography with

25% EtOAc/hexanes to yield **22** (3.1 g, 94%) as a colorless oil.  $^1\text{H NMR}$  (50 °C)  $\delta$  7.27 (m, 10H), 5.49 (br s 1H), 5.40 (m, 1H), 5.15 (m, 2H), 4.90 (m, 1H), 4.48 (m, 2H), 3.87 (m, 1H), 3.63-3.51 (m, 2H), 3.20 (m, 1H), 2.25 (m, 1H), 1.72-1.46 (m, 4H), 1.43 (br s, 9H), 1.26 (m, 1H).  $^{13}\text{C NMR}$   $\delta$  170.8, 170.5, 170.2 (d), 138.0 (d), 137.7, 135.7, 135.6 (d), 128.6, 128.4 (d), 128.33, 128.29 (d), 128.2, 128.06 (d), 127.99, 127.97 (d), 127.89, 127.8, 127.6, 79.67, 77.36 (d), 73.3, 73.1 (d), 71.2, 70.4 (d), 67.0 (d), 66.9, 52.6, 52.4 (d), 50.5 (d), 50.2, 43.7 (d), 43.6, 28.4, 26.6, 25.2 (d), 24.8, 21.0, 20.8 (d). HRMS (ESI<sup>+</sup>) calcd for  $\text{C}_{28}\text{H}_{37}\text{N}_2\text{O}_6$  [M + H]<sup>+</sup>  $m/z$  = 497.2652, found  $m/z$  = 497.2655.

**Boc-Ser(OBn)- $\Psi$ [CH<sub>2</sub>N]-(\*)Pip-OBn, 23.** Boc-Ser(OBn)-(\*)Pip-OBn **22** (2.80 g, 5.78 mmol) was dissolved in dry THF (12 mL), and BH<sub>3</sub> (1 M in THF, 11.6 mL, 11.6 mmol) was added dropwise at 0 °C. The resulting mixture was stirred at 0 °C for 3 h and at rt for 11 h. the reaction was cooled to 0 °C, and MeOH (9 mL) was added slowly. The resulting mixture was evaporated and purified by chromatography with 9% EtOAc/hexane to yield **23** (1.3 g, 48%) as a colorless oil.  $^1\text{H NMR}$   $\delta$  7.35-7.27 (m, 10H), 5.14 (m, 2.5H), 4.92 (br, 0.5H), 4.47 (m, 2H), 3.76 (m, 1H), 3.60 (m, 1H), 3.54 (m, 0.5H), 3.42 (m, 0.5H), 3.24 (m, 1H), 3.08 (m, 0.5H), 3.02 (m, 0.5H), 2.64 (m, 1H), 2.50 (m, 1H), 2.32 (m, 1H), 1.81-1.38 (m, 6H), 1.46 (s, 4.5H), 1.44 (s, 4.5H).  $^{13}\text{C NMR}$   $\delta$  173.9, 173.7 (d), 156.0 (d), 155.7, 138.4, 136.1, 128.70, 128.67 (d), 128.48, 128.46 (d), 128.39, 128.36 (d), 128.30 (d), 128.26, 127.8, 127.74, 127.71 (d), 79.2 (d), 79.1, 73.4, 73.2 (d), 70.3, 70.0 (d), 66.2, 66.1 (d), 64.7, 64.2 (d), 57.2 (d), 57.1, 50.6 (d), 50.1, 48.7,

48.4 (d), 29.54, 29.52 (d), 28.58, 28.56 (d), 25.6, 25.5 (d), 22.2, 22.1 (d). HRMS (ESI<sup>+</sup>) calcd for C<sub>28</sub>H<sub>39</sub>N<sub>2</sub>O<sub>5</sub> [M + H]<sup>+</sup> *m/z* = 483.2859, found *m/z* = 483.2772.

**Boc-Ser(OBn)-Ψ[CH<sub>2</sub>N]-(\*)Pip-2-(indol-3-yl)-ethylamine, 25.** Boc-Ser(OBn)-Ψ[CH<sub>2</sub>N]-(\*)Pip-OBn **23** (1.0 g, 2.1 mmol) was dissolved in MeOH (50 mL), and 10% Pd/C (200 mg) was added. The reaction was stirred at rt under H<sub>2</sub> (1 atm) for 2 h. After filtration through Celite and washing with MeOH, evaporation gave Boc-Ser(OBn)-Ψ[CH<sub>2</sub>N]-(\*)Pip-OH **24** (0.8 g, 98%) as a slightly yellow oil. Without further purification, the crude Boc-Ser(OBn)-Ψ[CH<sub>2</sub>N]-(\*)Pip-OH was dissolved in CH<sub>2</sub>Cl<sub>2</sub> (400 mL); tryptamine (0.40 g, 2.5 mmol), EDC (0.48 g, 2.5 mmol), HOAt (0.39 g, 2.5 mmol), and DMAP (0.07 mg, 0.63 mmol) were added. The mixture was stirred at rt for 18 h, washed with water (150 mL), and brine (150 mL). The organic layer was dried over Na<sub>2</sub>SO<sub>4</sub>. After filtration and evaporation, the residue was purified by chromatography with 33% EtOAc/hexanes to yield **25** as a light yellow oil (0.8 g, 71%). <sup>1</sup>H NMR δ 8.25 (br, 0.6H), 8.11 (br, 0.4H), 7.59 (t, *J* = 7.5, 1H), 7.33-7.15 (m, 7.8H), 7.09 (m, 1H), 7.99 (m, 0.8H), 6.86 (br, 0.4H), 4.66 (d, *J* = 8.9, 0.4H), 4.32 (m, 2.6H), 3.80 (m, 1.6), 3.60 (m, 0.4H), 3.48 (m, 1H), 3.28-2.88 (m, 5H), 2.73 (m, 1H), 2.50 (m, 0.4H), 2.41 (m, 0.6H), 2.28 (dd, *J* = 6.6, 12.8, 0.4H), 2.17 (dd, *J* = 3.8, 13.0, 0.6H), 2.08 (m, 0.4H), 1.88 (m, 1.6H), 1.64-1.24 (m, 15H). <sup>13</sup>C NMR (100 MHz) δ 174.8 (d), 174.2, 158.82, 155.78 (d), 138.1, 137.9 (d), 136.45 (d), 136.46, 128.5, 127.91 (d), 127.88, 127.8, 127.7 (d), 127.6, 127.4 (d), 122.2, 122.1 (d), 122.0, 118.93, 119.5, 119.4 (d), 118.88 (d), 113.4 (d), 113.0, 111.4, 111.3 (d), 79.5, 77.4 (d), 73.2, 70.6 (d), 69.6 (d), 67.9, 58.9 (d), 57.1, 52.3, 51.8, 48.7, 47.8 (d), 39.3, 38.9 (d), 30.2 (d), 29.4, 28.6, 28.5 (d),

25.4, 25.2 9 (d), 24.6 (d), 24.3, 23.4 (d), 23.3. HRMS (FAB<sup>+</sup>) calcd for C<sub>31</sub>H<sub>43</sub>N<sub>4</sub>O<sub>4</sub> [M + H]<sup>+</sup> *m/z* = 535.3284, found *m/z* = 535.3285.

**Ac-Ser(OBn)-Ψ[CH<sub>2</sub>N]-(*R/S*)Pip-2-(indol-3-yl)-ethylamine, 26a and 26b.** Boc-Ser(OBn)-Ψ[CH<sub>2</sub>N]-(\*)Pip-2-(indol-3-yl)-ethylamine **25** (120 mg, 0.22 mmol) was dissolved in CH<sub>2</sub>Cl<sub>2</sub> (4 mL) and a solution of TFA (4 mL), and *i*-Pr<sub>3</sub>SiH (0.01 mL) was added at 0 °C. The mixture was stirred at 0 °C for 30 min, and at rt for 2 h. The crude mixture was concentrated under reduced pressure. The ammonium salt obtained was dissolved in CH<sub>2</sub>Cl<sub>2</sub>, and basified with NaHCO<sub>3</sub> (40 mL). After separation, the aqueous layer was extracted with CH<sub>2</sub>Cl<sub>2</sub> (20 mL × 3). The combined organic layers were washed with brine (20 mL), and dried over Na<sub>2</sub>SO<sub>4</sub>. After filtration and evaporation, the residue was dissolved in CH<sub>2</sub>Cl<sub>2</sub> (5 mL). Ac<sub>2</sub>O (46 mg, 0.45 mmol) and Et<sub>3</sub>N (46 mg, 0.45 mmol) were added. The reaction mixture was stirred at rt for 14 h. After dilution with CH<sub>2</sub>Cl<sub>2</sub> (50 mL), the mixture was washed with 0.1 M NaOH (20 mL × 2), and brine (20 mL), and dried over Na<sub>2</sub>SO<sub>4</sub>. After filtration and concentration, the residue was purified by chromatography with EtOAc to yield two diastereomers: **26a** (48 mg, 45%), and **26b** (32 mg, 30%). **26a**: <sup>1</sup>H NMR δ 8.17 (s, 1H), 7.58 (d, *J* = 7.4, 1H), 7.31 (m, 4H), 7.23 (m, 2H), 7.18 (app. dt, *J* = 1.0, 7.9, 1H), 7.10 (t, *J* = 7.4, 2H), 7.02 (d, *J* = 2.3, 1H), 5.59 (d, *J* = 8.9, 1H), 4.34 (d, *J* = 12.1, 1H), 4.30 (d, *J* = 12.0, 1H), 4.07 (m, 1H), 3.62 (m, 1H), 3.54 (m, 1H), 3.23 (dd, *J* = 3.0, 9.6, 1H), 3.14 (dd, *J* = 3.8, 9.6, 1H), 2.97 (m, 2H), 2.88 (dt, *J* = 3.8, 7.9, 1H), 2.70 (dd, *J* = 3.5, 9.6, 1H), 2.40 (dd, *J* = 8.4, 12.9, 1H), 2.24 (dd, *J* = 6.2, 13.0, 1H), 2.08 (m, 1H), 1.86 (m, 1H), 1.84 (s, 3H), 1.64 (m, 1H), 1.53 (m, 2H), 1.31 (m, 2H). <sup>13</sup>C NMR δ 174.3, 170.0, 137.8, 136.5,

128.6, 128.1, 127.9, 127.6, 122.2, 122.1, 119.5, 118.9, 113.2, 111.4, 69.2, 68.1, 56.4, 52.6, 47.3, 47.2, 38.9, 38.8, 29.6, 25.3, 24.5, 23.3. HRMS (FAB<sup>+</sup>) calcd for C<sub>28</sub>H<sub>37</sub>N<sub>4</sub>O<sub>3</sub> [M + H]<sup>+</sup> *m/z* = 477.2866, found *m/z* = 477.2841. **26b**: <sup>1</sup>H NMR δ 8.05 (br, 1H), 7.57 (d, *J* = 7.9, 1H), 7.38 (m, 2H), 7.32 (m, 3H), 7.28 (dd, *J* = 0.6, 8.0, 1H), 7.17 (dt, *J* = 1.0, 7.2, 1H), 7.09 (dt, *J* = 0.7, 7.4, 1H), 6.92 (d, *J* = 1.8, 1H), 6.62 (t, *J* = 5.2, 1H), 5.43 (br, 1H), 4.45 (d, *J* = 11.4, 1H), 4.42 (d, *J* = 12.0, 1H), 4.14 (m, 1H), 3.72 (m, 1H), 3.53 (m, 1H), 3.32 (dd, *J* = 3.0, 9.6, 1H), 3.30 (dd, *J* = 4.4, 9.3, 1H), 3.04 (m, 2H), 2.94 (m, 1H), 2.73 (dd, *J* = 3.6, 9.8, 1H), 2.58 (dd, *J* = 10.6, 12.9, 1H), 2.26 (dd, *J* = 3.8, 13.2, 1H), 1.85 (m, 1H), 1.82 (m, 1H), 1.62 (m, 1H), 1.54 (s, 3H), 1.52 (m, 1H), 1.30 (m, 2H). <sup>13</sup>C NMR δ 174.6, 170.3, 138.0, 136.4, 128.7, 128.2, 128.1, 127.2, 122.4, 122.3, 119.6, 118.7, 113.0, 111.5, 73.5, 70.9, 67.7, 57.9, 51.5, 46.8, 39.2, 29.6, 25.2, 24.3, 23.3, 23.0. HRMS (ESI<sup>+</sup>) calcd for C<sub>28</sub>H<sub>37</sub>N<sub>4</sub>O<sub>3</sub> [M + H]<sup>+</sup> *m/z* = 477.2866, found *m/z* = 477.2848.

**Ac-L-Ser(PO(O*t*Bu)<sub>2</sub>)-Ψ[CH<sub>2</sub>N]-(*R/S*)Pip-2-(indol-3-yl)-ethylamine, 28a and 28b.** Ac-L-Ser(OBn)-Ψ[CH<sub>2</sub>N]-(\*)Pip-2-(indol-3-yl)-ethylamine **26a** (38 mg, 0.080 mmol) was dissolved in MeOH (5 mL), and 10% Pd/C (20 mg) and ammonium formate (150 mg) were added. The reaction was heated at reflux for 5 h. After filtration through Celite and washing with MeOH, evaporation yielded **27a** (25 mg, 81%) as a slightly yellow oil. To the crude **27a** (25 mg, 0.065 mmol) in THF (5 mL) was added 5-ethylthio-H-tetrazole (34 mg, 0.26 mmol) and di-*tert*-butyl diisopropylphosphoramidite (72 mg, 0.26 mmol) at rt, and the mixture was stirred at rt for 8 h. The mixture was cooled to -40 °C and *t*-BuOOH (5–6 M in decane, 47 μL, 0.26 mmol) was added slowly and the mixture was stirred at rt for 30 min. The reaction was cooled to -40 °C,

and quenched by addition of saturated aq  $\text{Na}_2\text{S}_2\text{O}_3$ . The mixture was extracted with  $\text{CH}_2\text{Cl}_2$  (20 mL  $\times$  2), and the combined organic extracts were dried over  $\text{Na}_2\text{SO}_4$ . Concentration under vacuum provided a residue, which was purified by chromatography (step gradient: 0% then 9% *i*-PrOH/EtOAc) to give **28a** as a colorless oil (18 mg, 48%).  $^1\text{H}$  NMR  $\delta$  9.00 (br, 1H), 7.64 (d,  $J = 7.9$ , 1H), 7.38 (d,  $J = 7.8$ , 1H), 7.17 (dt,  $J = 1.2, 7.6$ , 1H), 7.10 (dt,  $J = 0.8, 7.4$ , 1H), 6.92 (m, 1H), 5.83 (d,  $J = 8.0$ , 1H), 4.05 (m, 1H), 3.75 (m, 2H), 3.62 (m, 1H), 3.42 (m, 1H), 3.05 (m, 2H), 2.84 (m, 1H), 2.75 (dd,  $J = 3.4, 8.7$ , 1H), 2.33 (dd, 1H), 2.27 (dd, 1H), 2.15 (t, 1H), 1.82 (s, 3H), 1.79 (m, 1H), 1.59 (m, 2H), 1.49 (s, 18H), 1.46 (m, 1H), 1.31 (m, 2H).  $^{13}\text{C}$  NMR  $\delta$  173.8, 170.2, 136.6, 127.6, 122.4, 122.1, 119.4, 119.0, 113.0, 111.6, 83.4, 67.9, 66.3, 55.7, 51.8, 47.4, 38.8, 30.0, 28.8, 25.2, 24.0, 23.3, 23.1.  $^{31}\text{P}$ :  $\delta$  -8.53.  $^{31}\text{P}$  NMR  $\delta$  -8.53. HRMS (FAB $^+$ ) calcd for  $\text{C}_{29}\text{H}_{48}\text{N}_4\text{O}_6\text{P}$   $[\text{M} + \text{H}]^+$   $m/z = 579.3311$ , found  $m/z = 579.3265$ . By a similar procedure, **28b** was obtained as a colorless oil (12 mg, 40%).  $^1\text{H}$  NMR  $\delta$  10.22 (s, 1H), 7.58 (d,  $J = 7.9$ , 1H), 7.41 (d,  $J = 8.4$ , 1H), 7.17 (m, 1H), 7.10 (m, 1H), 7.06 (br, 1H), 6.43 (br, 1H), 5.01 (d,  $J = 5.9$ , 1H), 4.22 (br, 1H), 3.86 (m, 2H), 3.78 (m, 1H), 3.56 (m, 1H), 3.18 (m, 1H), 3.13 (m, 1H), 3.05 (m, 1H), 2.67 (dd,  $J = 3.4, 10.8$ , 1H), 2.58 (m, 1H), 2.05 (dd,  $J = 3.3, 13.0$ , 1H), 1.92 (m, 1H), 1.82 (m, 2H), 1.67 (m, 1H), 1.52 (m, 21H), 1.48 (m, 1H), 1.37 (m, 1H), 1.22 (m, 1H).  $^{13}\text{C}$  NMR  $\delta$  174.8, 170.6, 136.8, 127.1, 122.6, 122.2, 119.4, 118.7, 112.5, 112.1, 83.5, 68.3, 67.5, 58.1, 52.0, 46.1, 39.2, 30.8, 30.0, 25.0, 24.8, 23.4, 22.3.  $^{31}\text{P}$ -NMR  $\delta$  -9.26. HRMS (FAB $^+$ ) calcd for  $\text{C}_{29}\text{H}_{48}\text{N}_4\text{O}_6\text{P}$   $[\text{M} + \text{H}]^+$   $m/z = 579.3311$ , found  $m/z = 579.3351$ .

**Ac-L-Ser(PO(OH)<sub>2</sub>)-Ψ[CH<sub>2</sub>N]-(R/S)Pip-2-(indol-3-yl)-ethylamine, 4a and 4b.** To a solution of **28a** (15 mg, 0.026 mmol) in CH<sub>2</sub>Cl<sub>2</sub> (4 mL) was added a mixture of TFA (1 mL), H<sub>2</sub>O (0.04 mL), and *i*-Pr<sub>3</sub>SiH (0.04 mL), and the reaction was stirred at rt for 1h. The solvent was removed under vacuum, and the residue was purified by semi-preparative HPLC (5% CH<sub>3</sub>CN/H<sub>2</sub>O for 5 min, then 5% to 30% CH<sub>3</sub>CN/H<sub>2</sub>O gradient over 10 min, 12 mL/min) to provide **4a** at 9.5 min, as a white solid after lyophilization (8.0 mg, 66%). Anal. HPLC: gradient 10% B for 3 min, then 10–90% B over 6 min (A: 0.1% HCO<sub>2</sub>H/H<sub>2</sub>O, B: 0.1% HCO<sub>2</sub>H/CH<sub>3</sub>CN), 254 nm, 6.5 min, 97%. <sup>1</sup>H NMR (CD<sub>3</sub>OD) δ 7.56 (d, *J* = 7.7, 1H), 7.35 (d, *J* = 8.3, 1H), 7.10 (s, 1H), 7.08 (t, *J* = 7.2, 1H), 7.00 (t, *J* = 7.5, 1H), 4.35 (m, 1H), 3.90 (m, 2H), 3.74 (m, 2H), 3.60 (m, 2H), 3.12 (m, 3H), 2.99 (t, *J* = 6.8, 2H), 2.00 (m, 1H), 1.97 (s, 3H), 1.78 (m, 4H), 1.52 (m, 1H). <sup>13</sup>C NMR (CD<sub>3</sub>OD) δ 174.1, 168.9, 138.2, 128.8, 123.7, 122.4, 120.0, 119.3, 112.7, 112.4, 65.8, 58.5, 57.5, 54.3, 48.2, 41.2, 29.5, 26.0, 23.7, 22.5, 21.6. <sup>31</sup>P NMR (CD<sub>3</sub>OD) δ 0.69. HRMS (ESI<sup>+</sup>) calcd for C<sub>21</sub>H<sub>32</sub>N<sub>4</sub>O<sub>6</sub>P [M + H]<sup>+</sup> *m/z* = 467.2059, found *m/z* = 467.2062. By a similar procedure, **4b** at 9.5 min, was obtained as a white solid (4 mg, 50%). Anal. HPLC: 6.5 min, 95%. <sup>1</sup>H NMR (400 MHz, CD<sub>3</sub>OD) δ 7.57 (d, *J* = 7.9, 1H), 7.37 (d, *J* = 8.1, 1H), 7.10 (m, 2H), 7.00 (t, *J* = 7.4, 1H), 4.39 (m, 1H), 3.90 (m, 3H), 3.58 (m, 3H), 3.12 (m, 1H), 2.94 (m, 4H), 2.00 (s, 3H), 1.92 (m, 2H), 1.80 (m, 1H), 1.69 (m, 2H), 1.51 (m, 1H). <sup>13</sup>C NMR (CD<sub>3</sub>OD) δ 176.1, 169.7, 138.2, 128.7, 123.9, 122.4, 119.6, 119.3, 112.6, 112.5, 67.9, 65.6, 60.7, 53.6, 47.8, 41.0, 30.3, 26.1, 24.2, 22.5, 22.4. <sup>31</sup>P NMR (202 MHz, CD<sub>3</sub>OD) δ 1.64. HRMS (ESI<sup>+</sup>) calcd for C<sub>21</sub>H<sub>32</sub>N<sub>4</sub>O<sub>6</sub>P [M + H]<sup>+</sup> *m/z* = 467.2059, found *m/z* = 467.2060.

## References



1. Roeske, R. W., Weitzel, F. L., Prasad, K. U., and Thompson, R. M. (1976) Selective Reduction of the Amide Carbonyl Group in Dipeptides by Borane, *J. Org. Chem.* *41*, 1260-1261.
2. Cushman, M., and Oh, Y.-I. (1991) Development of Methodology for the Synthesis of Stereochemically Pure Phe[CH<sub>2</sub>N]Pro Linkages in HIV Protease Inhibitors, *J. Org. Chem.* *56*, 4161-4167.
3. Papanikos, A., and Meldal, M. (2004)  $\alpha$ -Keto Amide Peptides: A Synthetic Strategy to Resin-Bound Peptide Isosteres for Protease Inhibitor Screening on Solid Support, *J. Comb. Chem.* *6*, 181-195.
4. Carpino, L. A. (1993) 1-Hydroxy-7-azabenzotriazole: an efficient coupling additive, *J. Am. Chem. Soc.* *115*, 4397-4398.
5. Perich, J. W., and Johns, R. B. (1988) Di-*t*-butyl *N,N*-diethylphosphoramidite and dibenzyl *N,N*-diethylphosphoramidite. Highly reactive reagents for the 'phosphite-triester' phosphorylation of serine-containing peptides, *Tetrahedron Lett.* *29*, 2369-2372.
6. Zhao, S., and Etzkorn, F. A. (2007) A phosphorylated prodrug for the inhibition of Pin1, *Bioorg. Med. Chem. Lett.* *17*, 6615-6618.
7. Still, W. C., Kahn, M., and Mitra, A. (1978) Rapid Chromatographic Technique for Preparative Separations with Moderate Resolution, *J. Org. Chem.* *43*, 2923-2925.

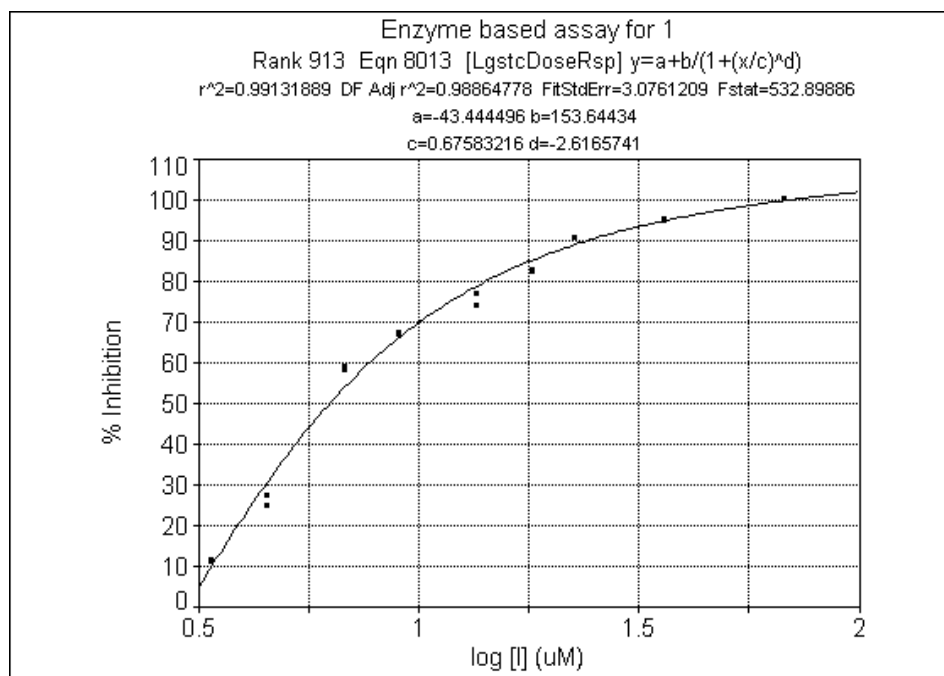

**Figure S1.** Dose response curve for inhibition of Pin1 by Fmoc–Ser(PO(OH)<sub>2</sub>)–Ψ[CH<sub>2</sub>N]–Pro–2-(indol-3-yl)-ethylamine **1** (IC<sub>50</sub> = 6.3 ± 0.4 μM).

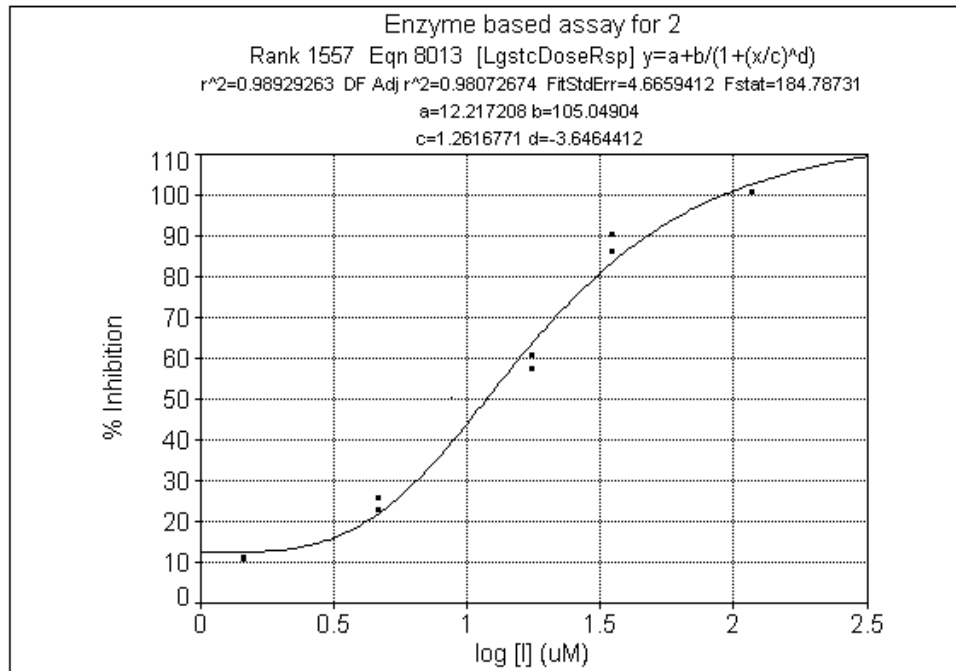

**Figure S2.** Dose response curve for inhibition of Pin1 by Ac–Ser(PO(OH)<sub>2</sub>)–Ψ[CH<sub>2</sub>N]–Pro–2-(indol-3-yl)-ethylamine **2** (IC<sub>50</sub> = 12 ± 2 μM).

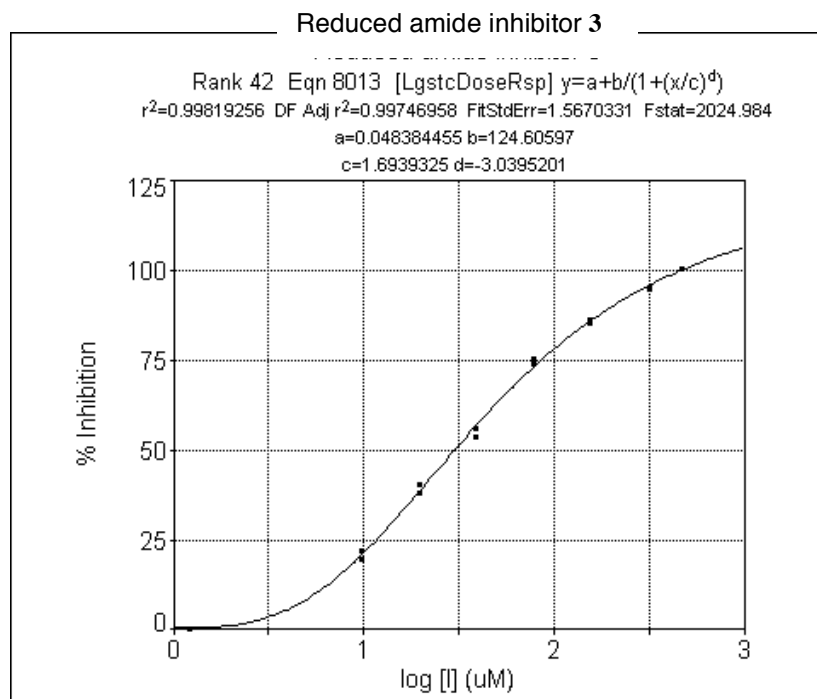

**Figure S3.** Dose response curve for inhibition of Pin1 by Fmoc–Thr(PO(OH)<sub>2</sub>)–Ψ[CH<sub>2</sub>N]–Pro–2-(indol-3-yl)-ethylamine **3** (IC<sub>50</sub> = 30 ± 2 μM).

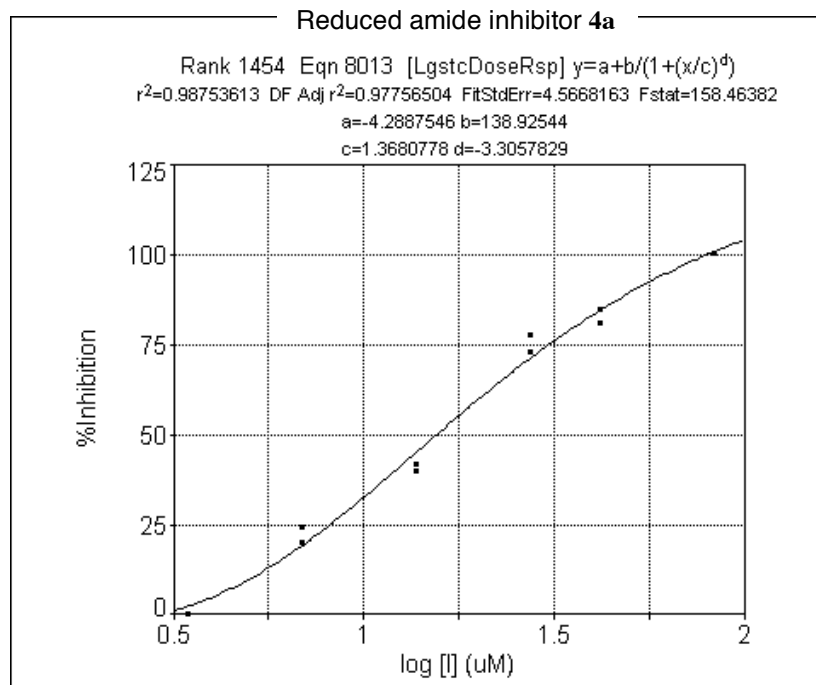

**Figure S4.** Dose response curve for inhibition of Pin1 by Ac-Ser(PO(OH)<sub>2</sub>)-Ψ[CH<sub>2</sub>N]-(\*)Pip-2-(indol-3-yl)-ethylamine **4a** (IC<sub>50</sub> = 16 ± 2 μM).

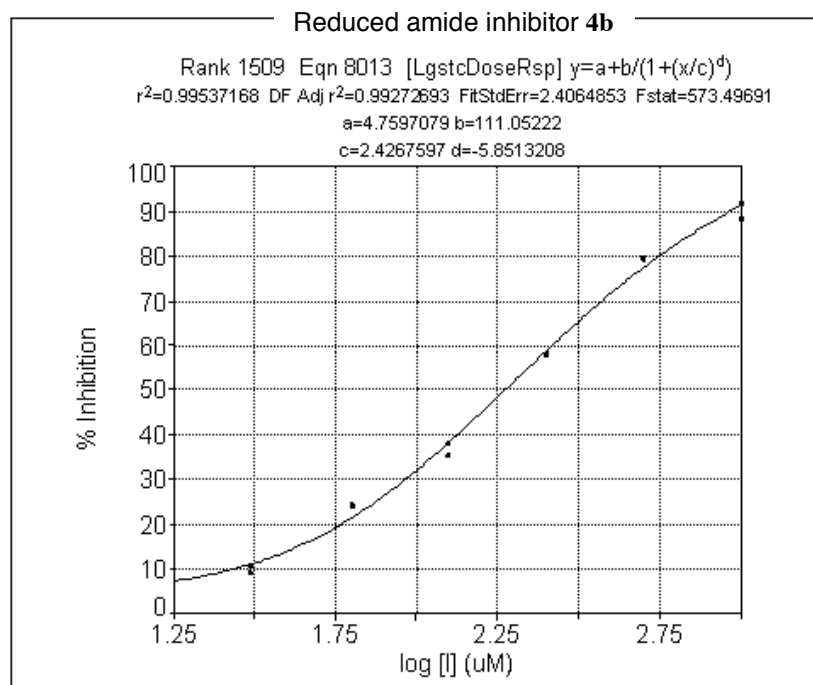

**Figure S5.** Dose response curve for inhibition of Pin1 by Ac-Ser(PO(OH)<sub>2</sub>)-Ψ[CH<sub>2</sub>N]-(\*)Pip-2-(indol-3-yl)-ethylamine **4b** (IC<sub>50</sub> = 190 ± 20 μM).

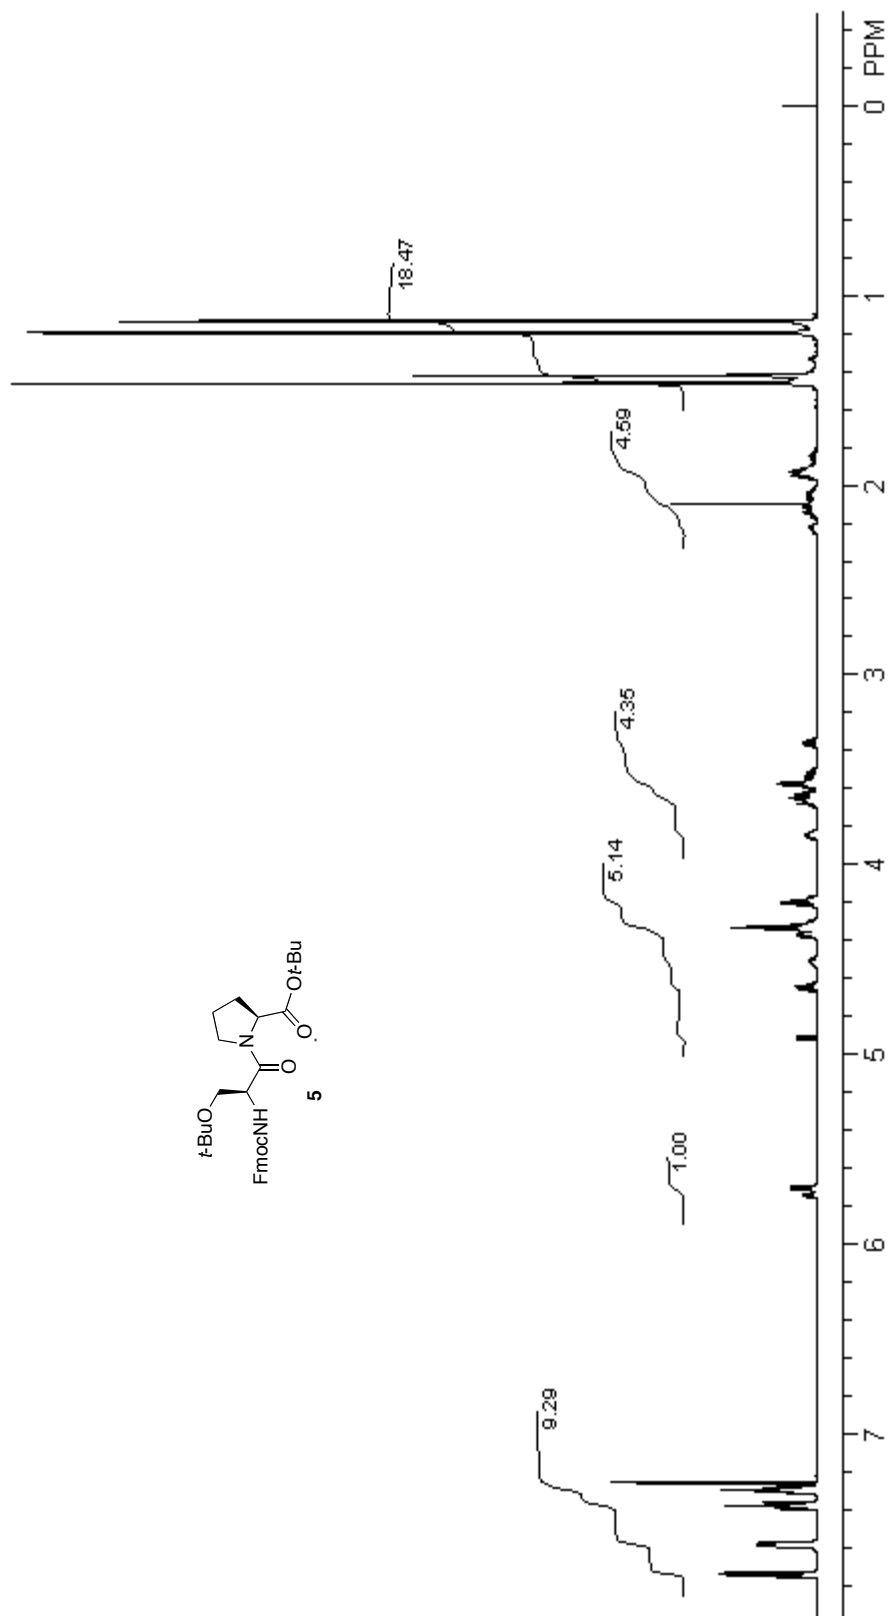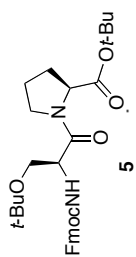

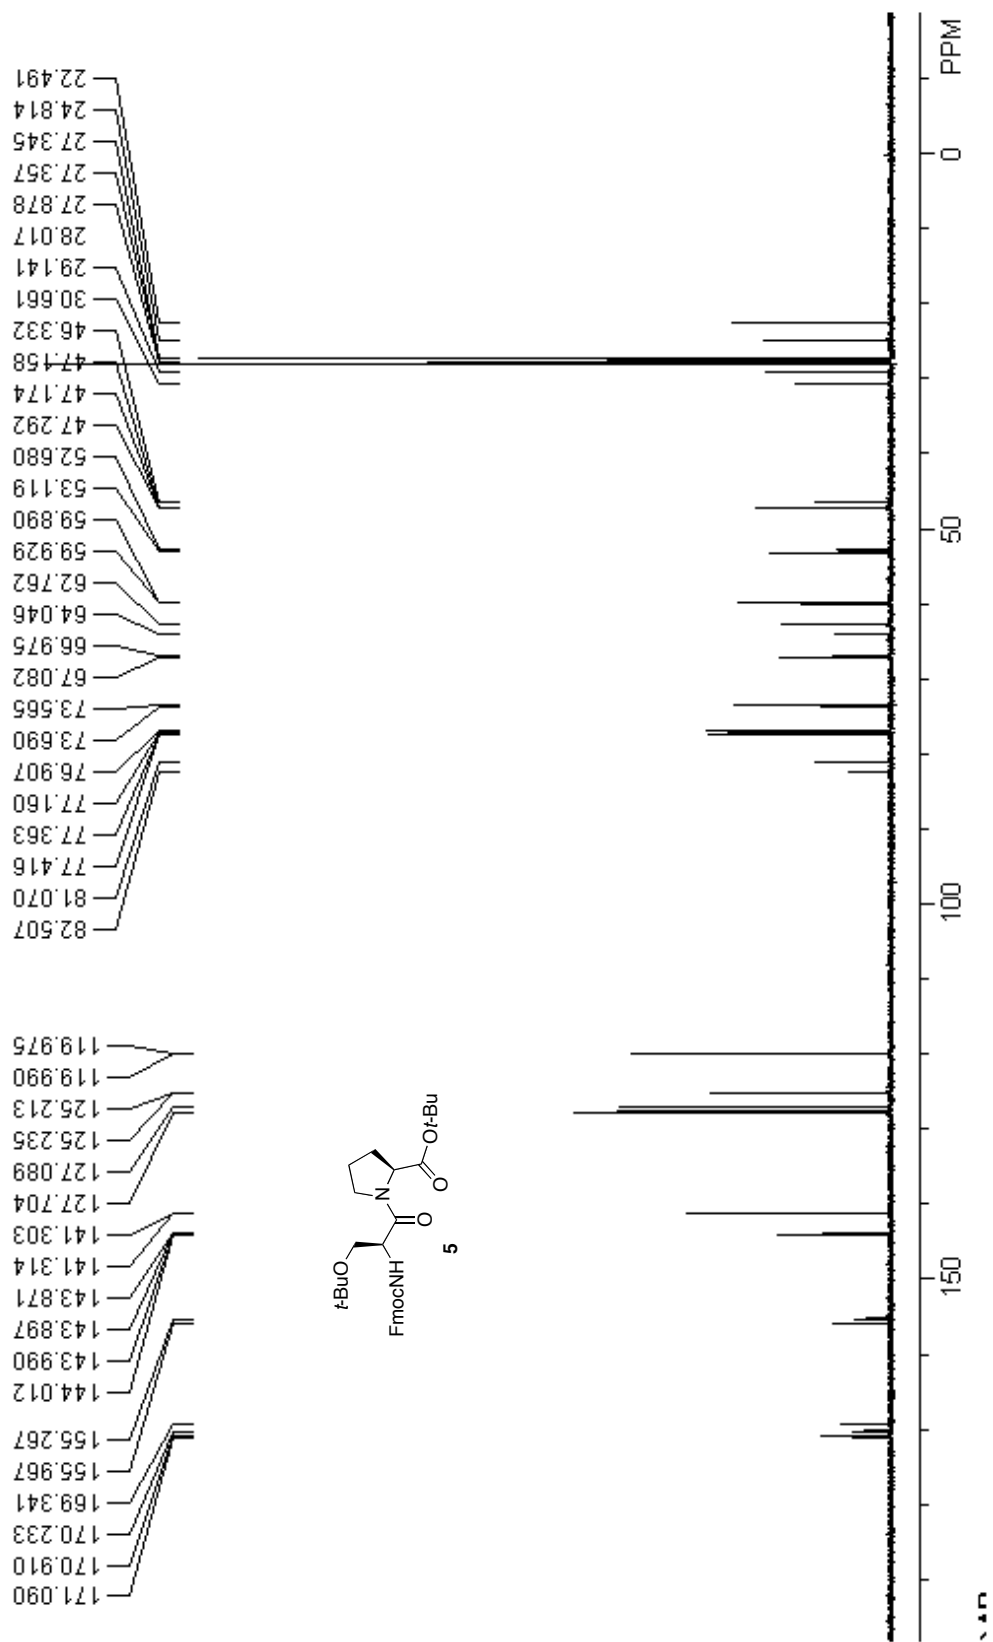

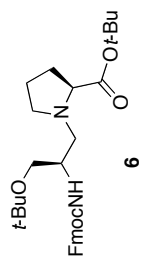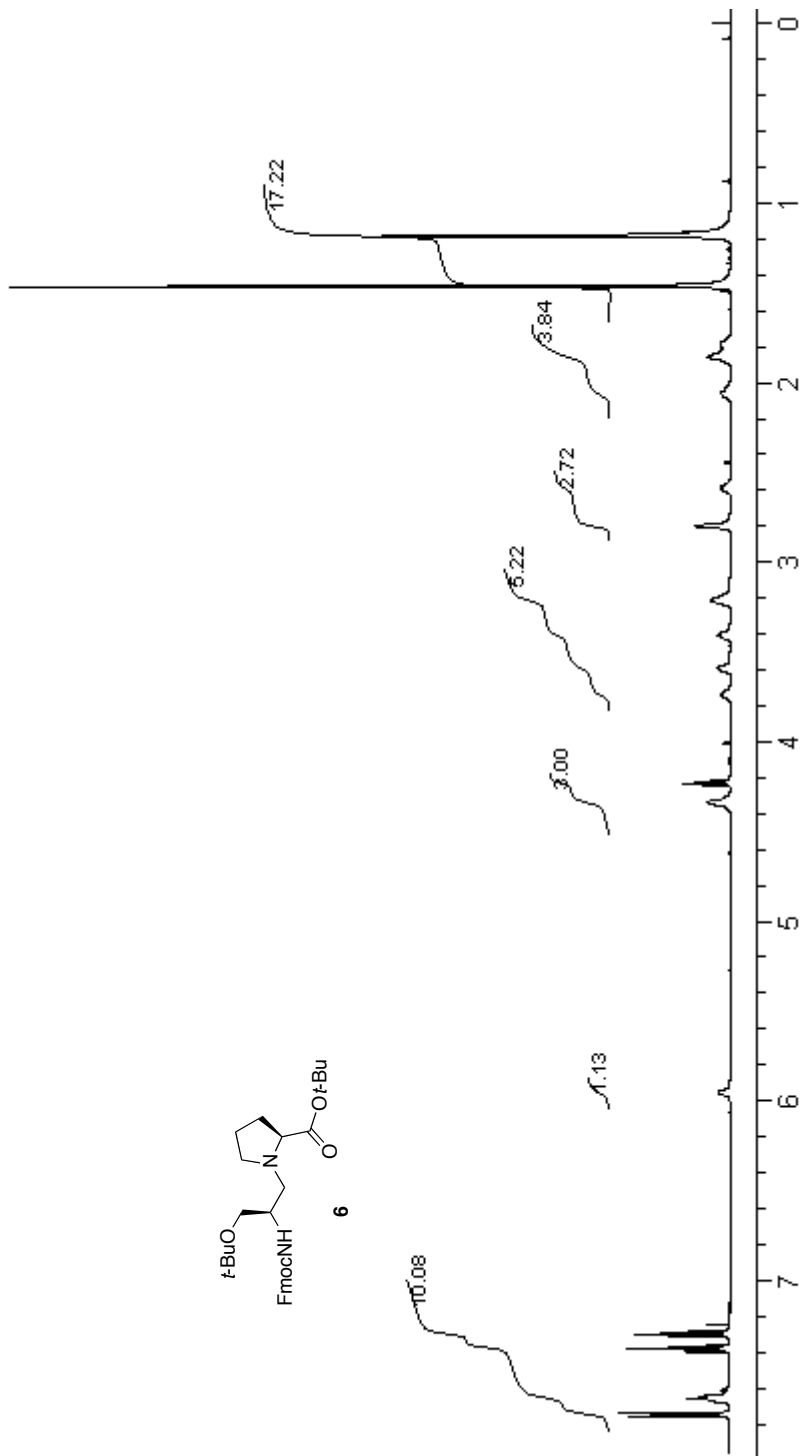

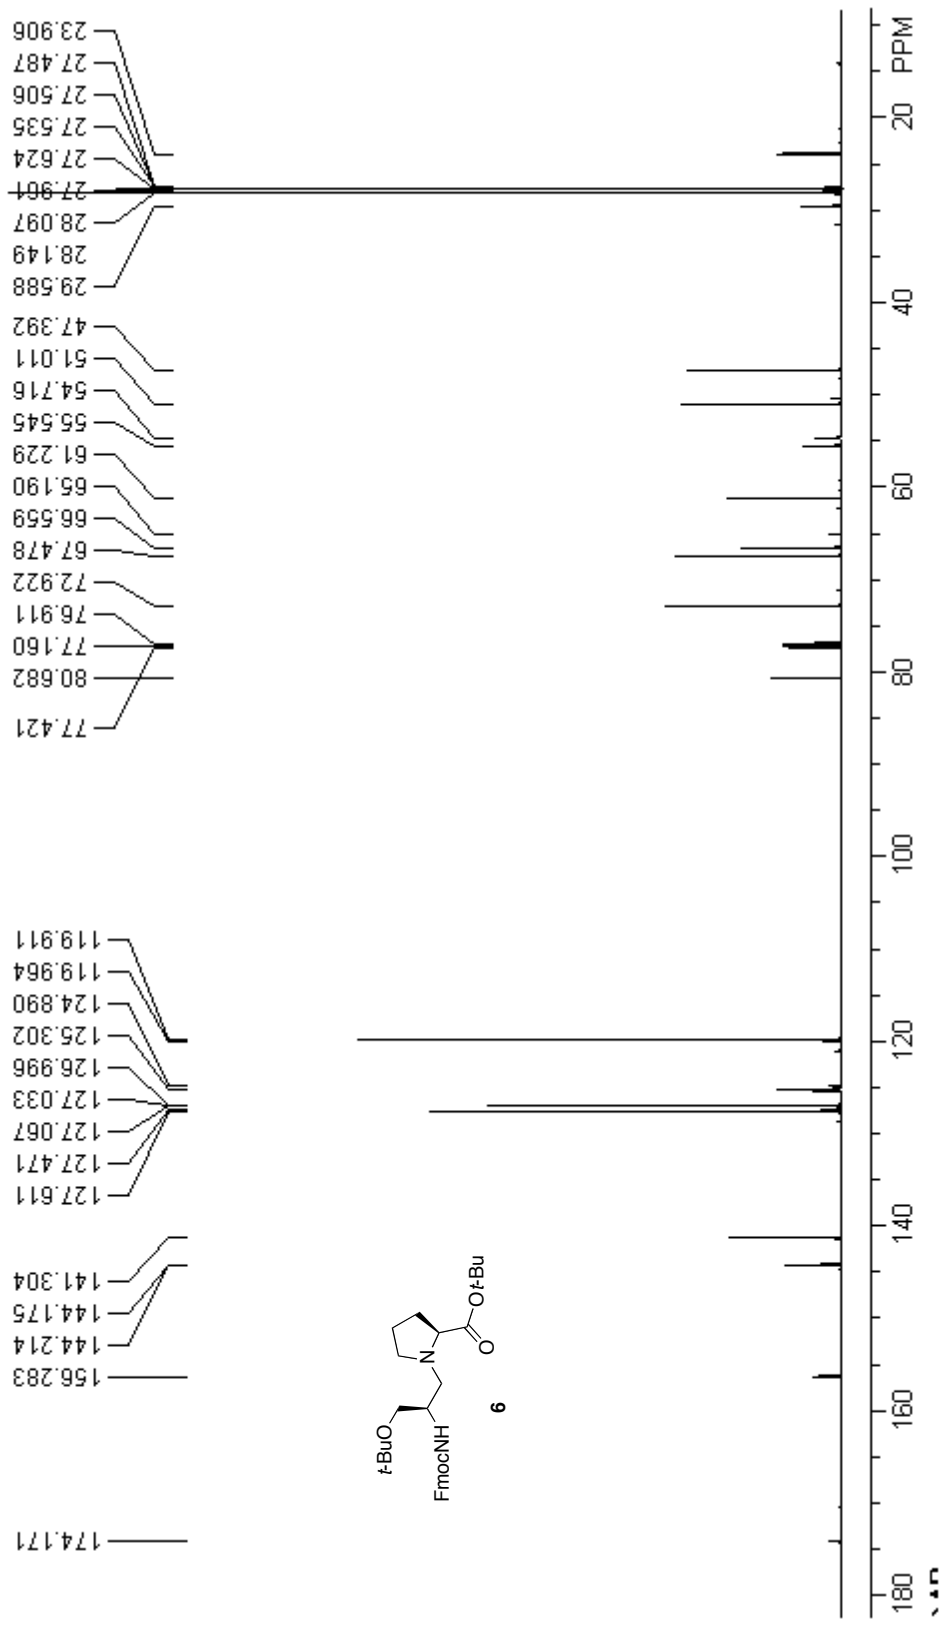



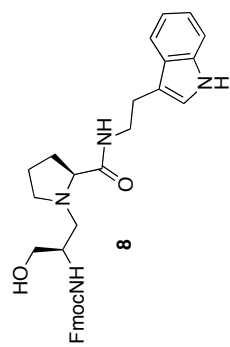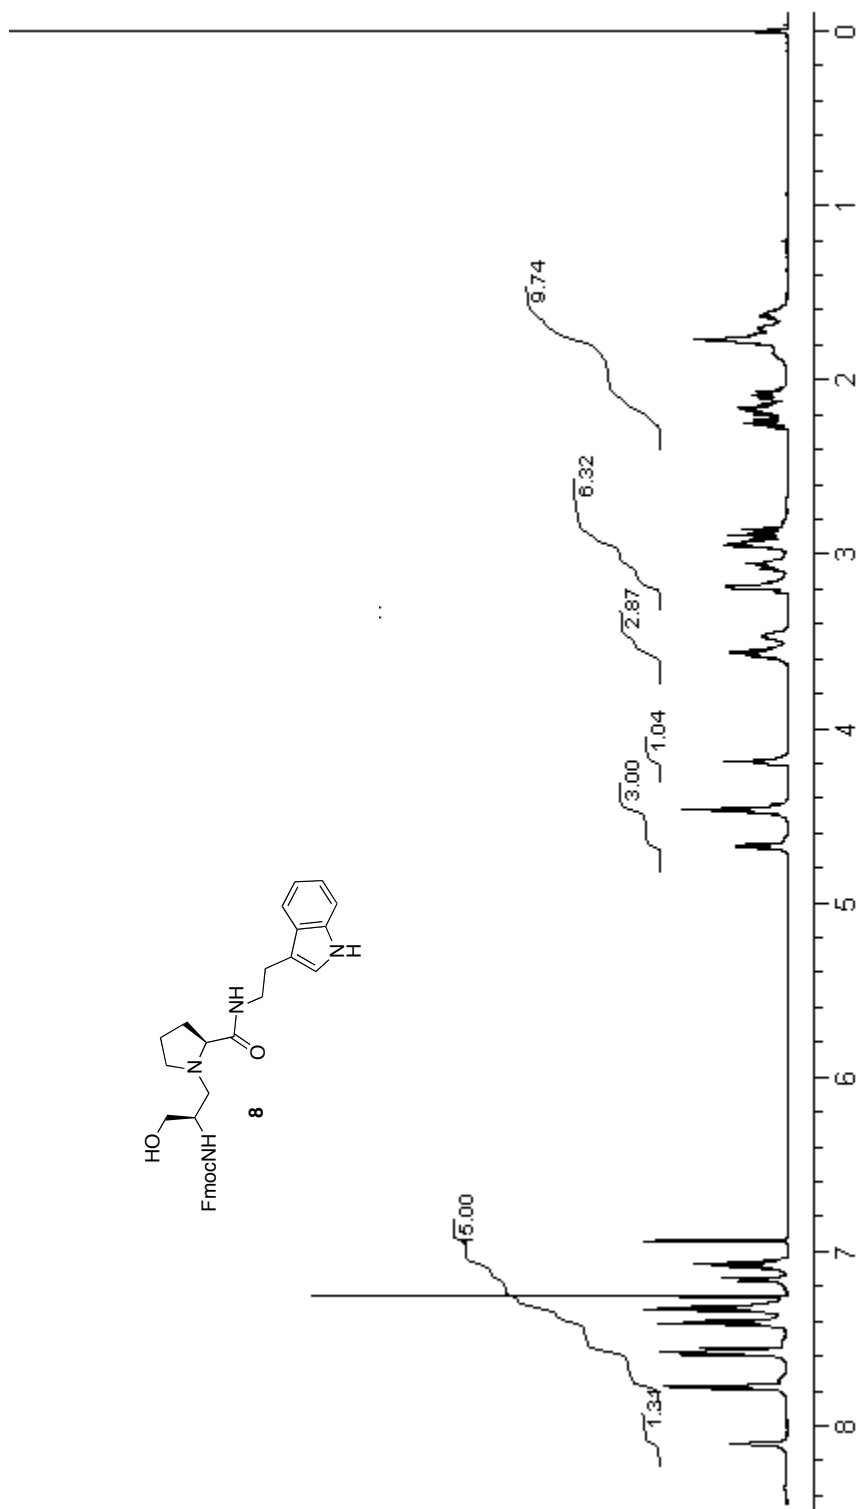

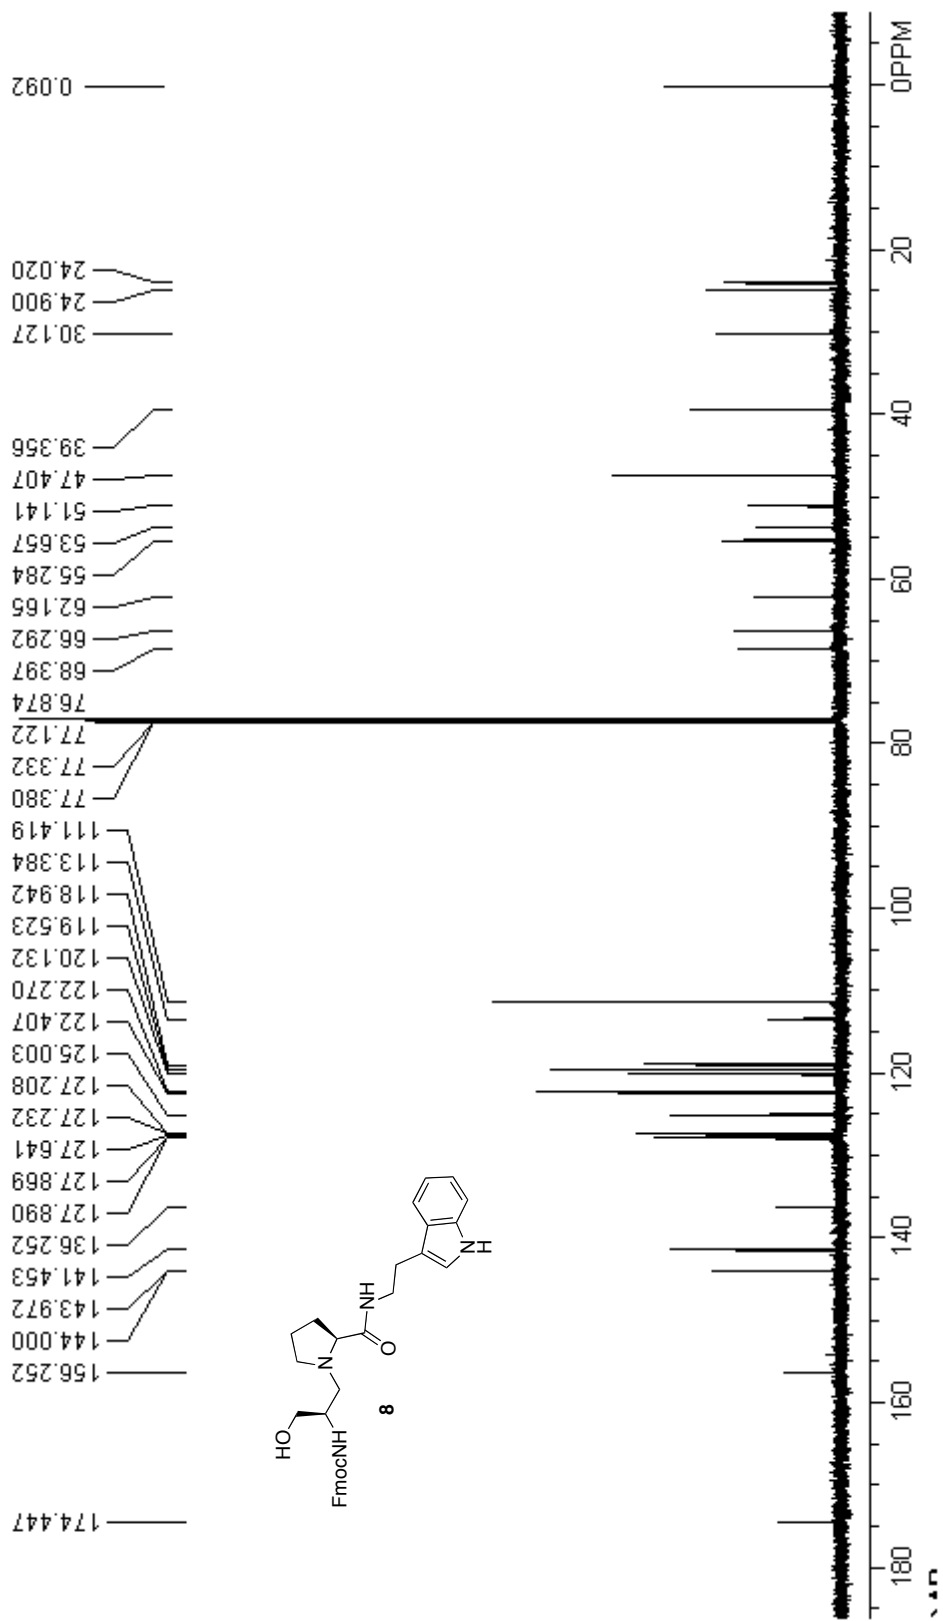

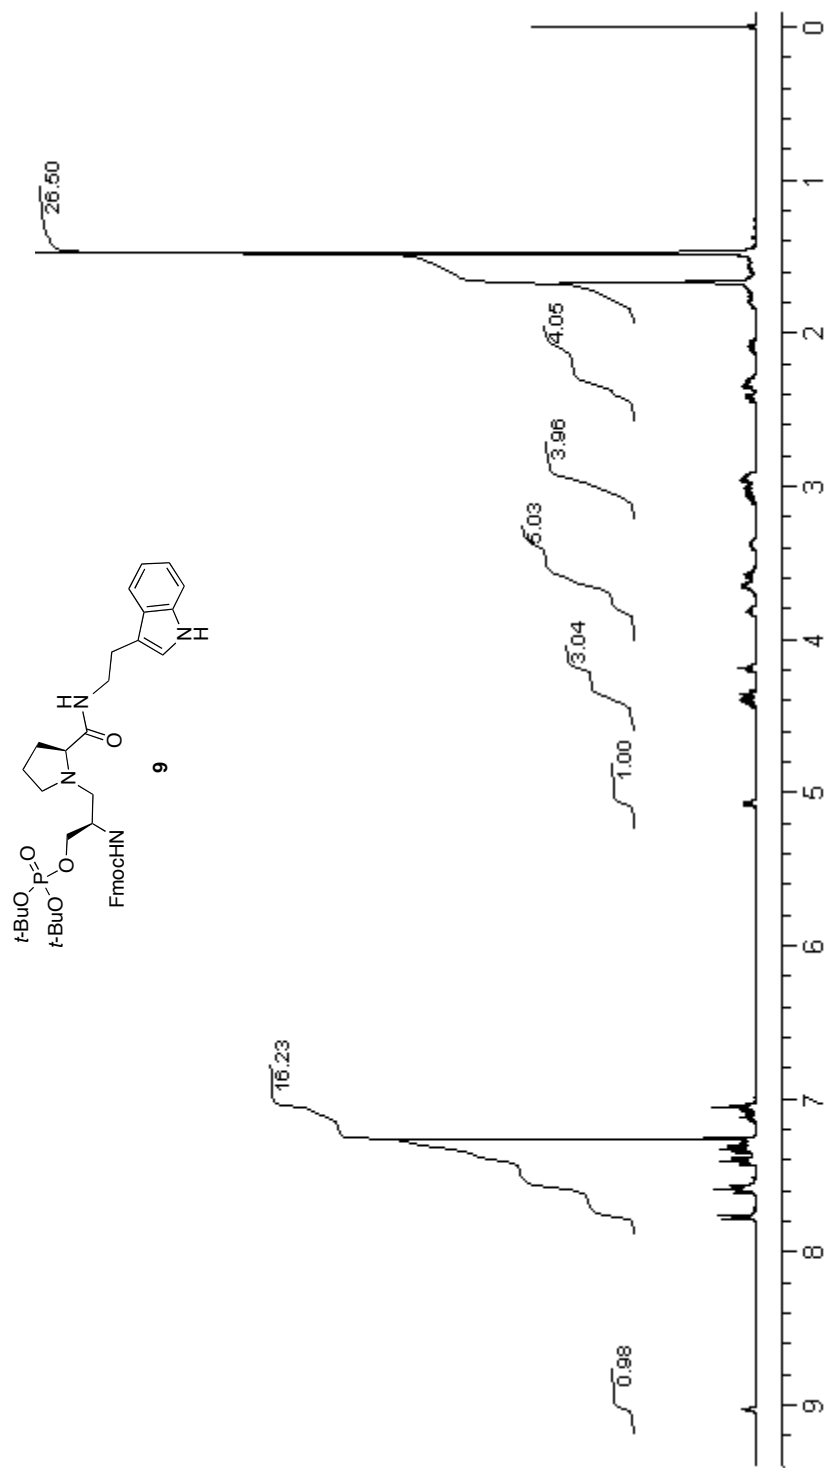

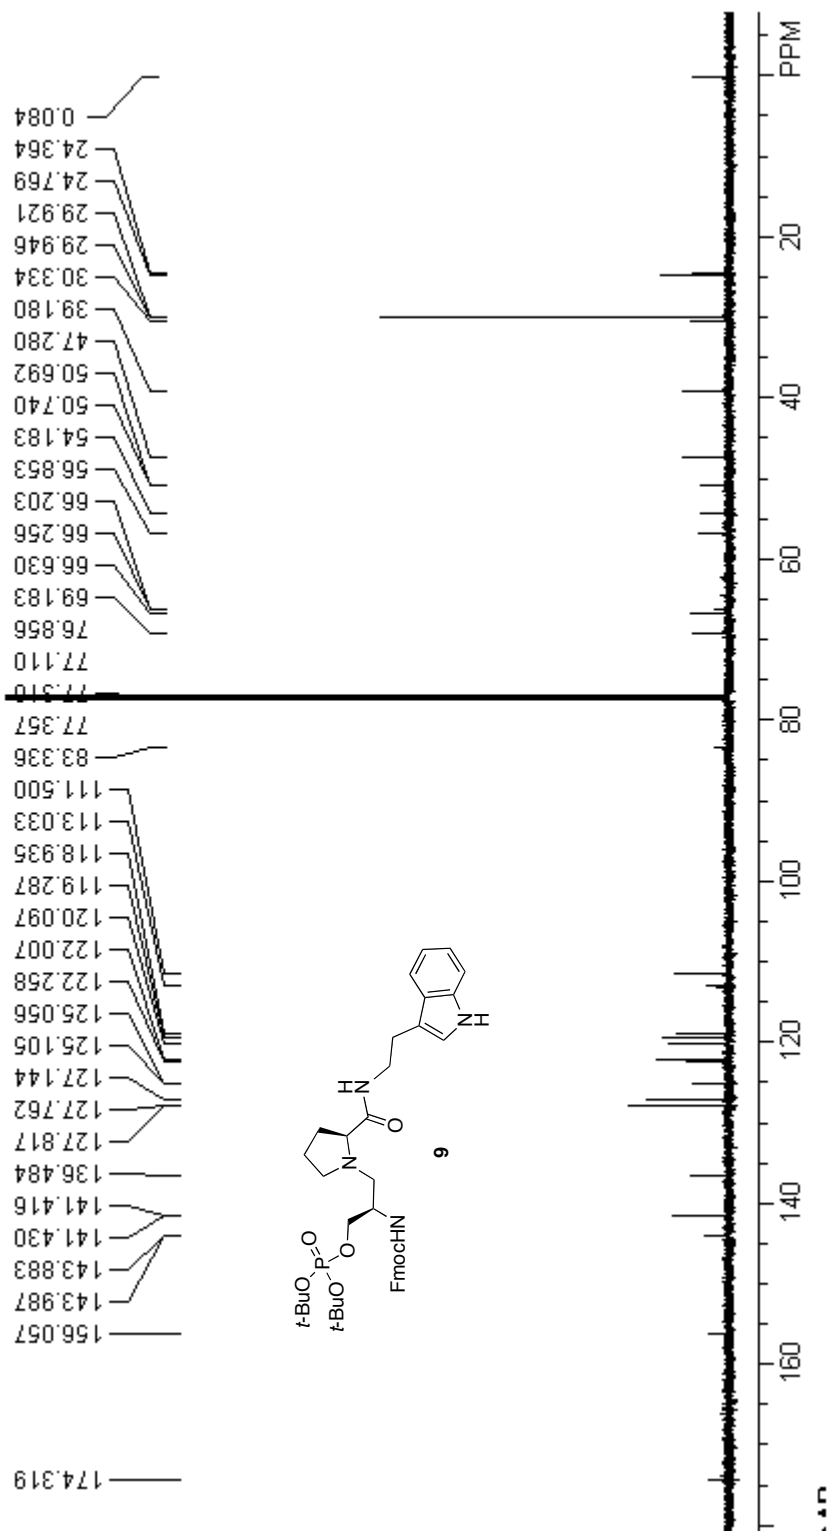

$^{31}\text{P}$  NMR

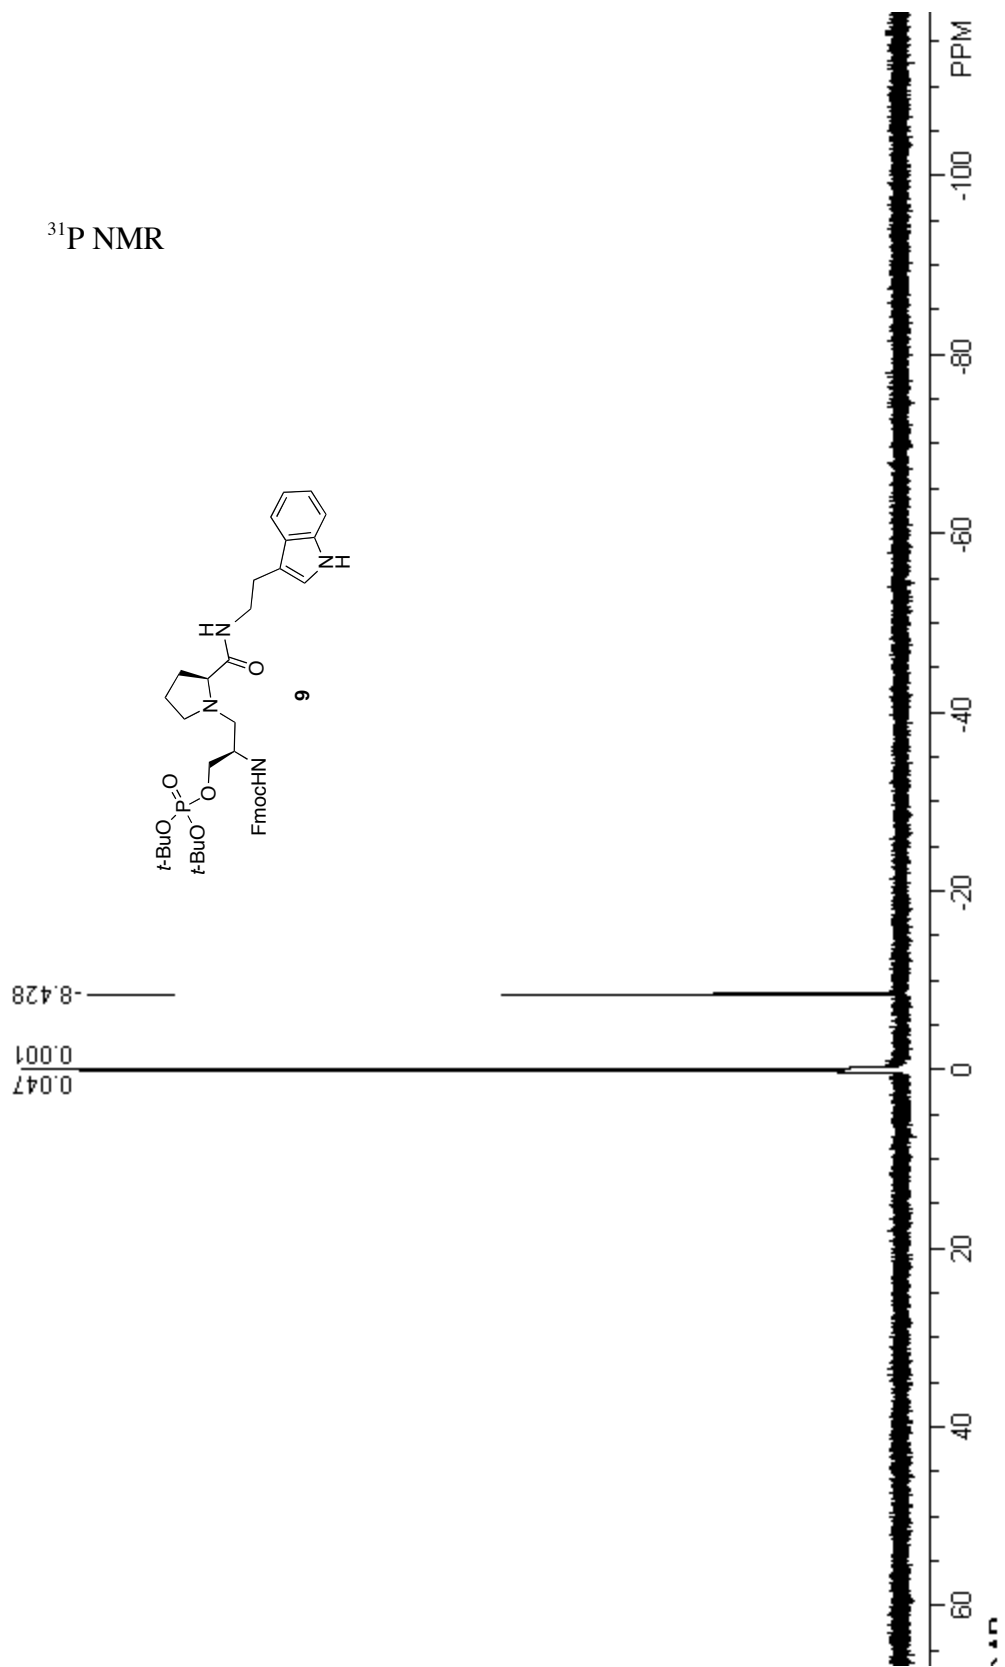

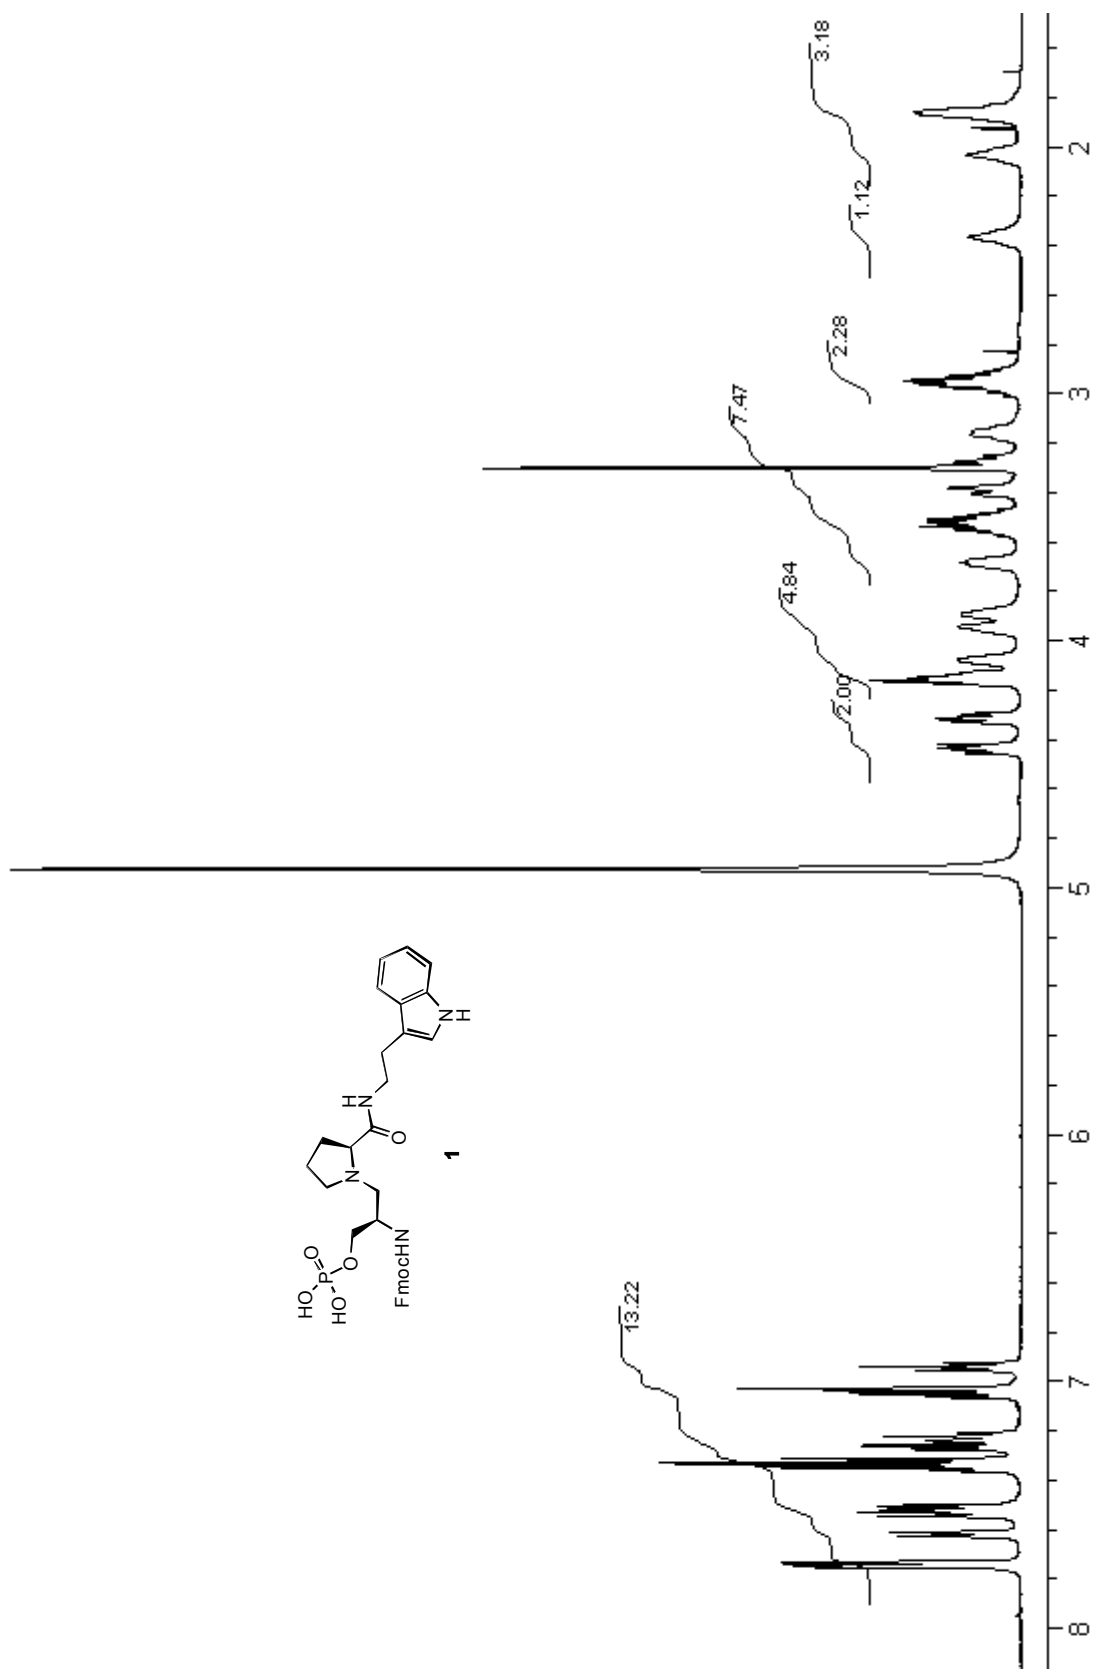

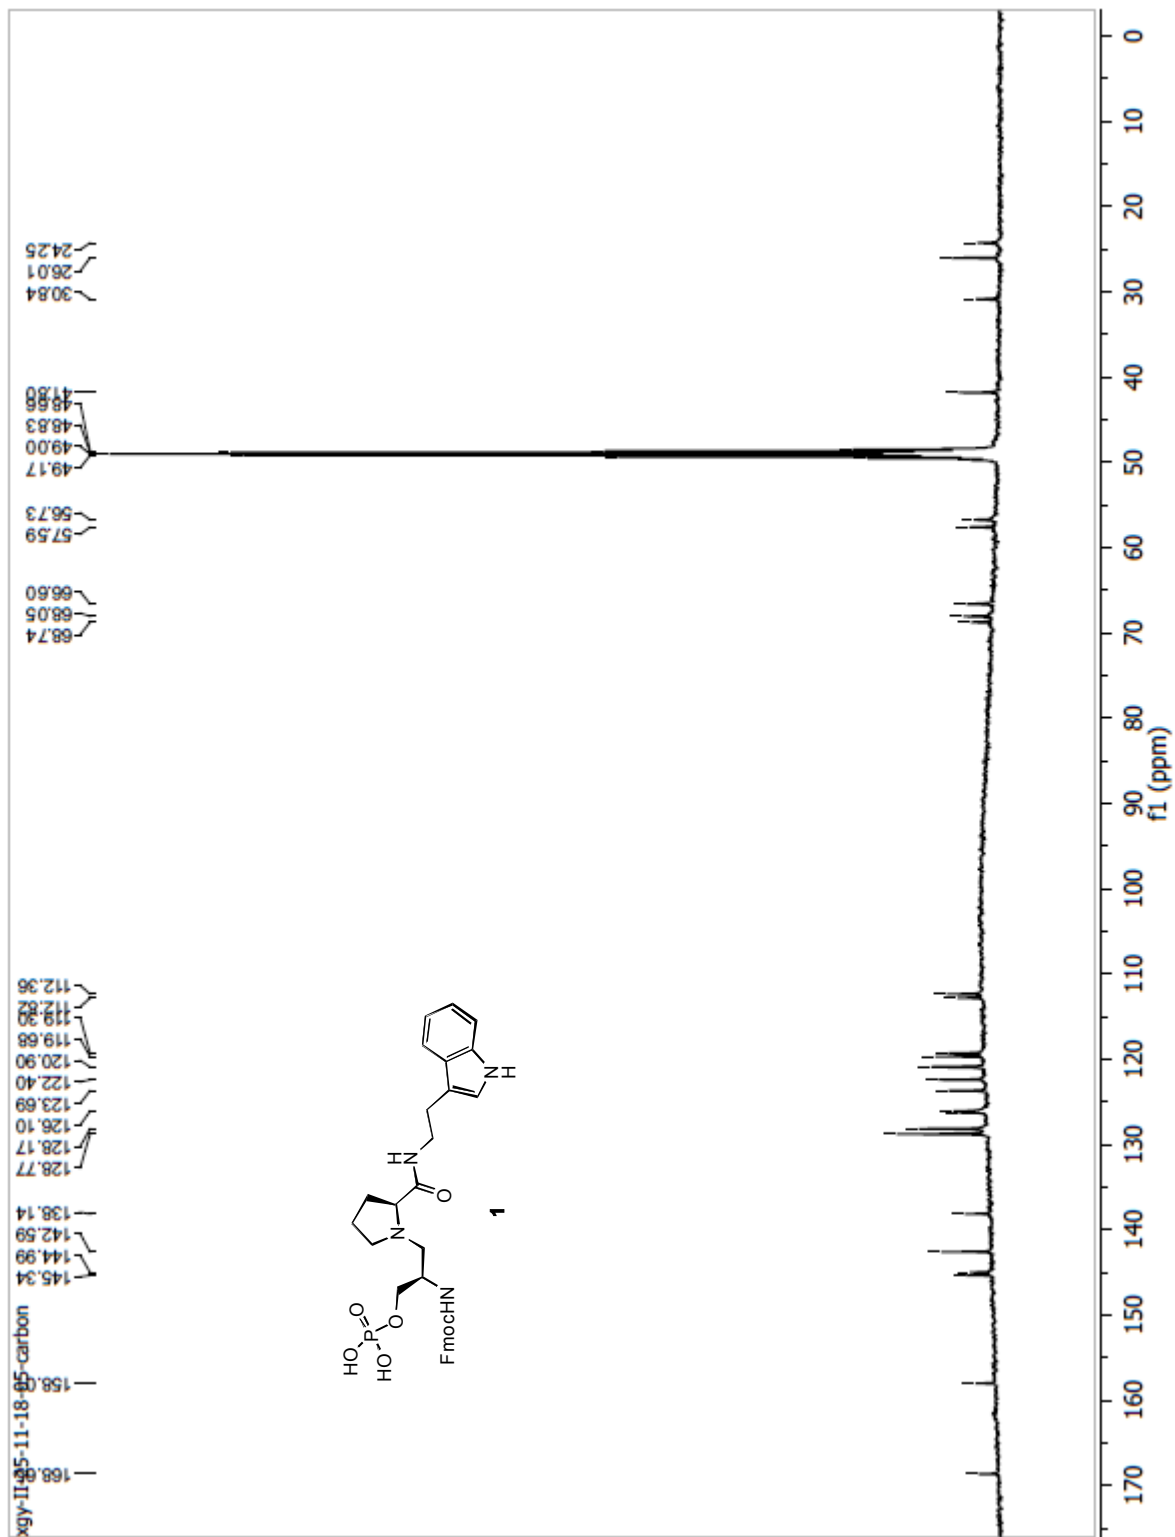





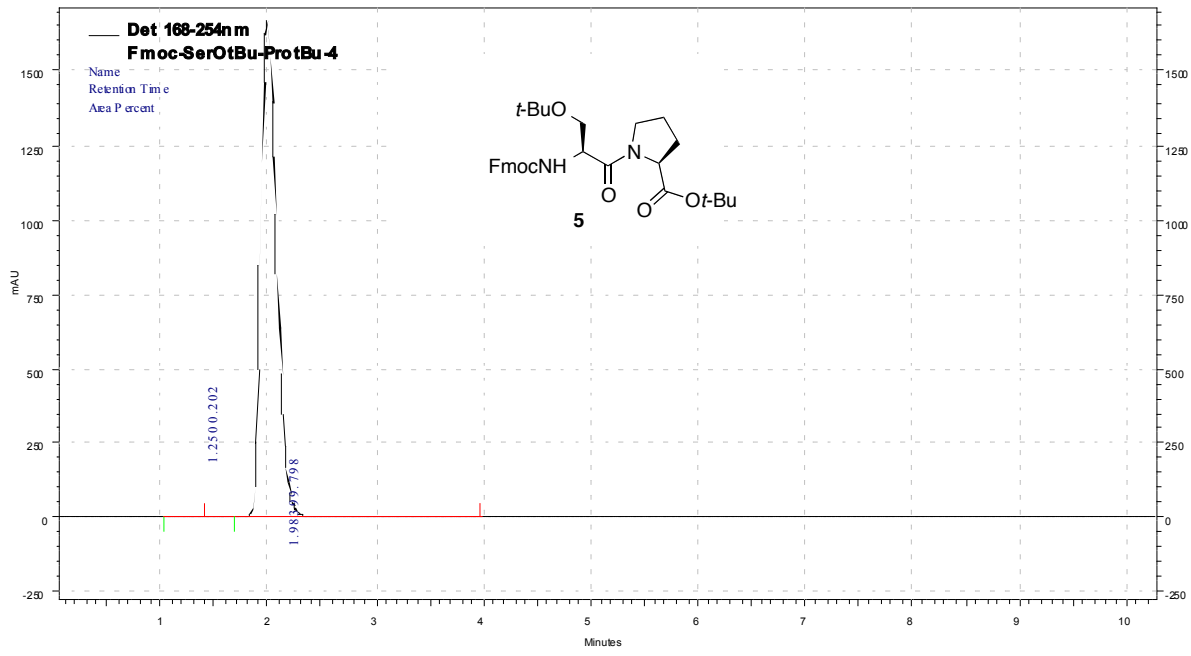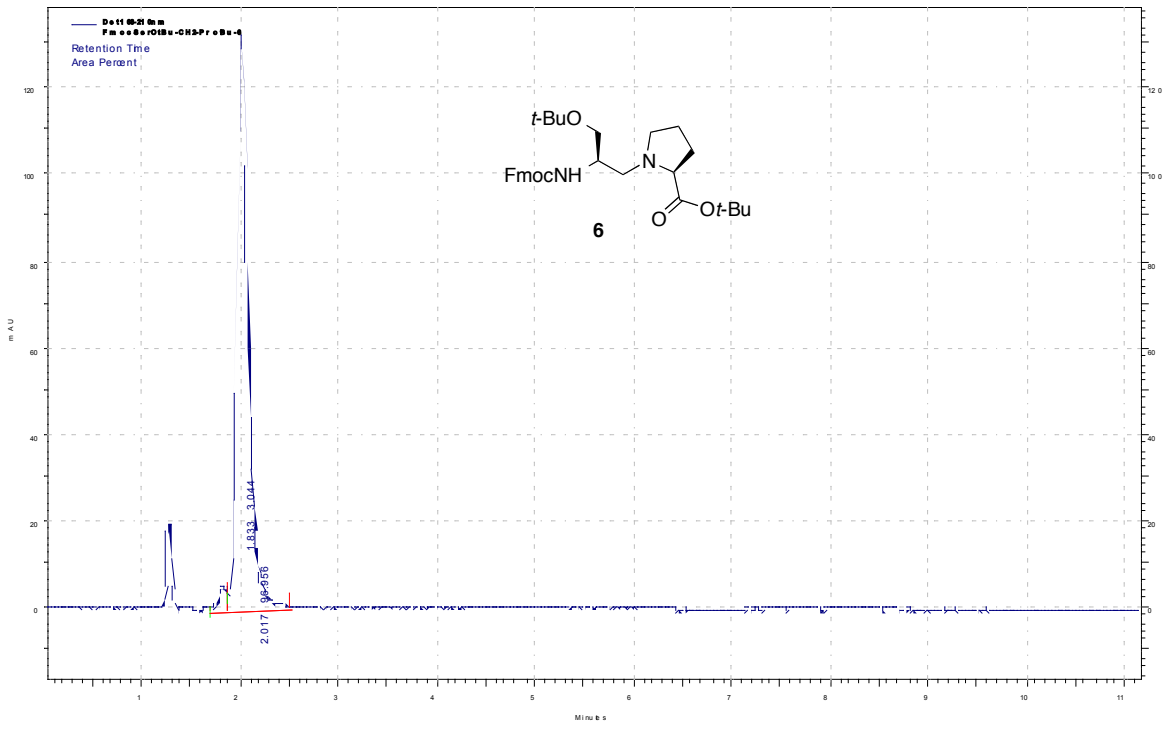

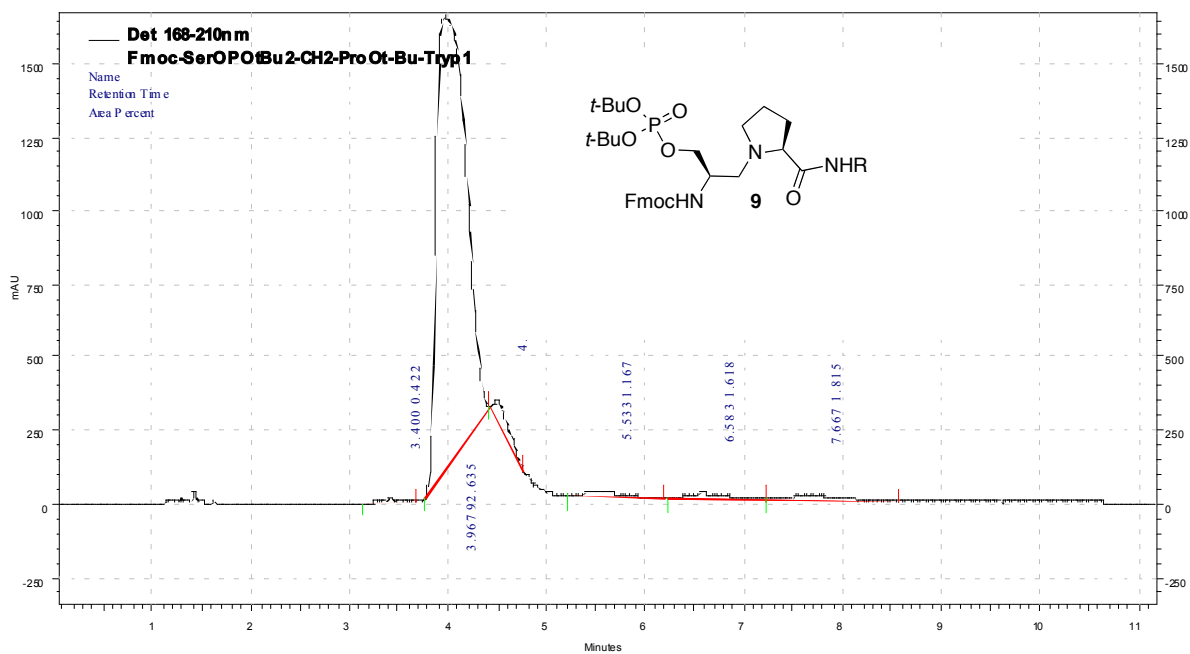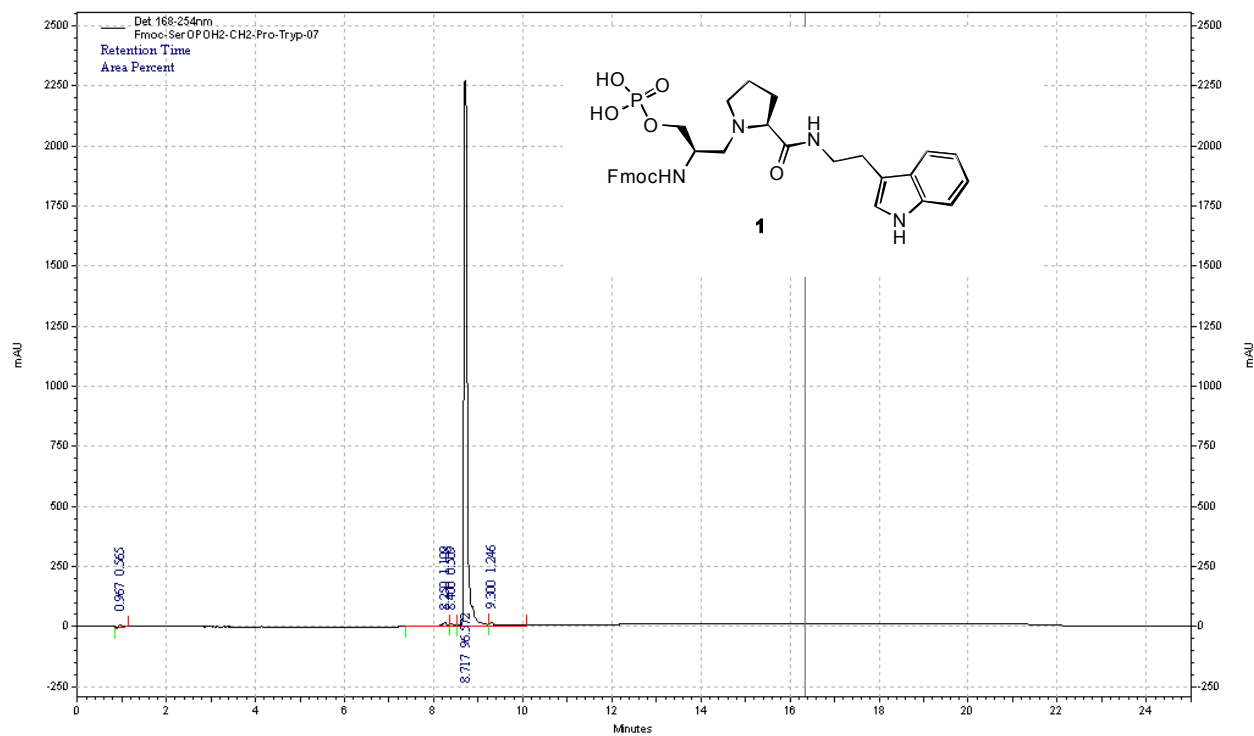

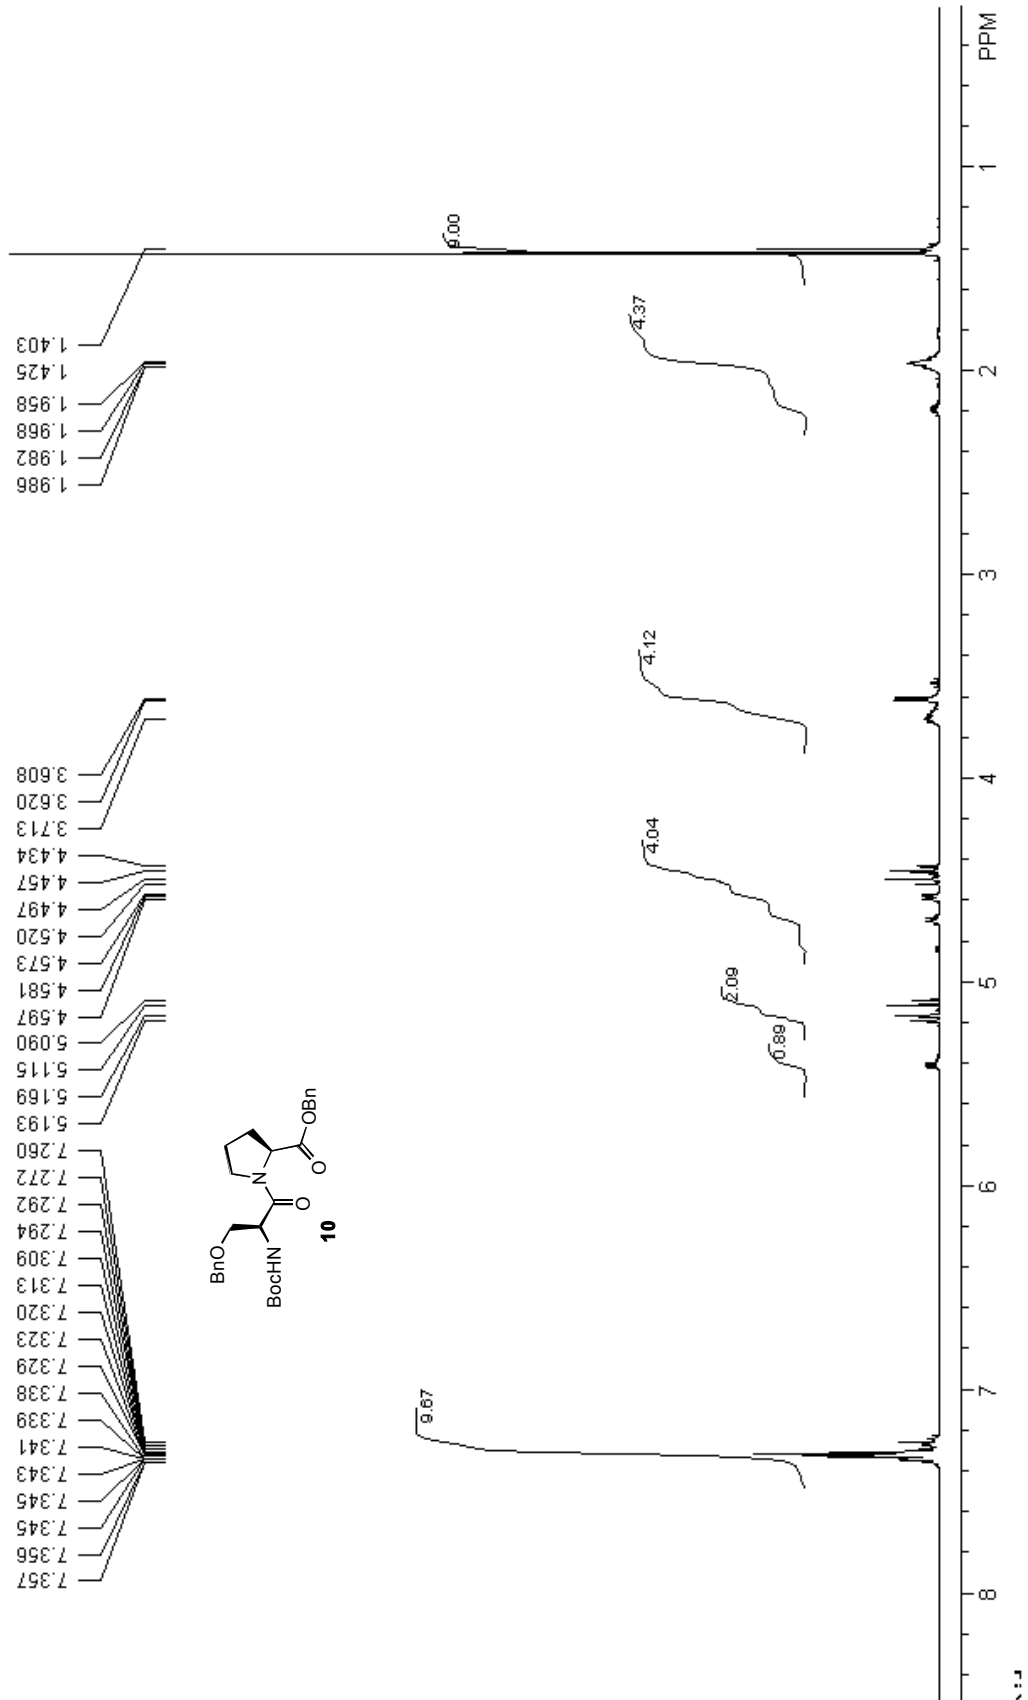

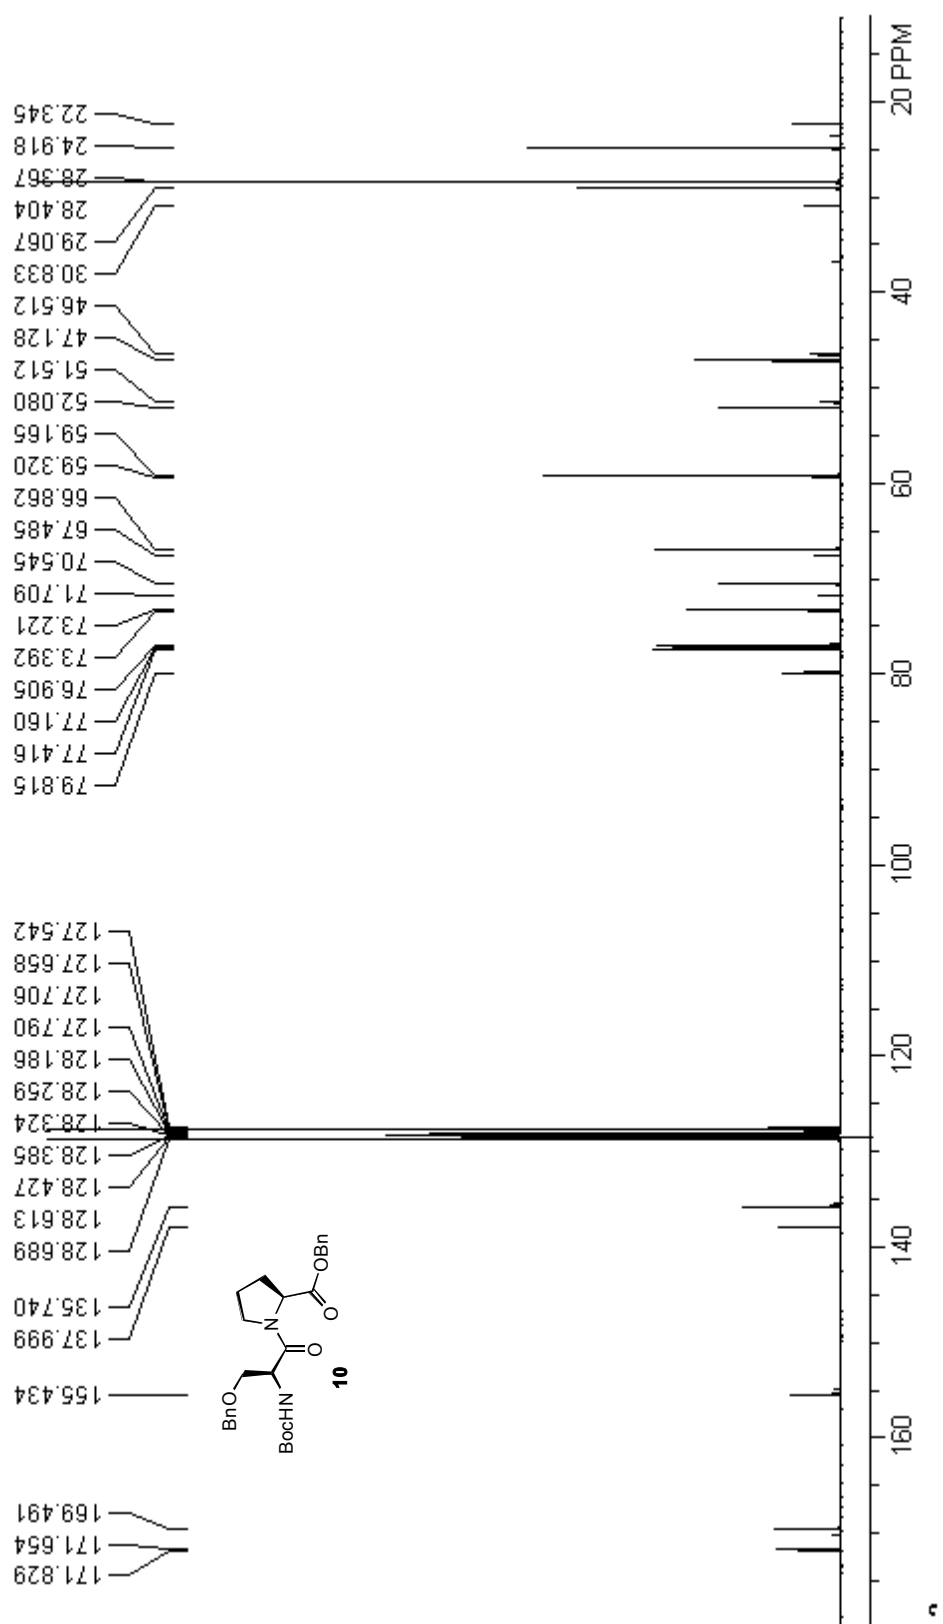

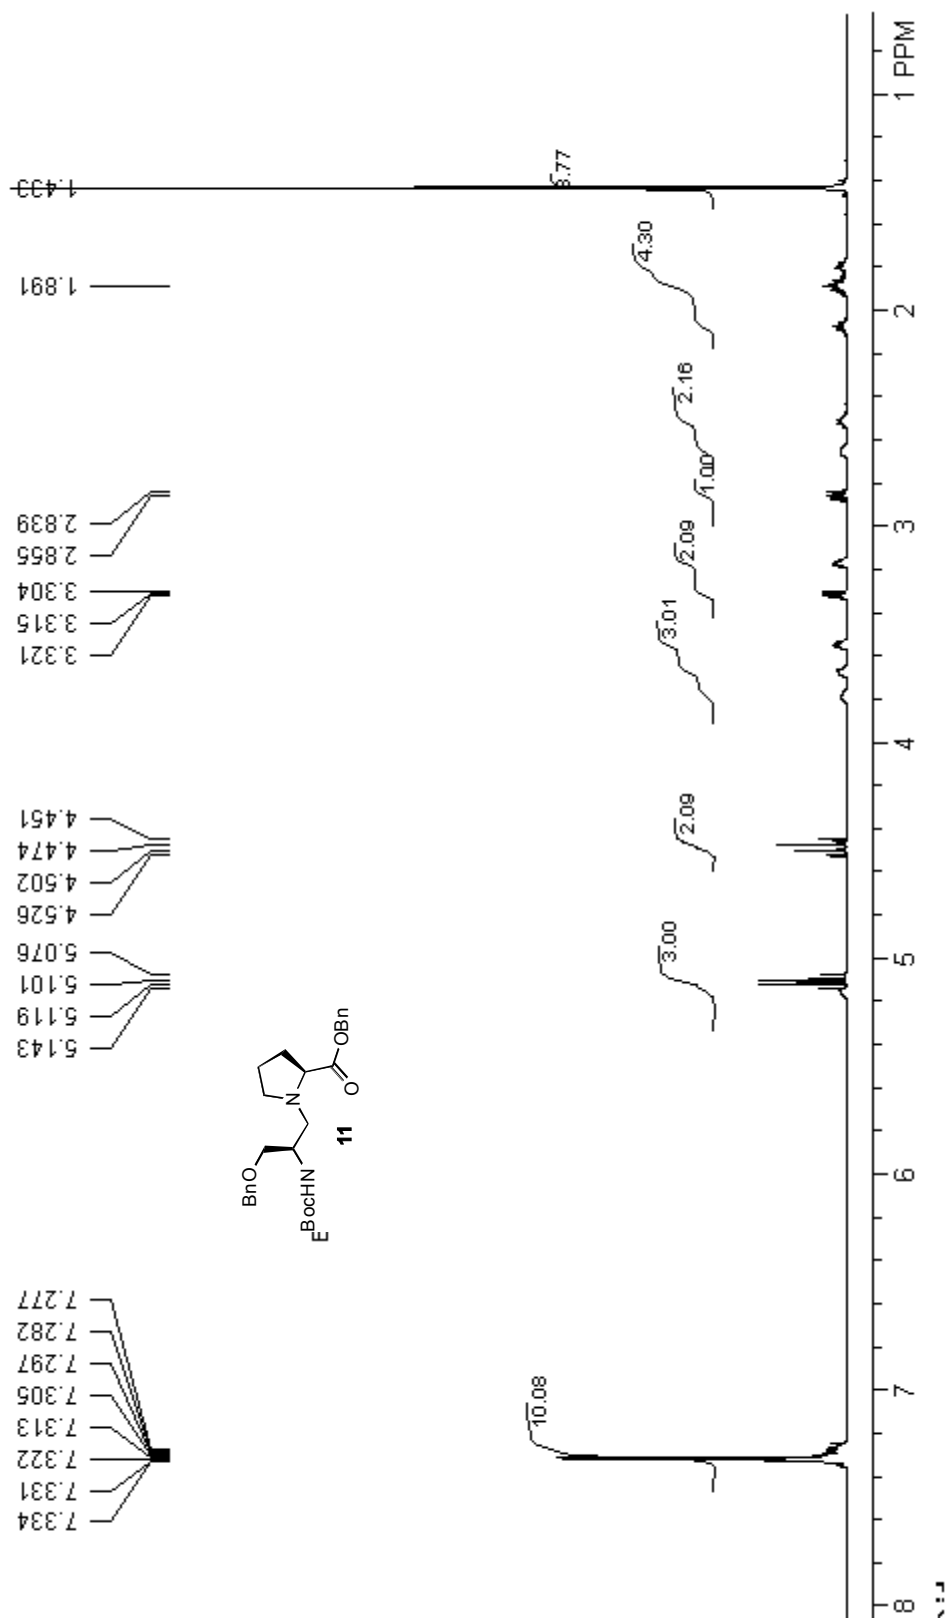

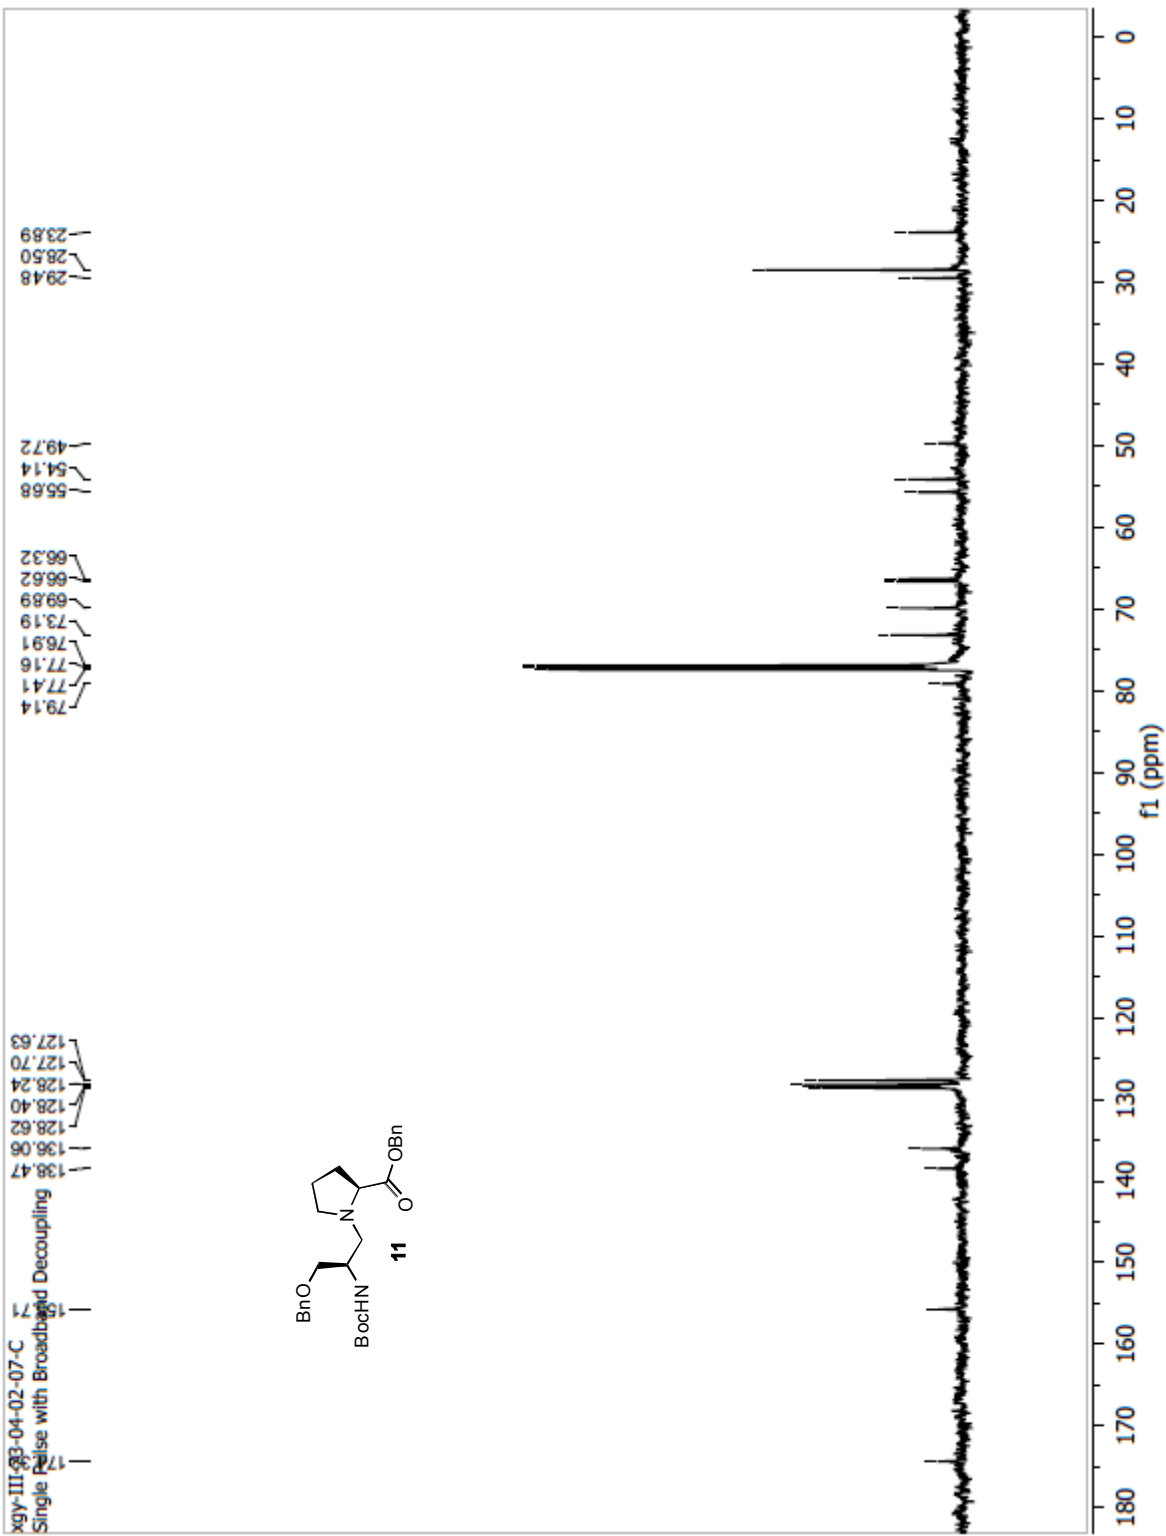

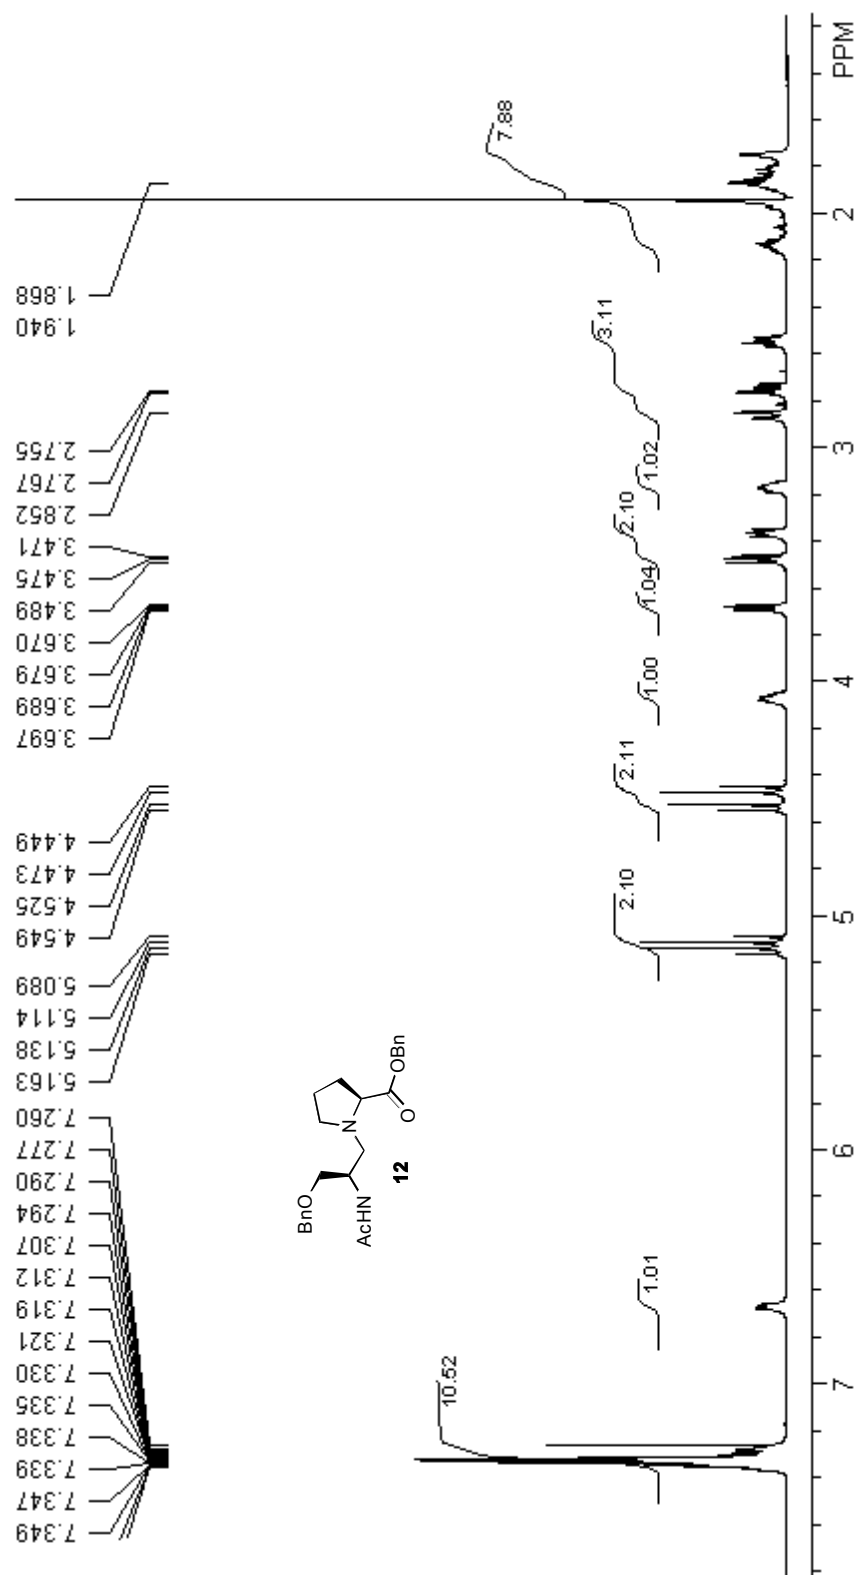

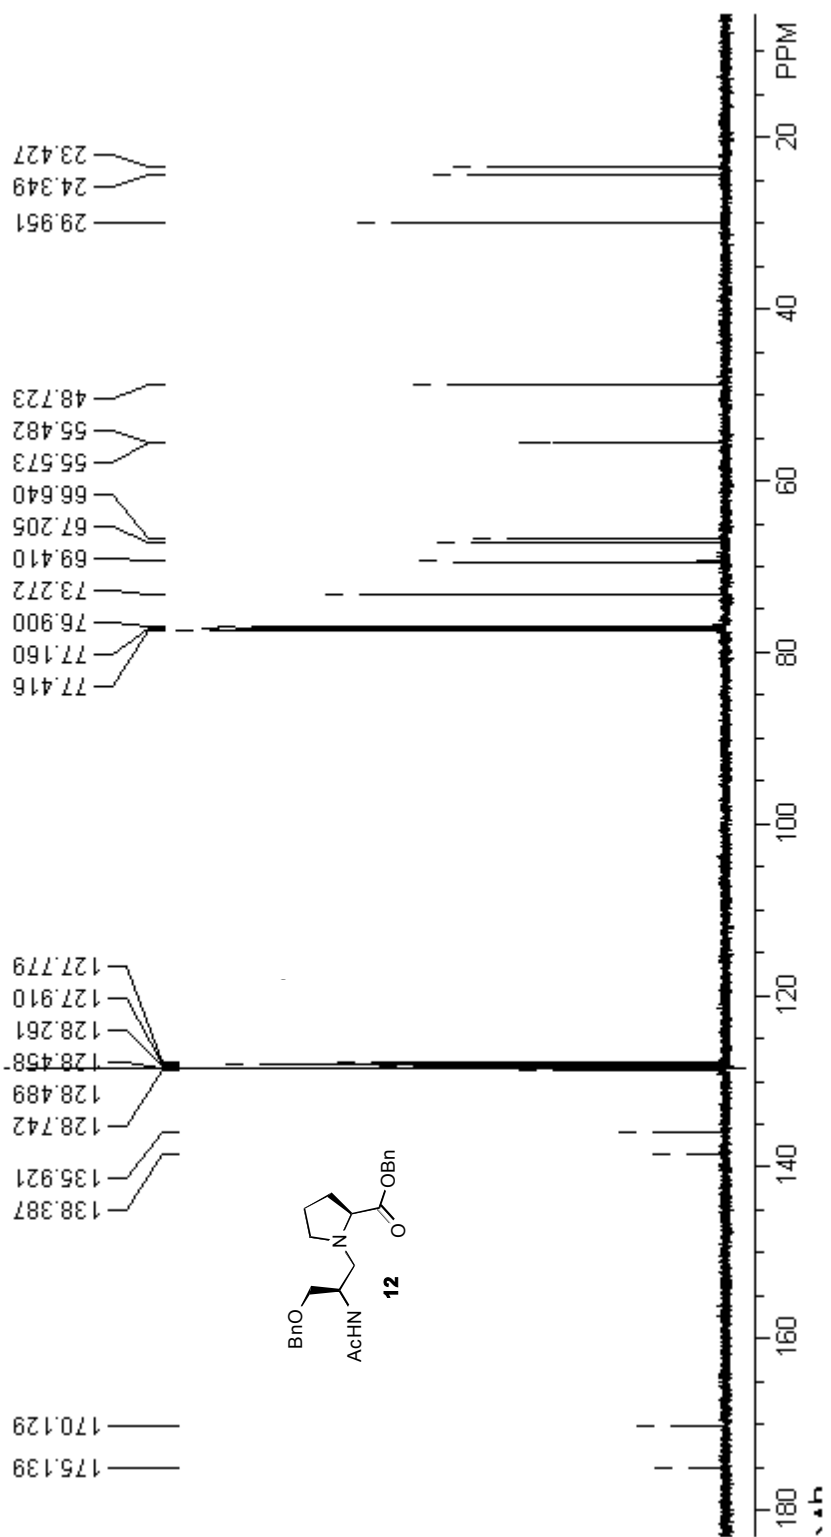



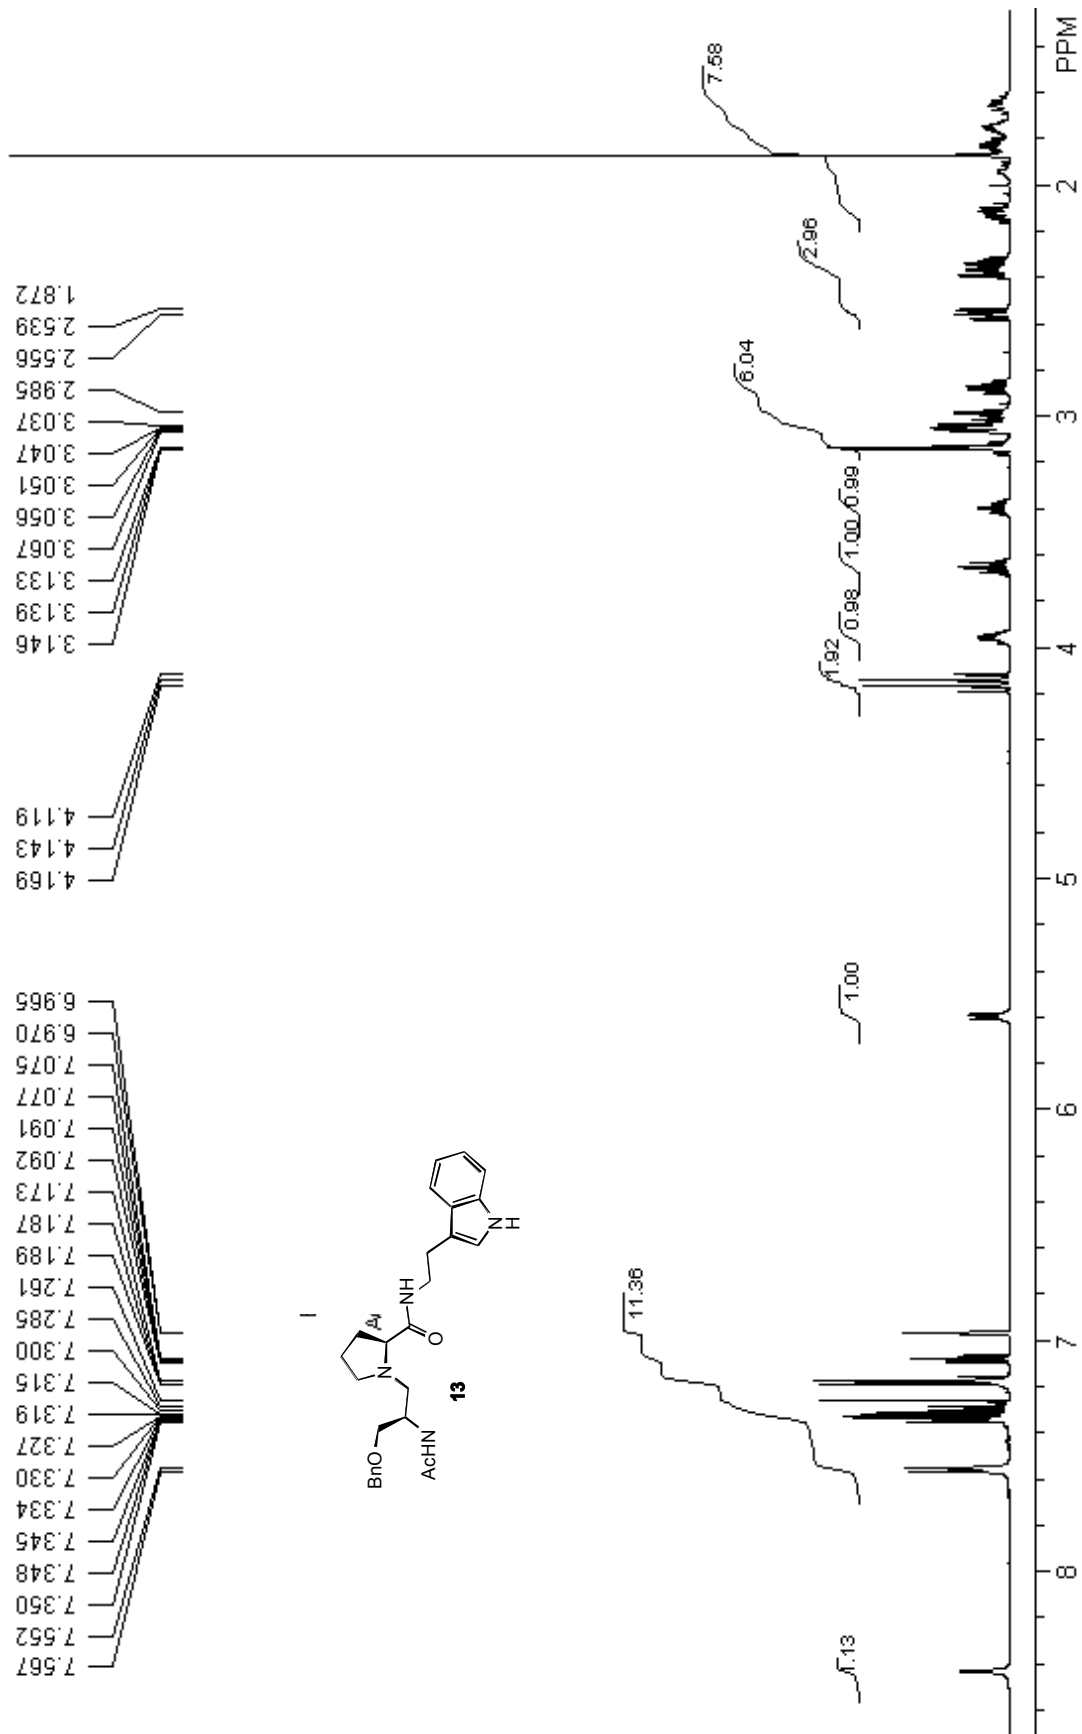

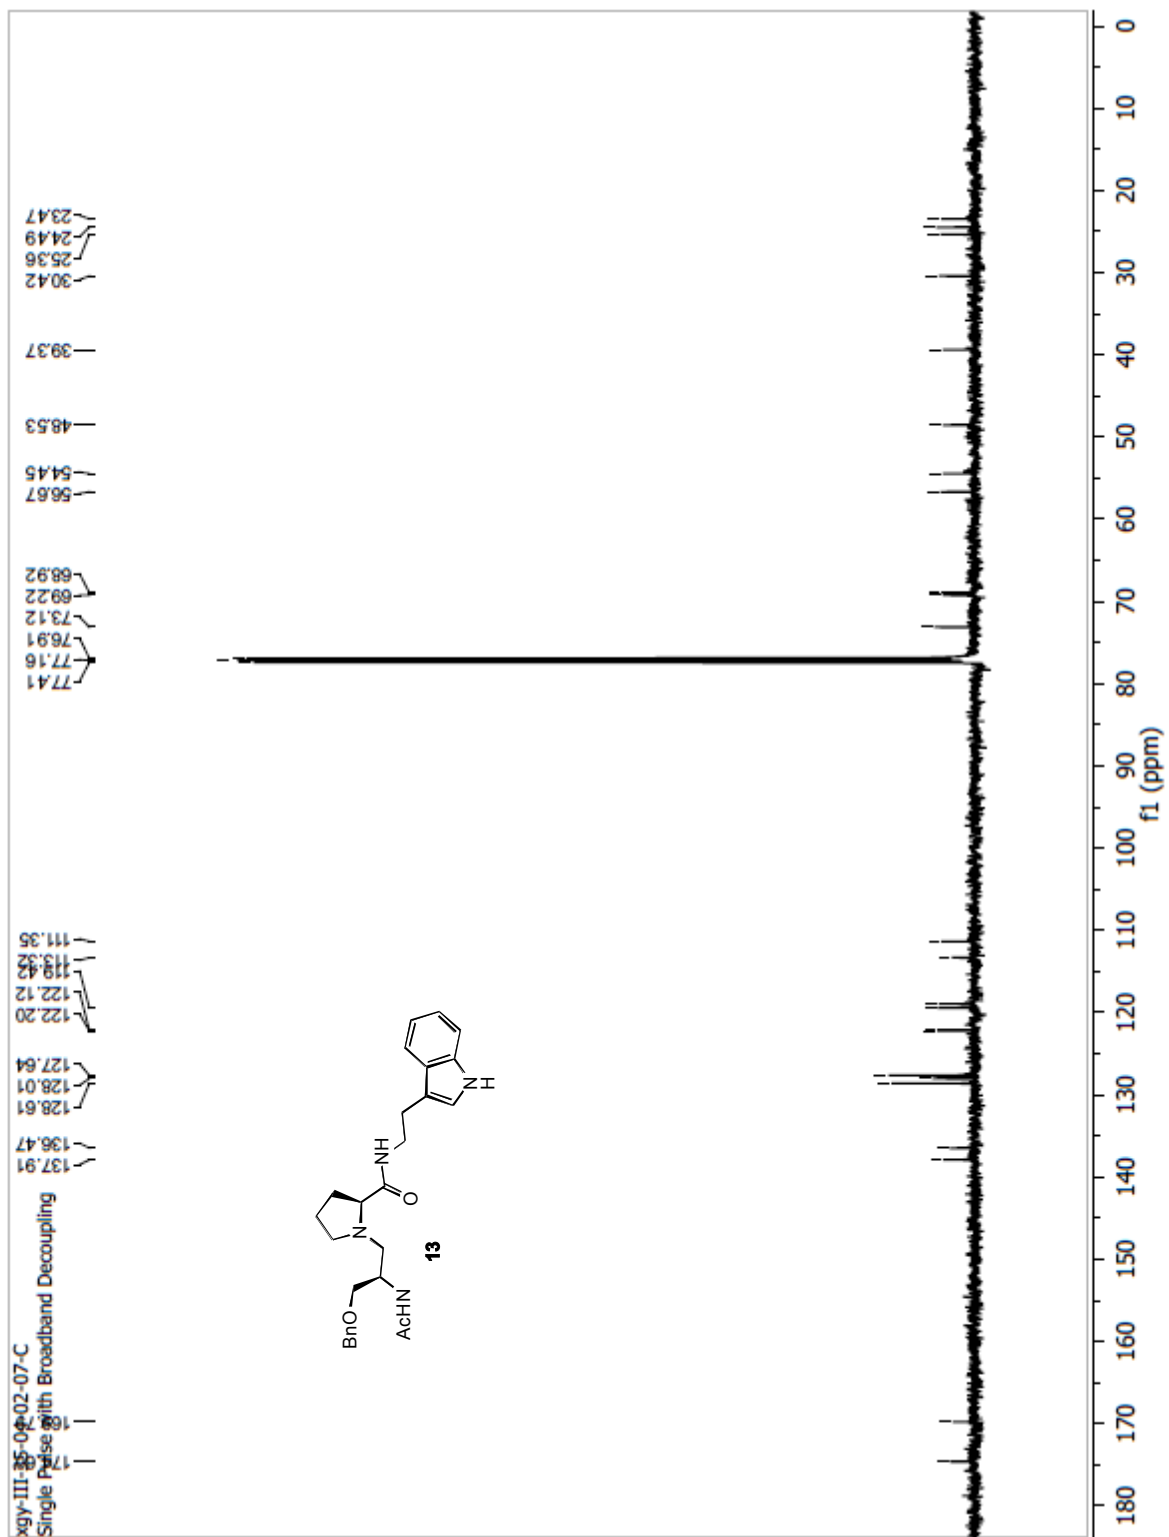

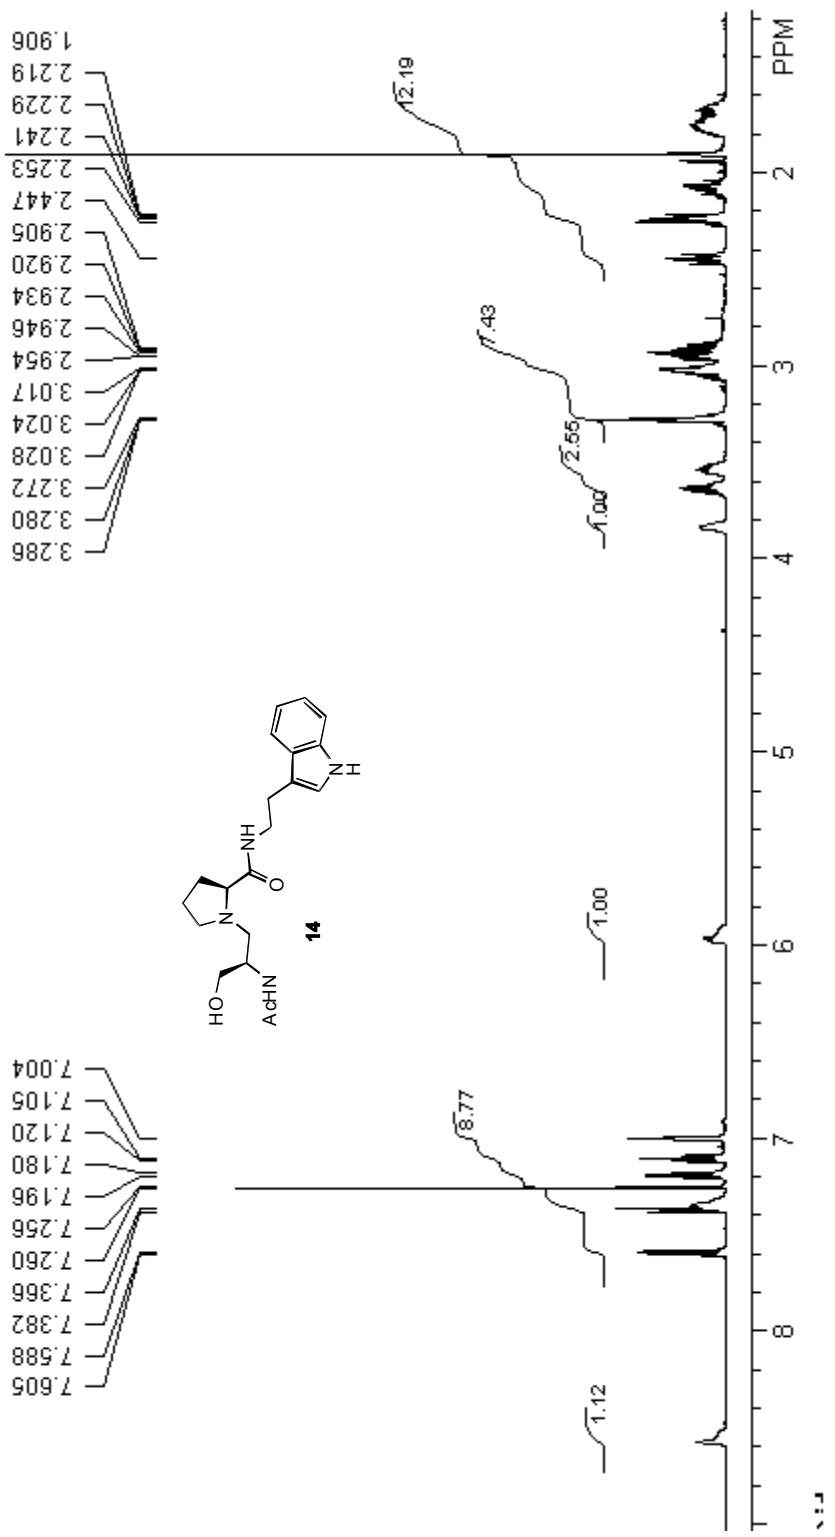

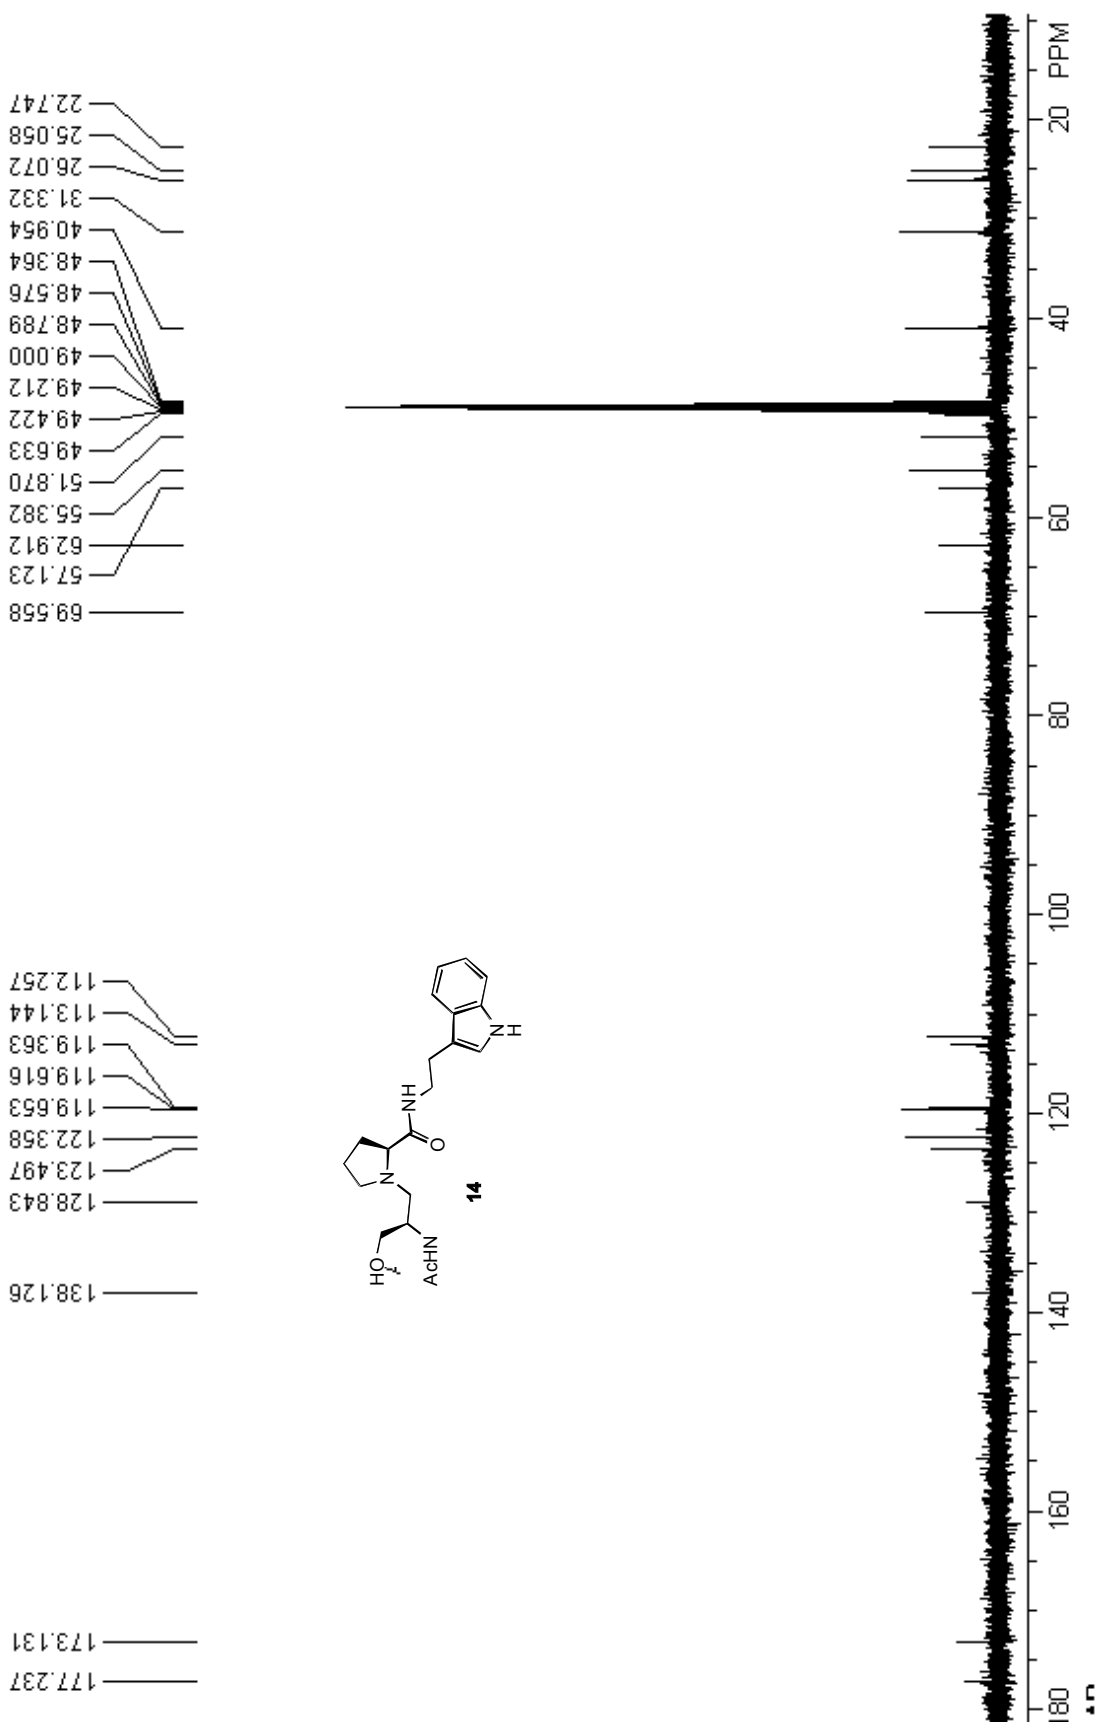

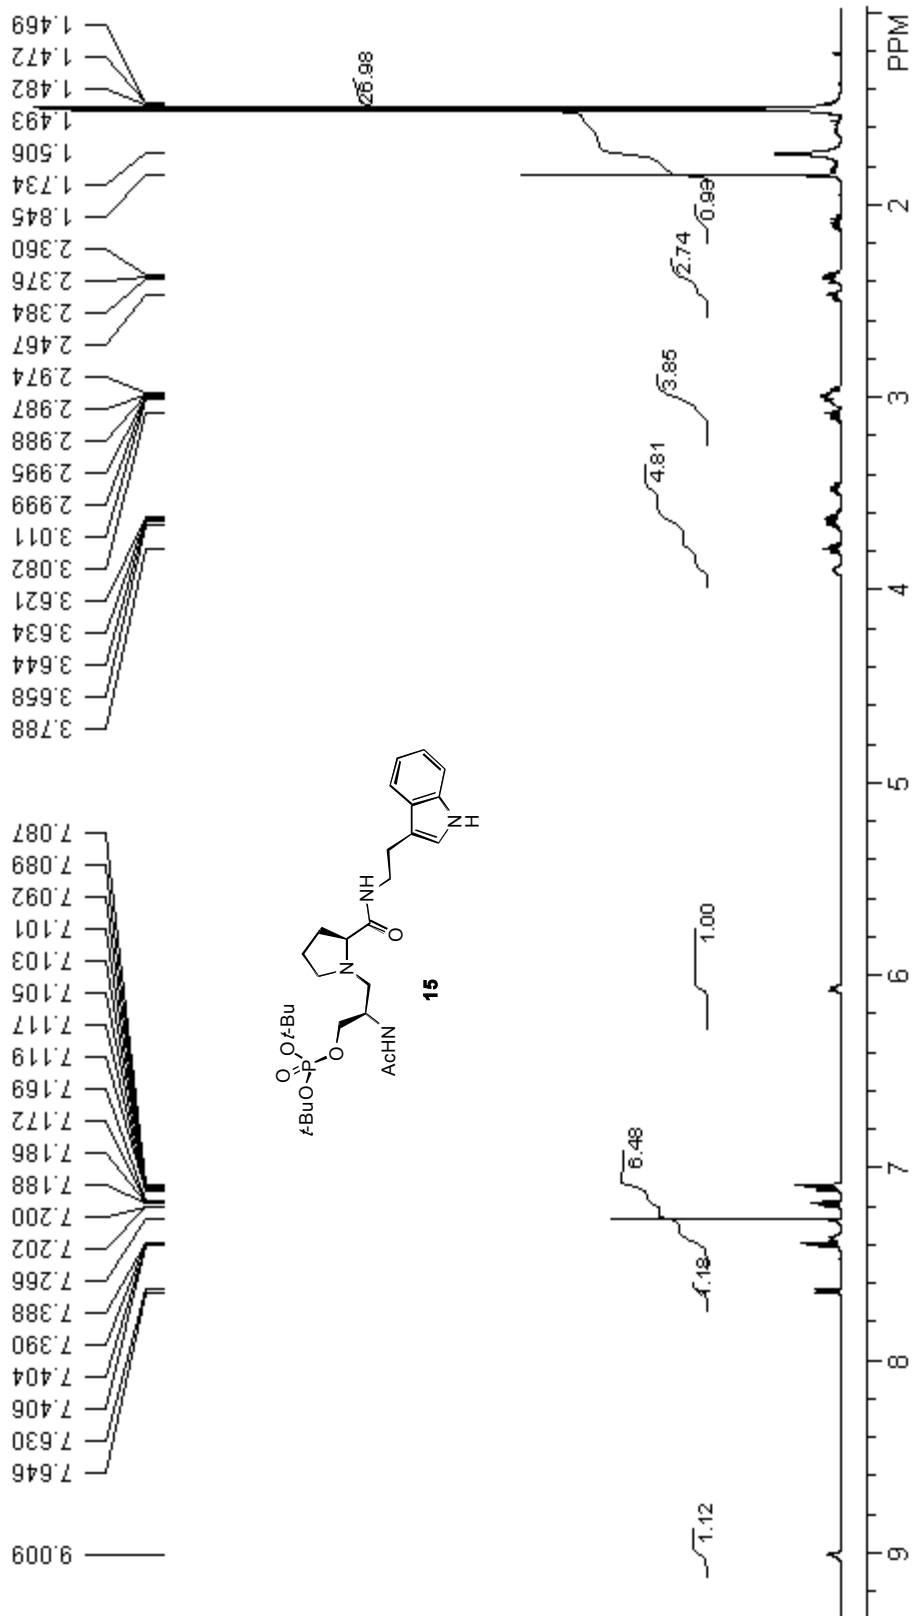

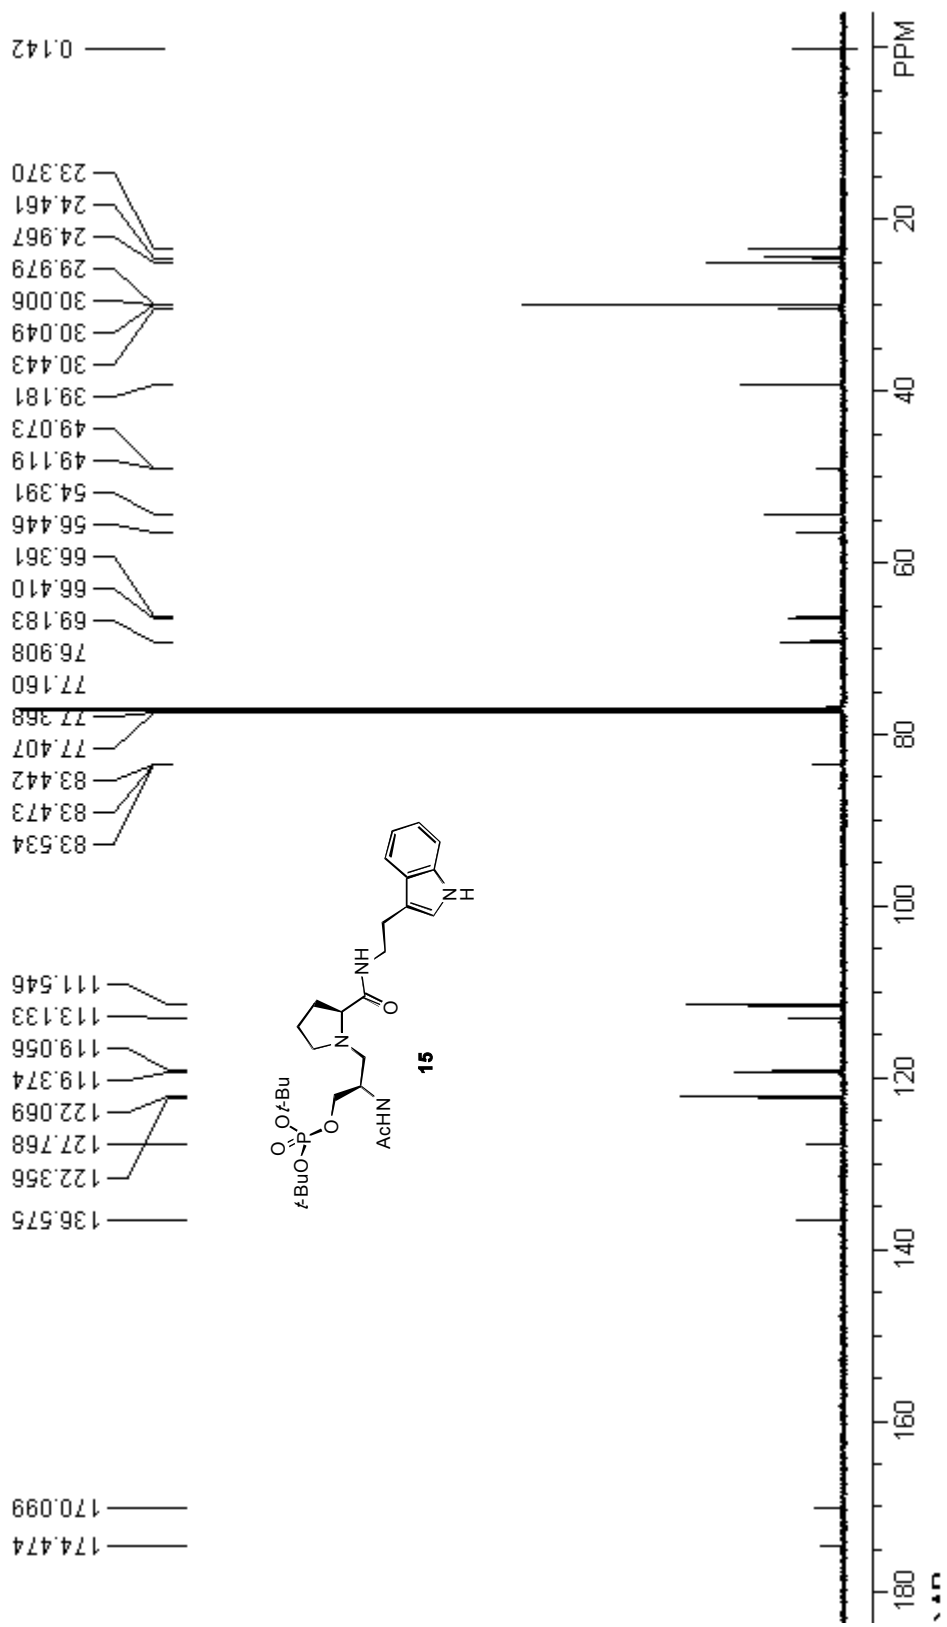

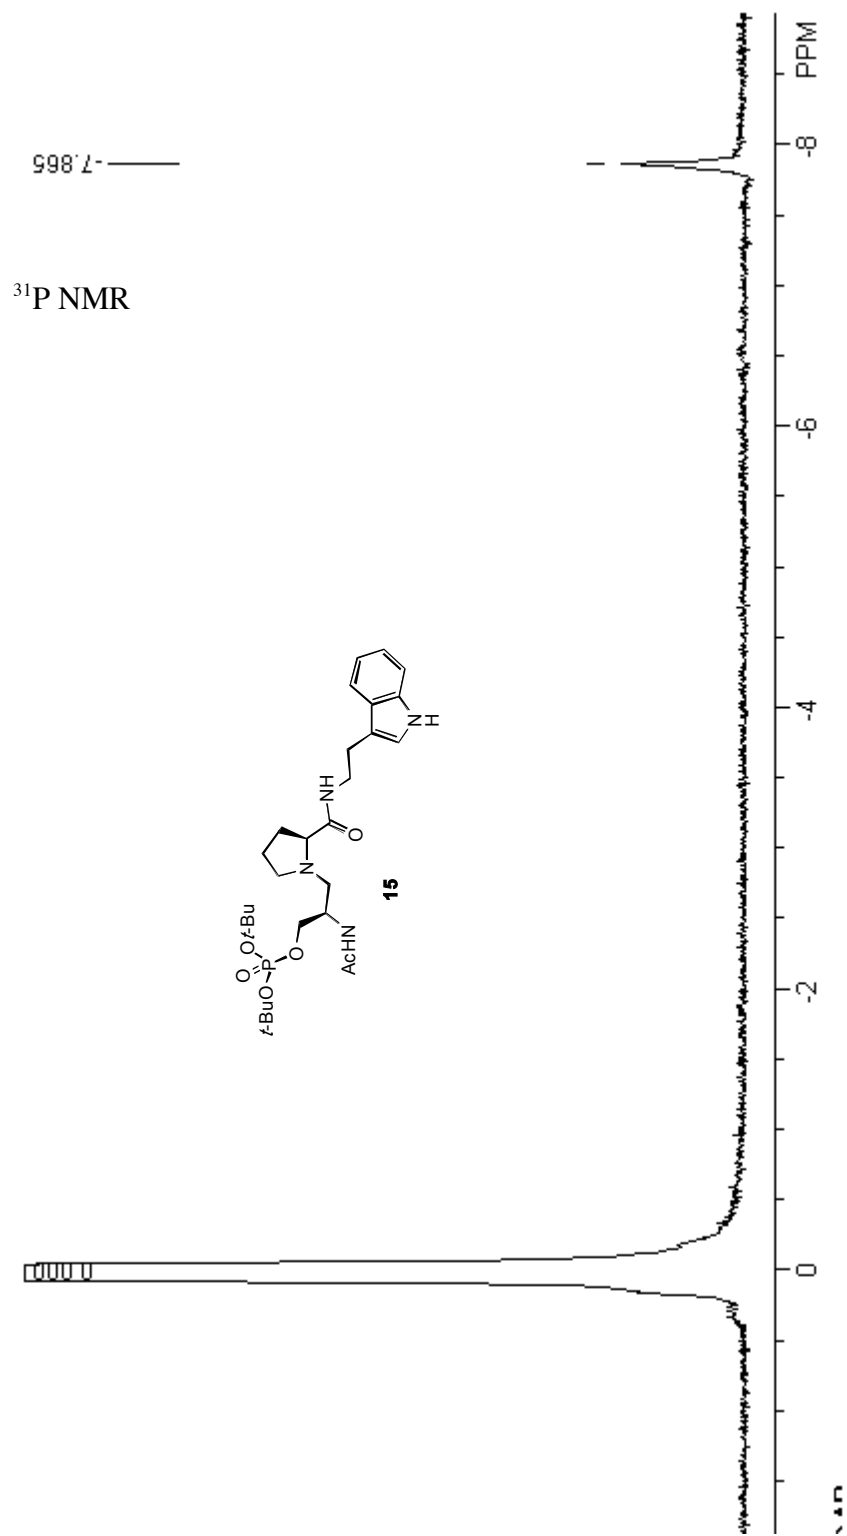

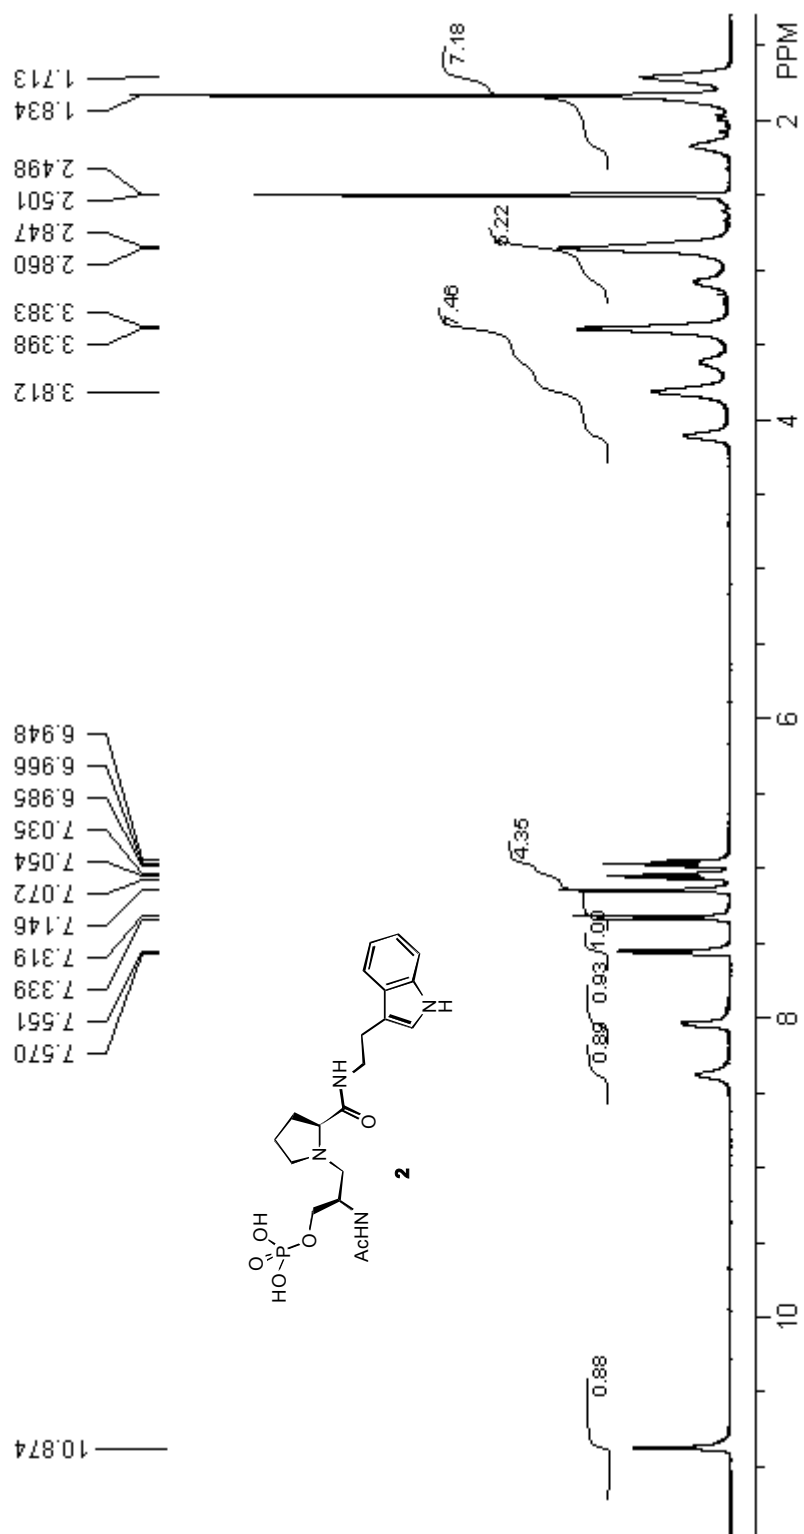



xy-III-53-C13-08-22-08-7.jdf

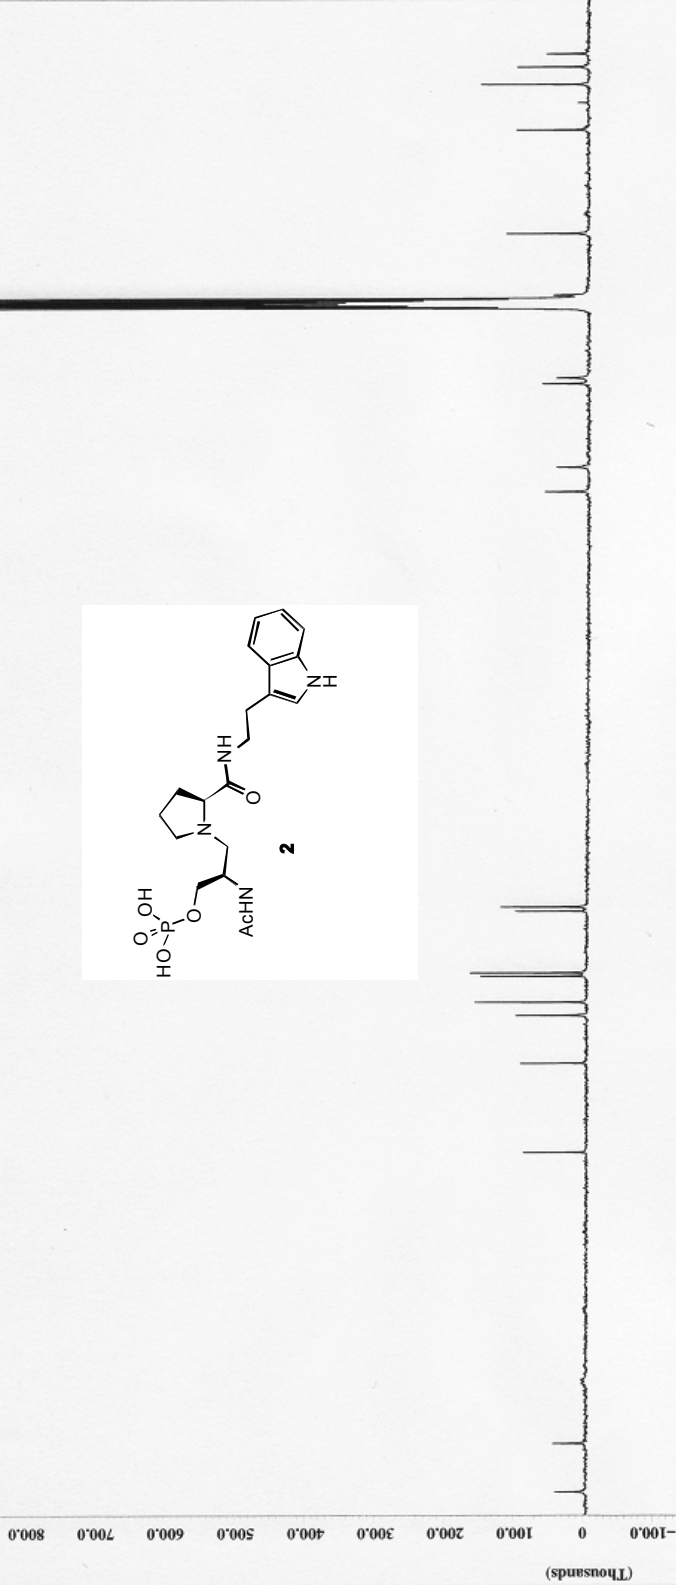

| Chemical Shift (ppm) | Assignment |
|----------------------|------------|
| 173.7600             |            |
| 168.6780             |            |
| 138.1553             |            |
| 128.8154             |            |
| 123.7791             |            |
| 122.3827             |            |
| 119.6509             |            |
| 112.3713             |            |
| 112.8139             |            |
| 110.0                |            |
| 100.0                |            |
| 90.0                 |            |
| 80.0                 |            |
| 70.0                 |            |
| 68.7925              |            |
| 66.2286              |            |
| 60.0                 |            |
| 57.4533              |            |
| 56.8505              |            |
| 49.1741              |            |
| 48.9986              |            |
| 48.8307              |            |
| 41.7036              |            |
| 30.7918              |            |
| 25.9845              |            |
| 24.1531              |            |
| 22.7796              |            |

X : parts per Million : 13C

```

Filename = xy-III-53-C13-08-22-
Author = etzkorn
Experiment = single_pulse_dec
Sample_id = xy-III-53-C13-08-22-
Solvent = METHANOL-D3
Creation_time = 21-AUG-2008 09:21:07
Revision_time = 18-SEP-2008 15:54:55
Current_time = 18-SEP-2008 15:56:58
Content = Single Pulse with Bro
Data format = 2D CPMPLX
Date_issued = 32788
Dim title = 13c
Dim units = [ppm]
Dimensions = X
Site = Delta NMR
Spectrometer = DELTA NMR

Field strength = 11.7473579[T] (500 [MH
X_acq_duration = 1.0420224[s]
X_domain = 13c
X_freq = 125.76529768[MHz]
X_offset = 100[ppm]
X_points = 32768
X_prescans = 4
X_resolution = 0.9596727[Hz]
X_sweep = 31.44654088[MHz]
Irr_domain = 18
Irr_freq = 500.15891521[MHz]
Irr_offset = 500[ppm]
Irr_points = 1
Irr_prescans = 1
Mod return = 1
Scans = 21495
Total_scans = 21495
X_90_width = 11[us]

X_acq_time = 1.0420224[s]
X_angle = 45[deg]
X_pulse = 5.5[us]
Initial_wait = 1[s]
Phase_preset = 3[us]
Recvr_gain = 26
Relaxation_delay = 1[s]
Temp_get = 23.6[dc]
Unblank_time = 2[us]

```

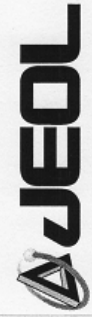

PHOSPHORUS OBSERVE  
STANDARD PARAMETERS  
PHOSPHATE REGION

Pulse Sequence: s2pu1

Solvent: DMSO  
Ambient temperature  
File: xgy-III-53-P-H3p04-DMSO  
INOVIA-400 "inova400a1t"

Relax. delay 1.000 sec  
Pulse 70.0 degrees  
Acq. time 2.000 sec  
Width 28996.3 Hz  
1000 repetitions

OBSERVE P31, 161.9011158 MHZ  
DECOUPLE H1, 399.9480181 MHZ

Power 41 dB  
continuously on

WALTZ-16 modulated

DATA PROCESSING

Line broadening 1.0 Hz  
FT size 131072  
Total time 50 min, 8 sec  
Mar 20 2007

VA Tech Chemistry NMR Lab

### <sup>31</sup>P NMR

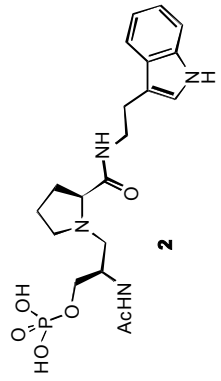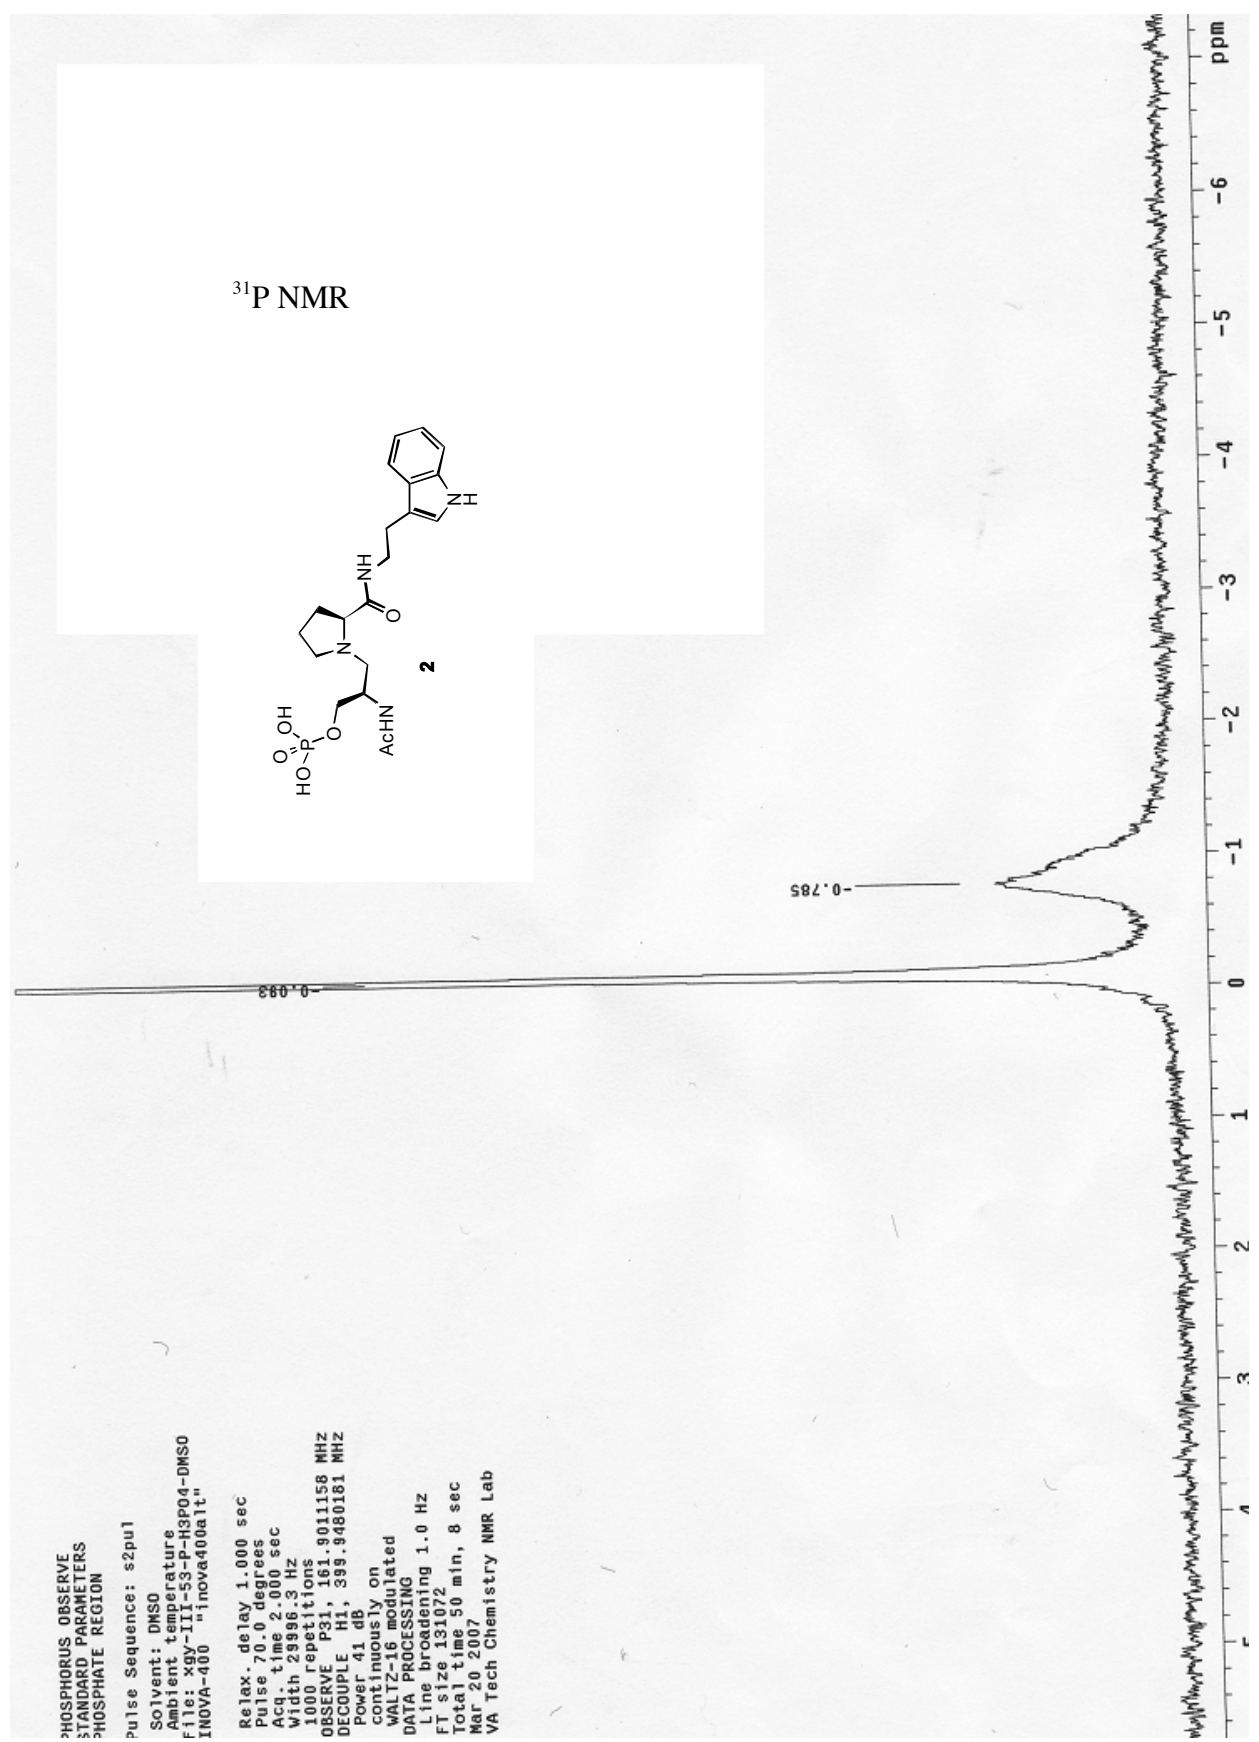

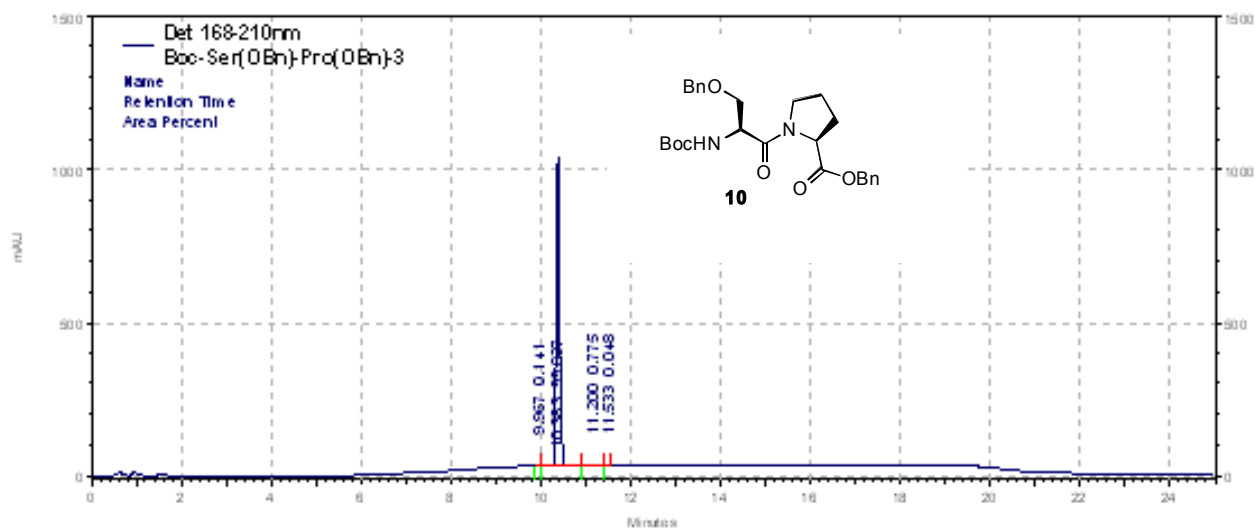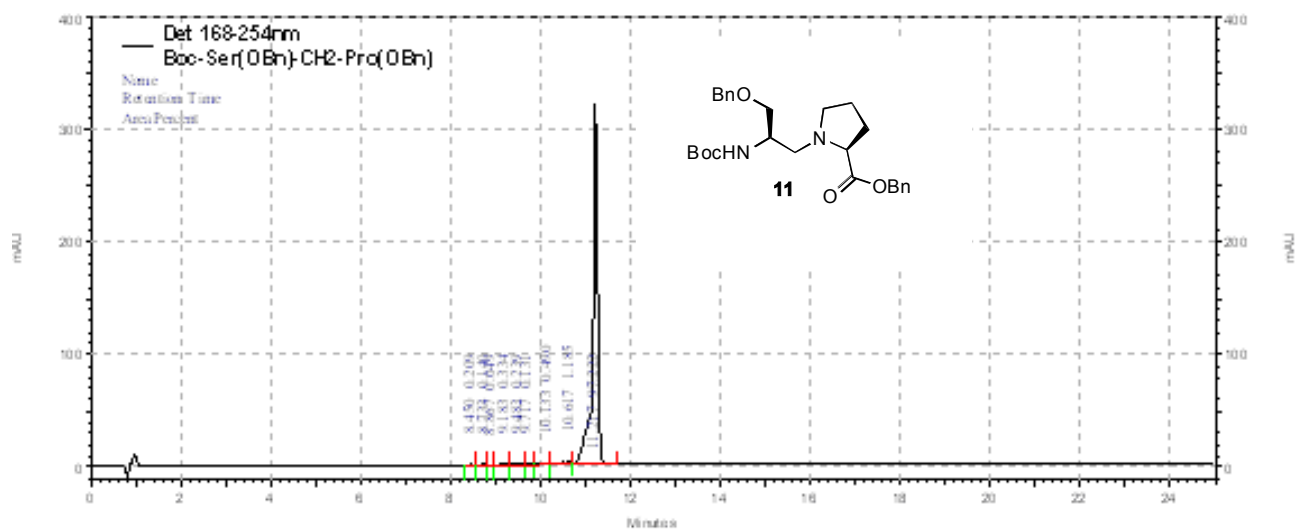

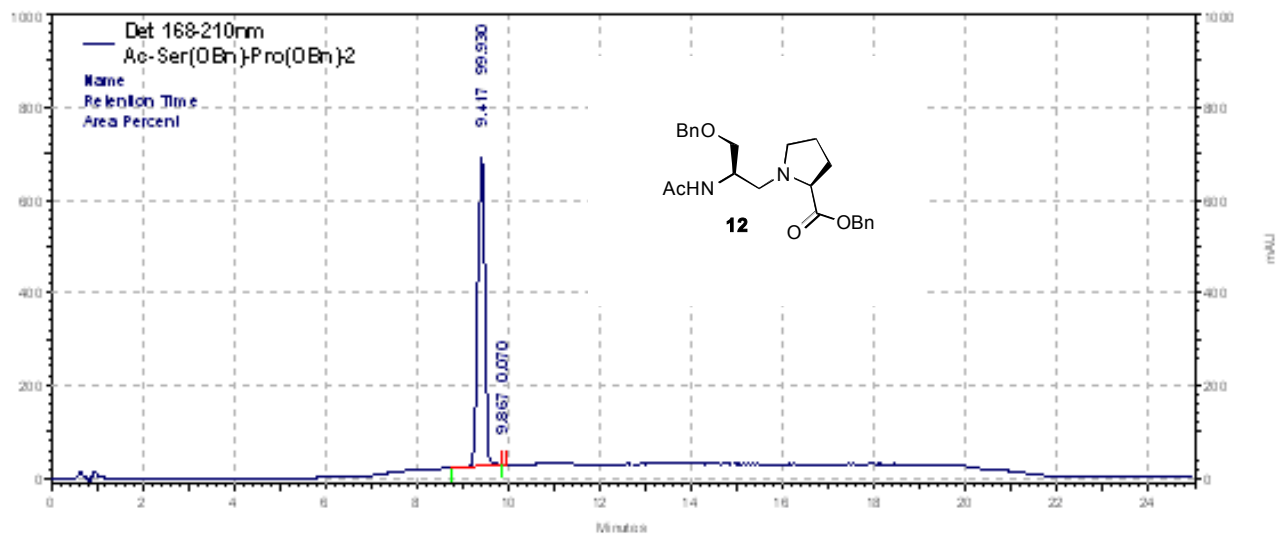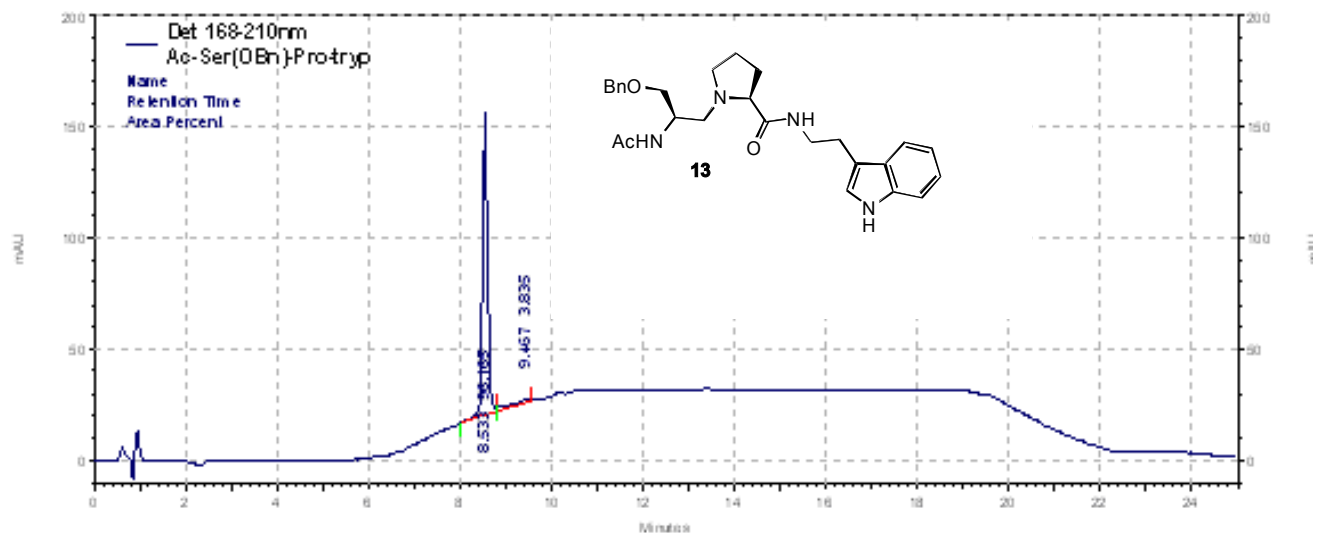

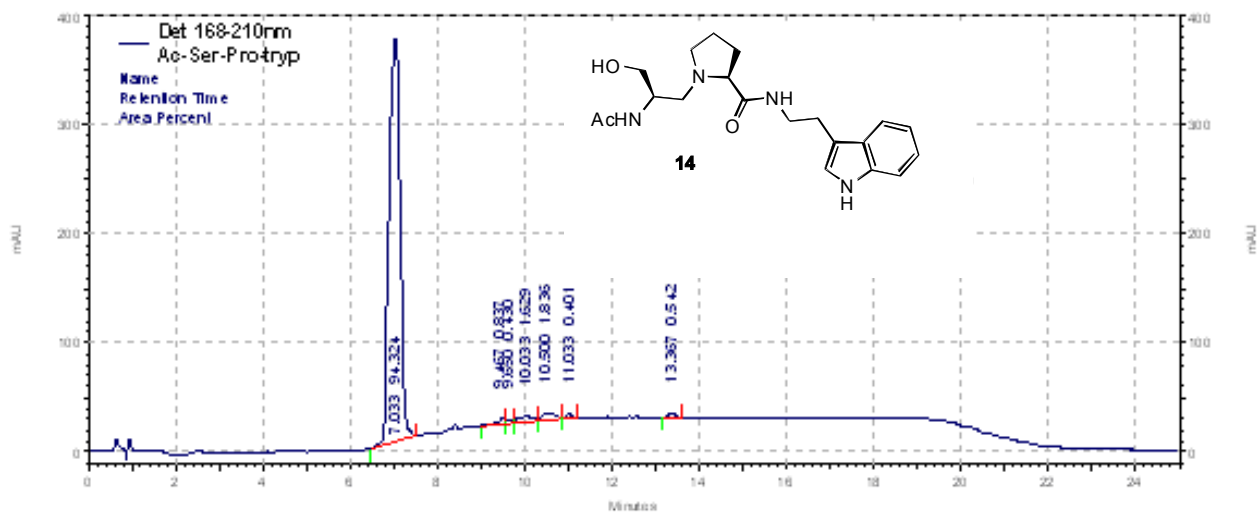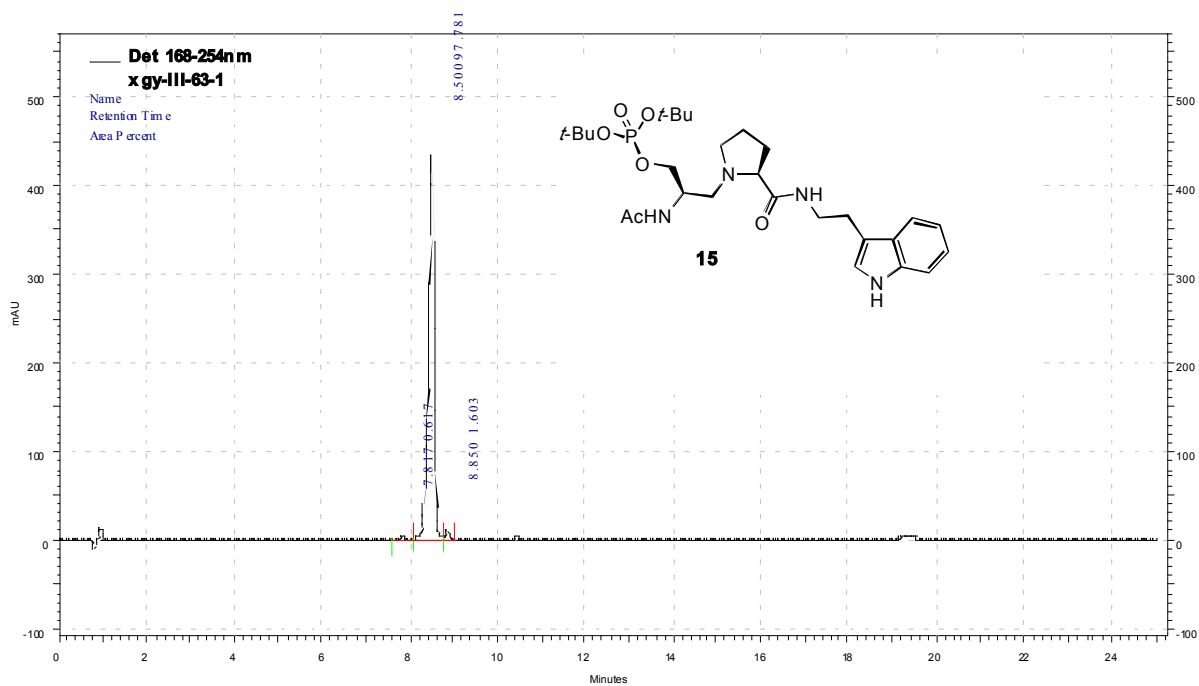

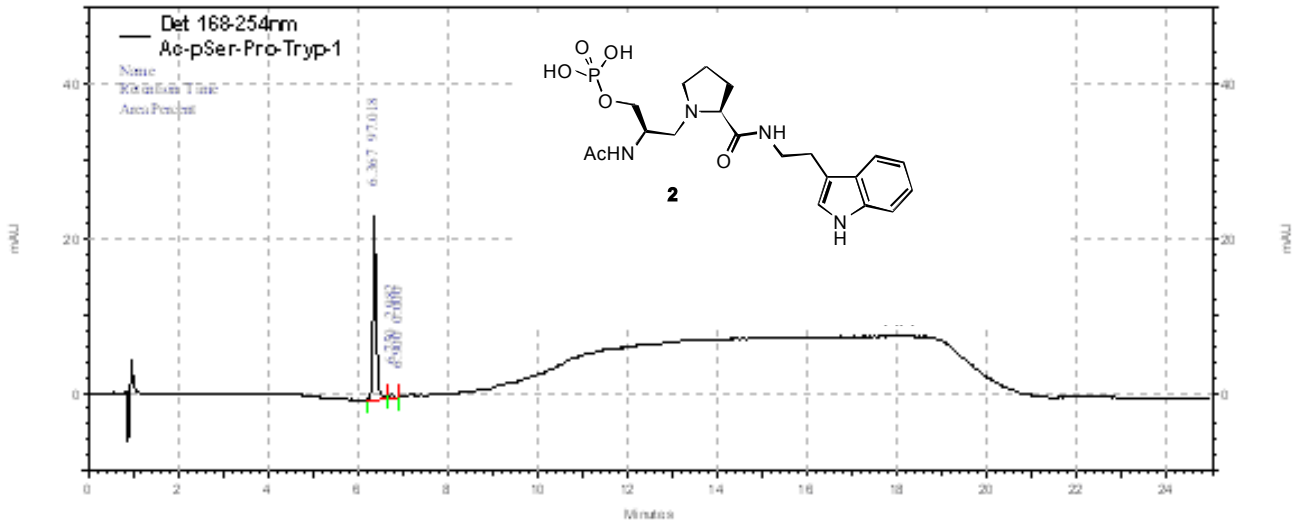

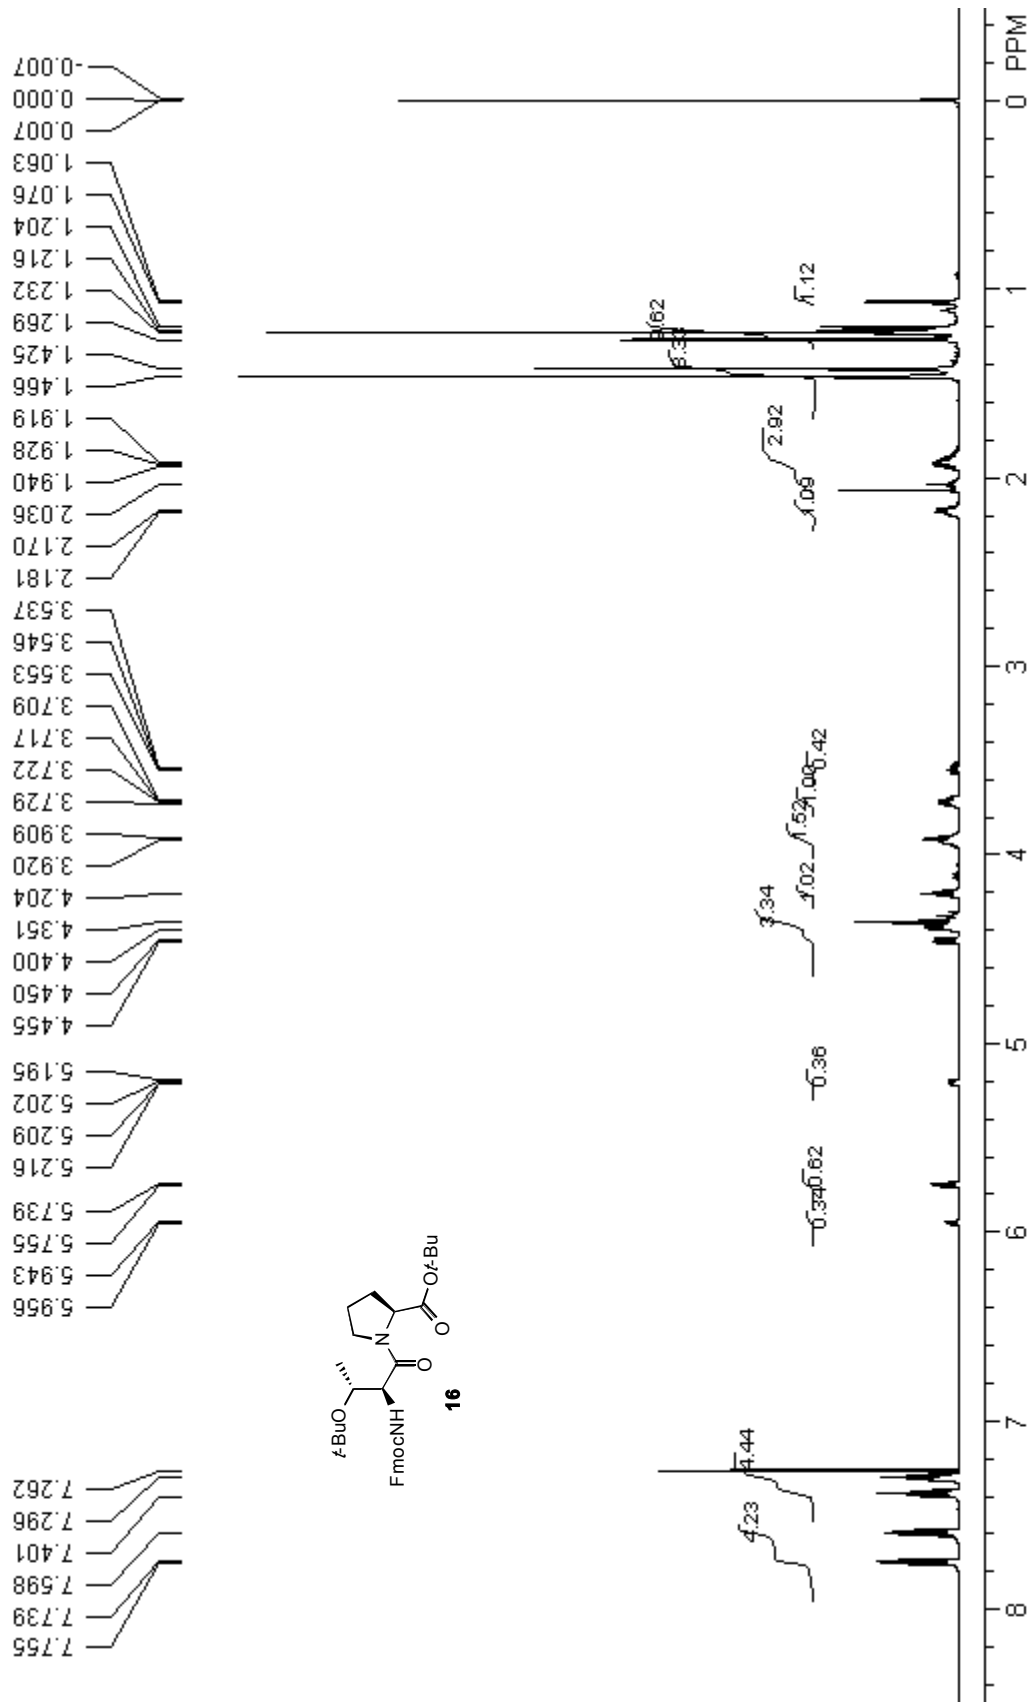





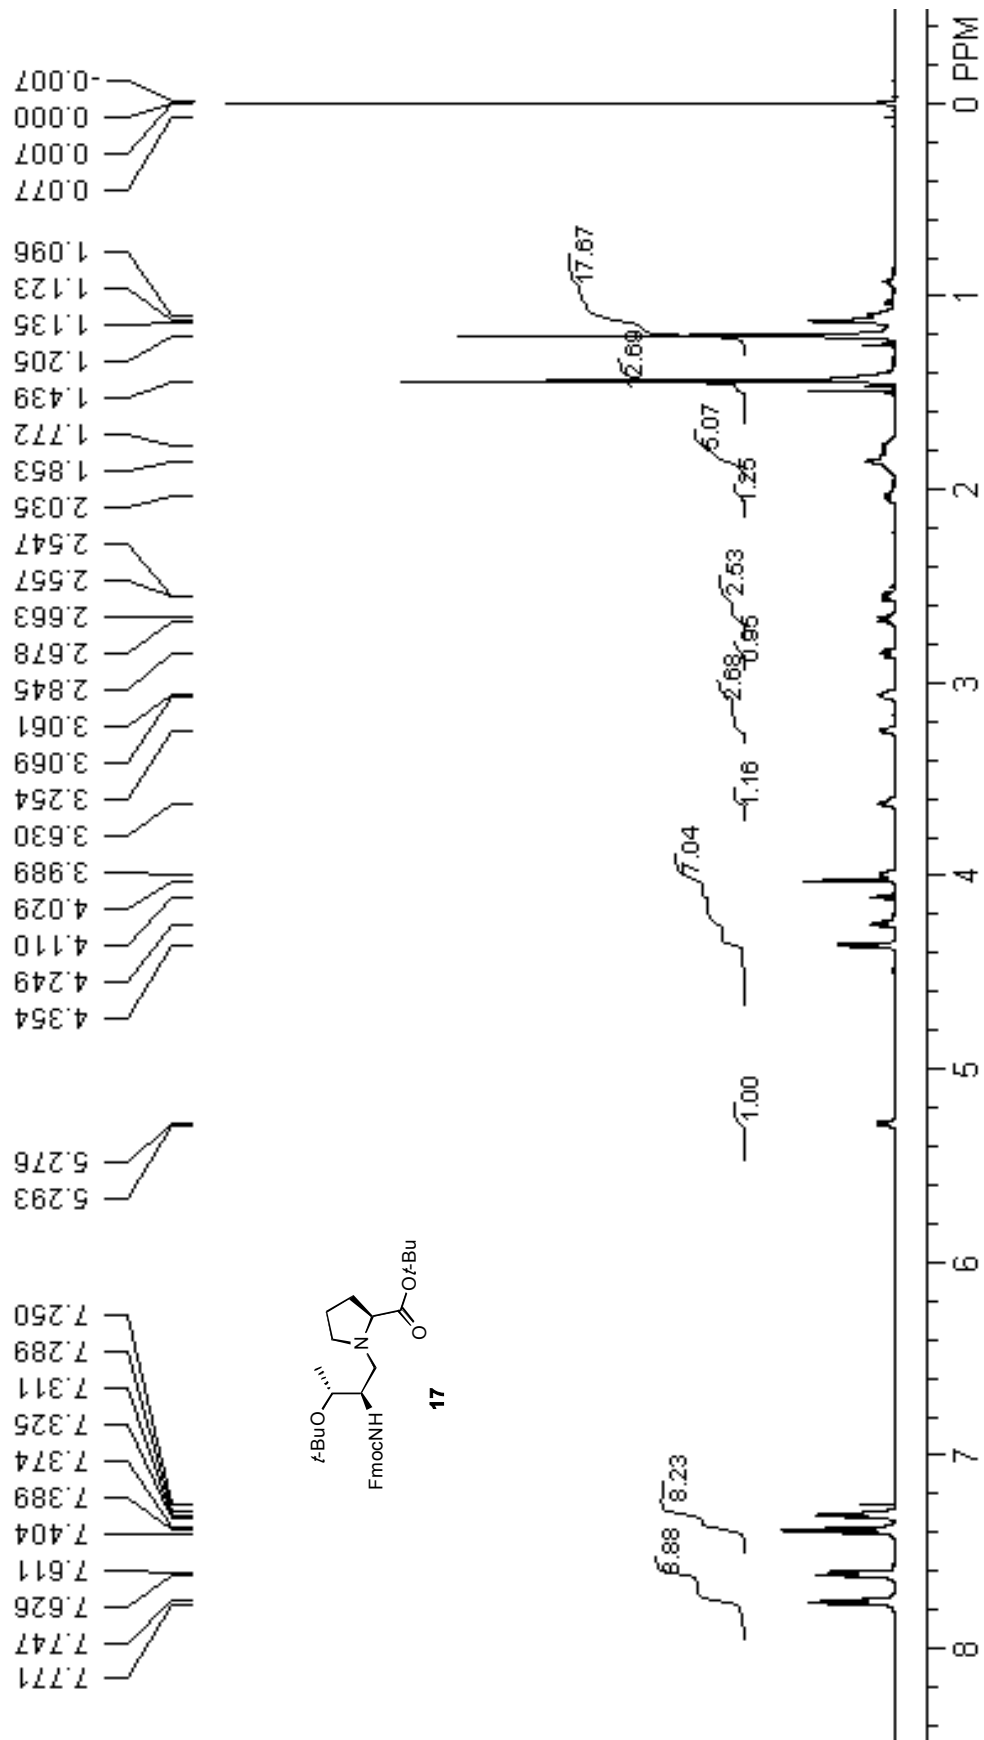

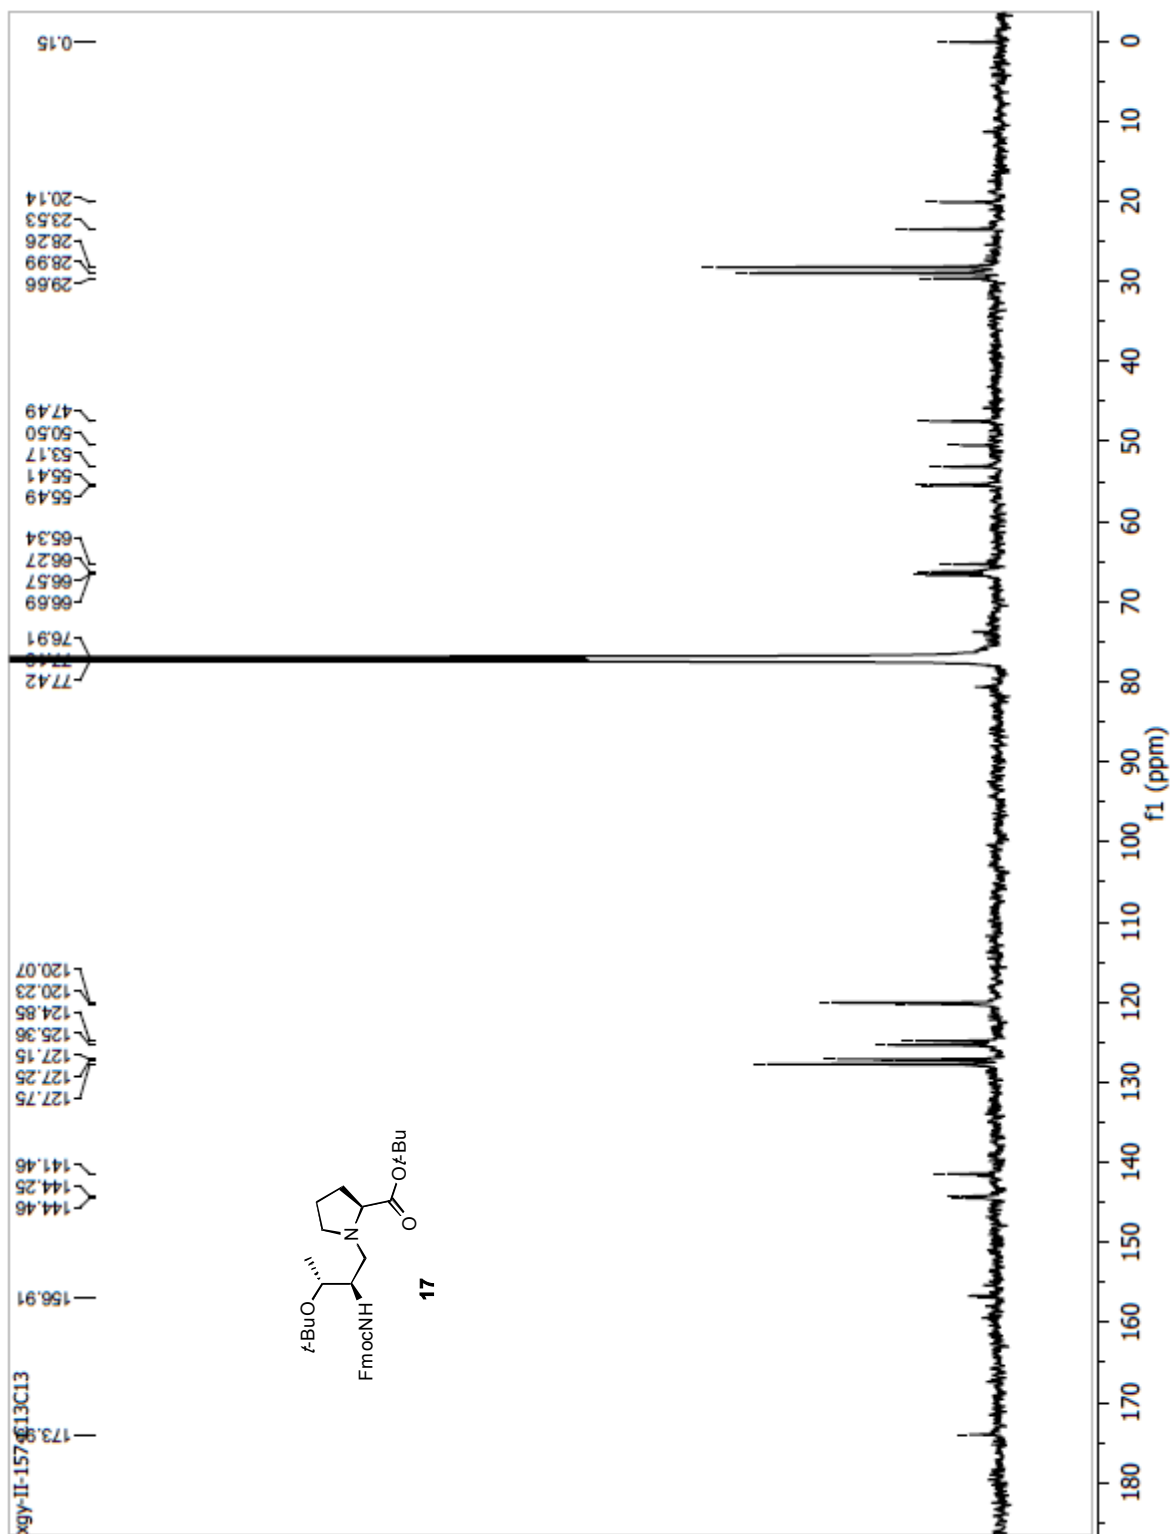

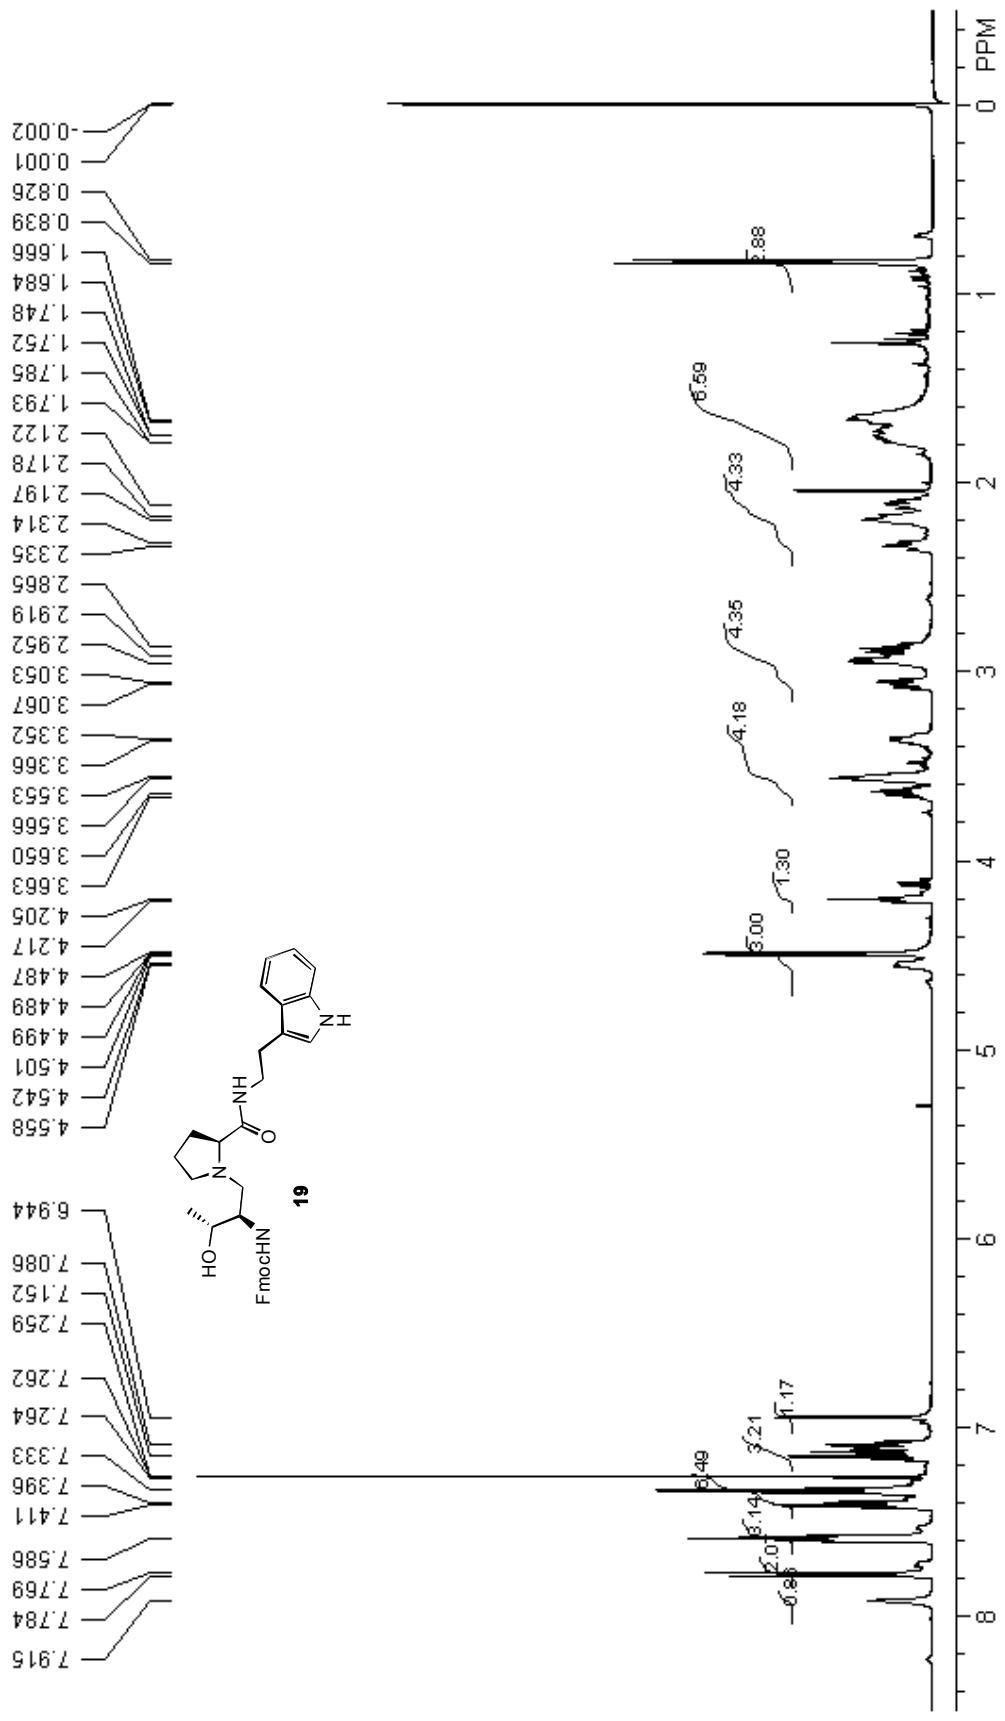

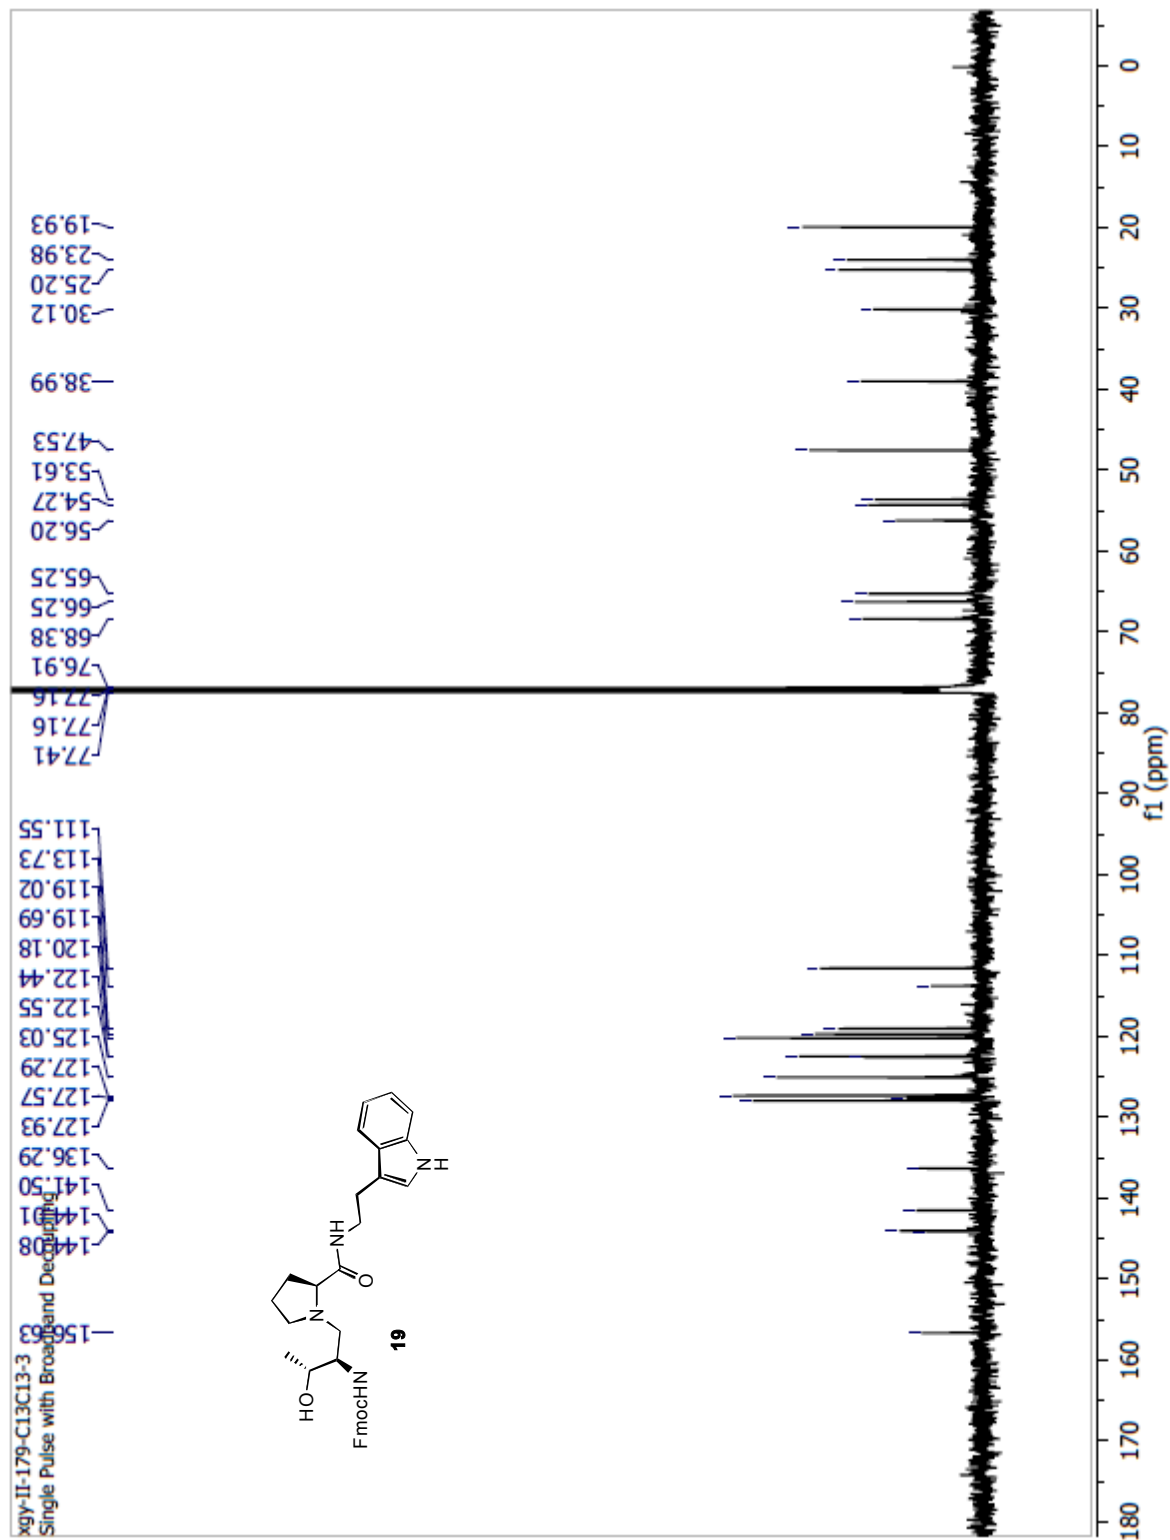

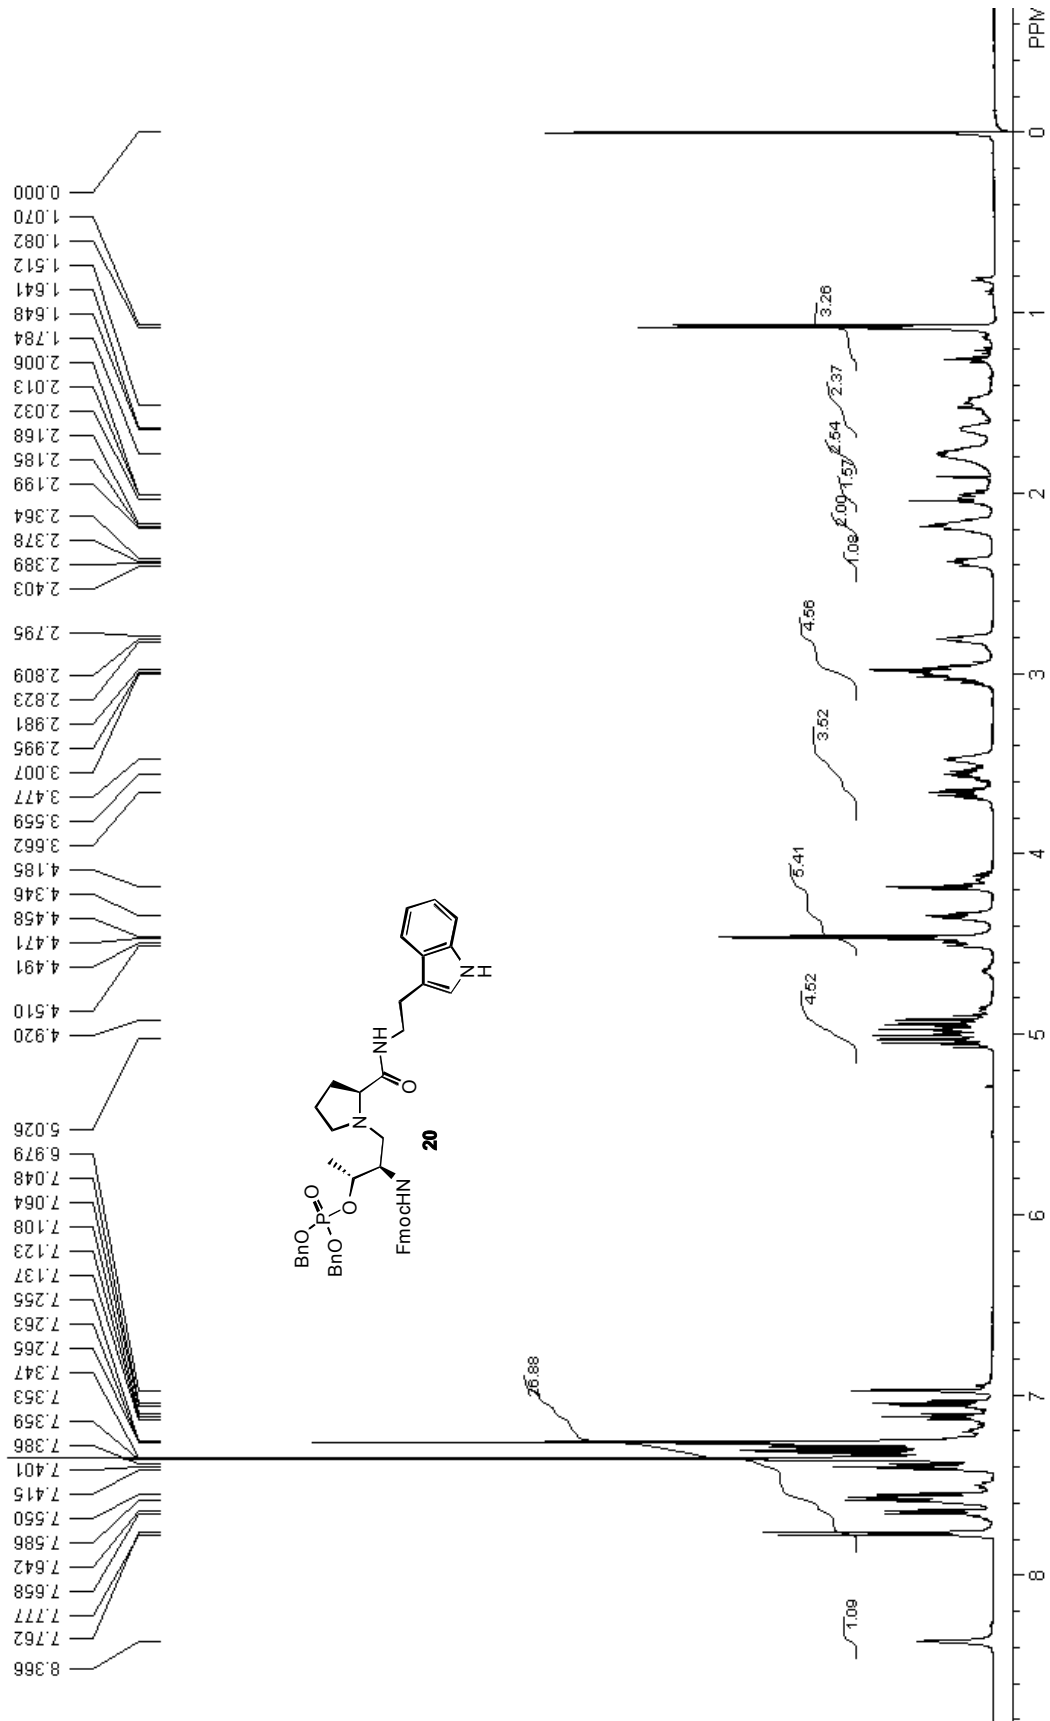

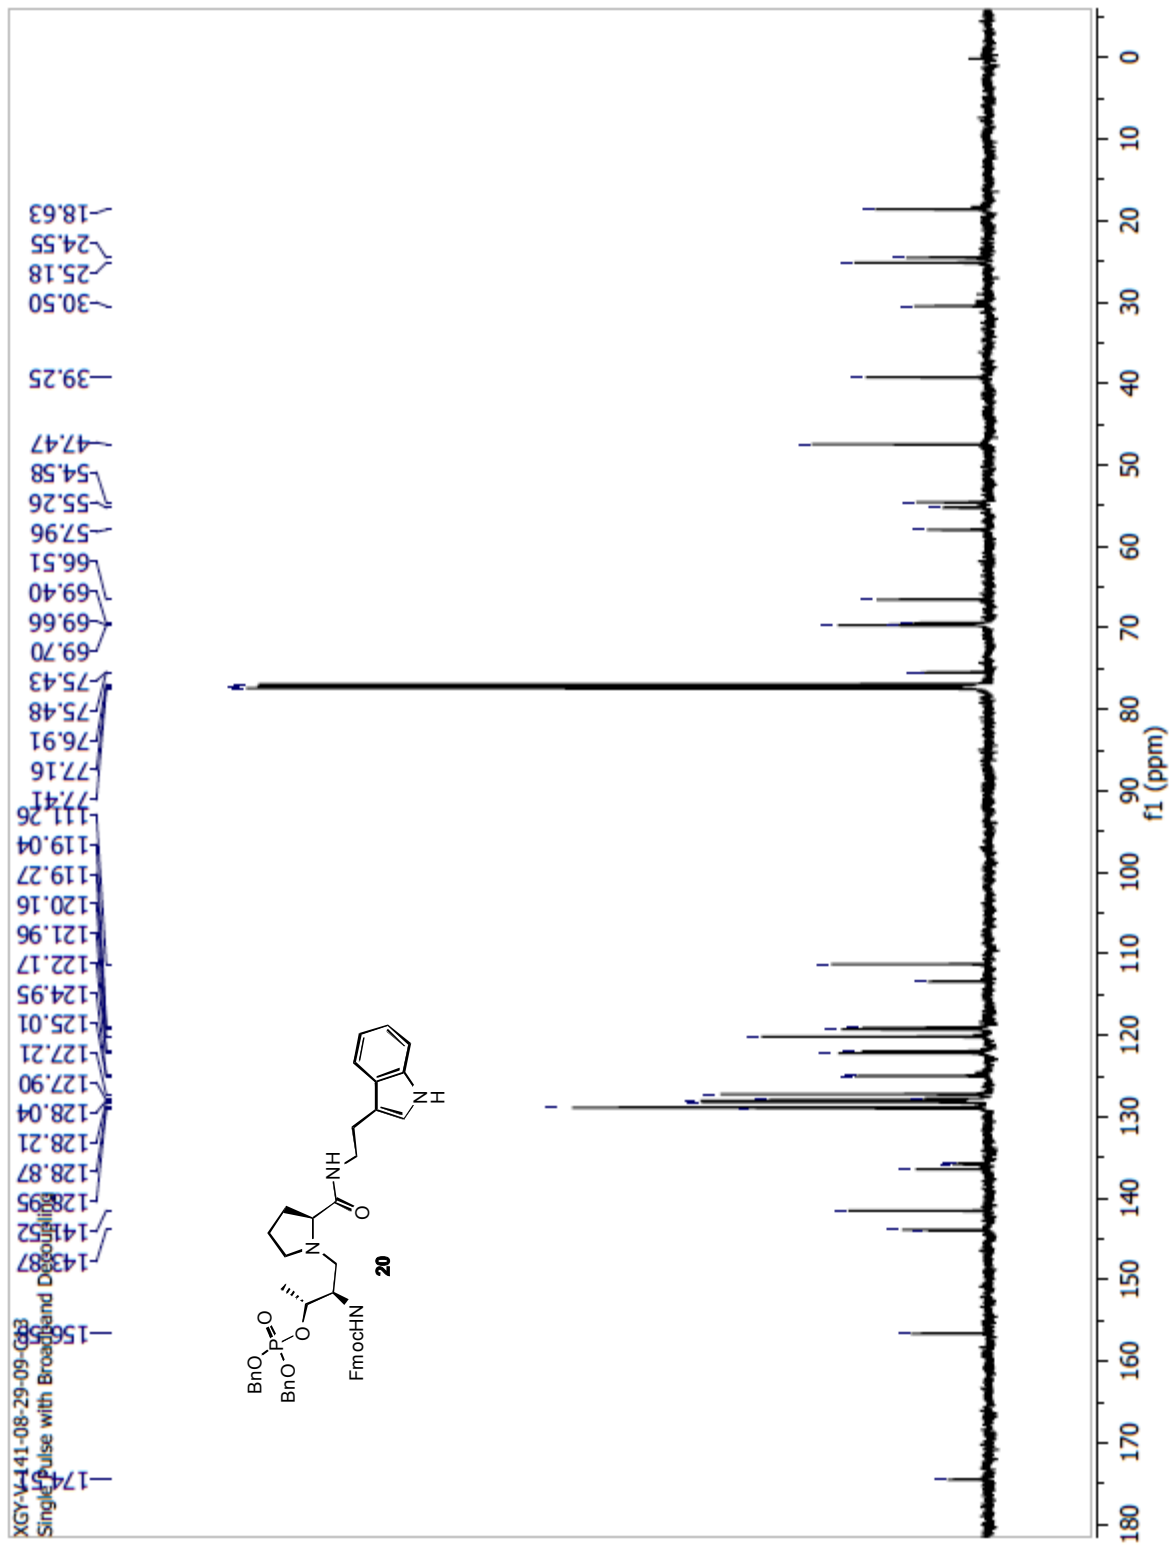

$^{31}\text{P}$  NMR

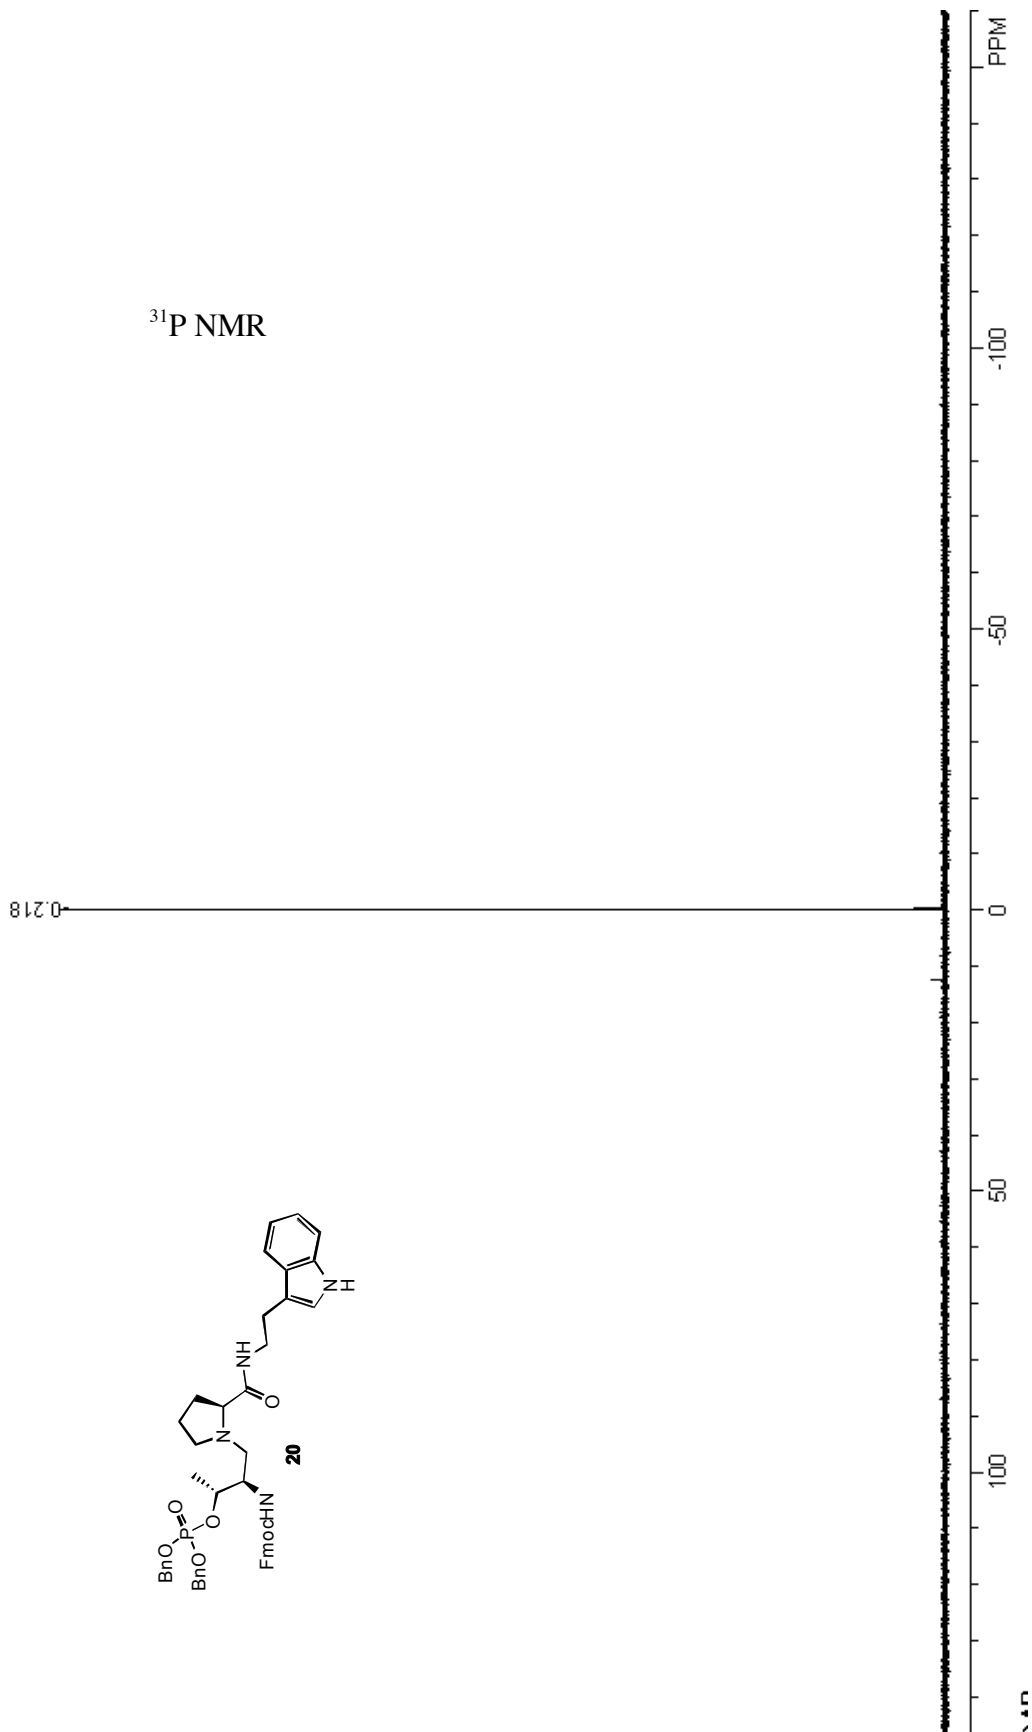





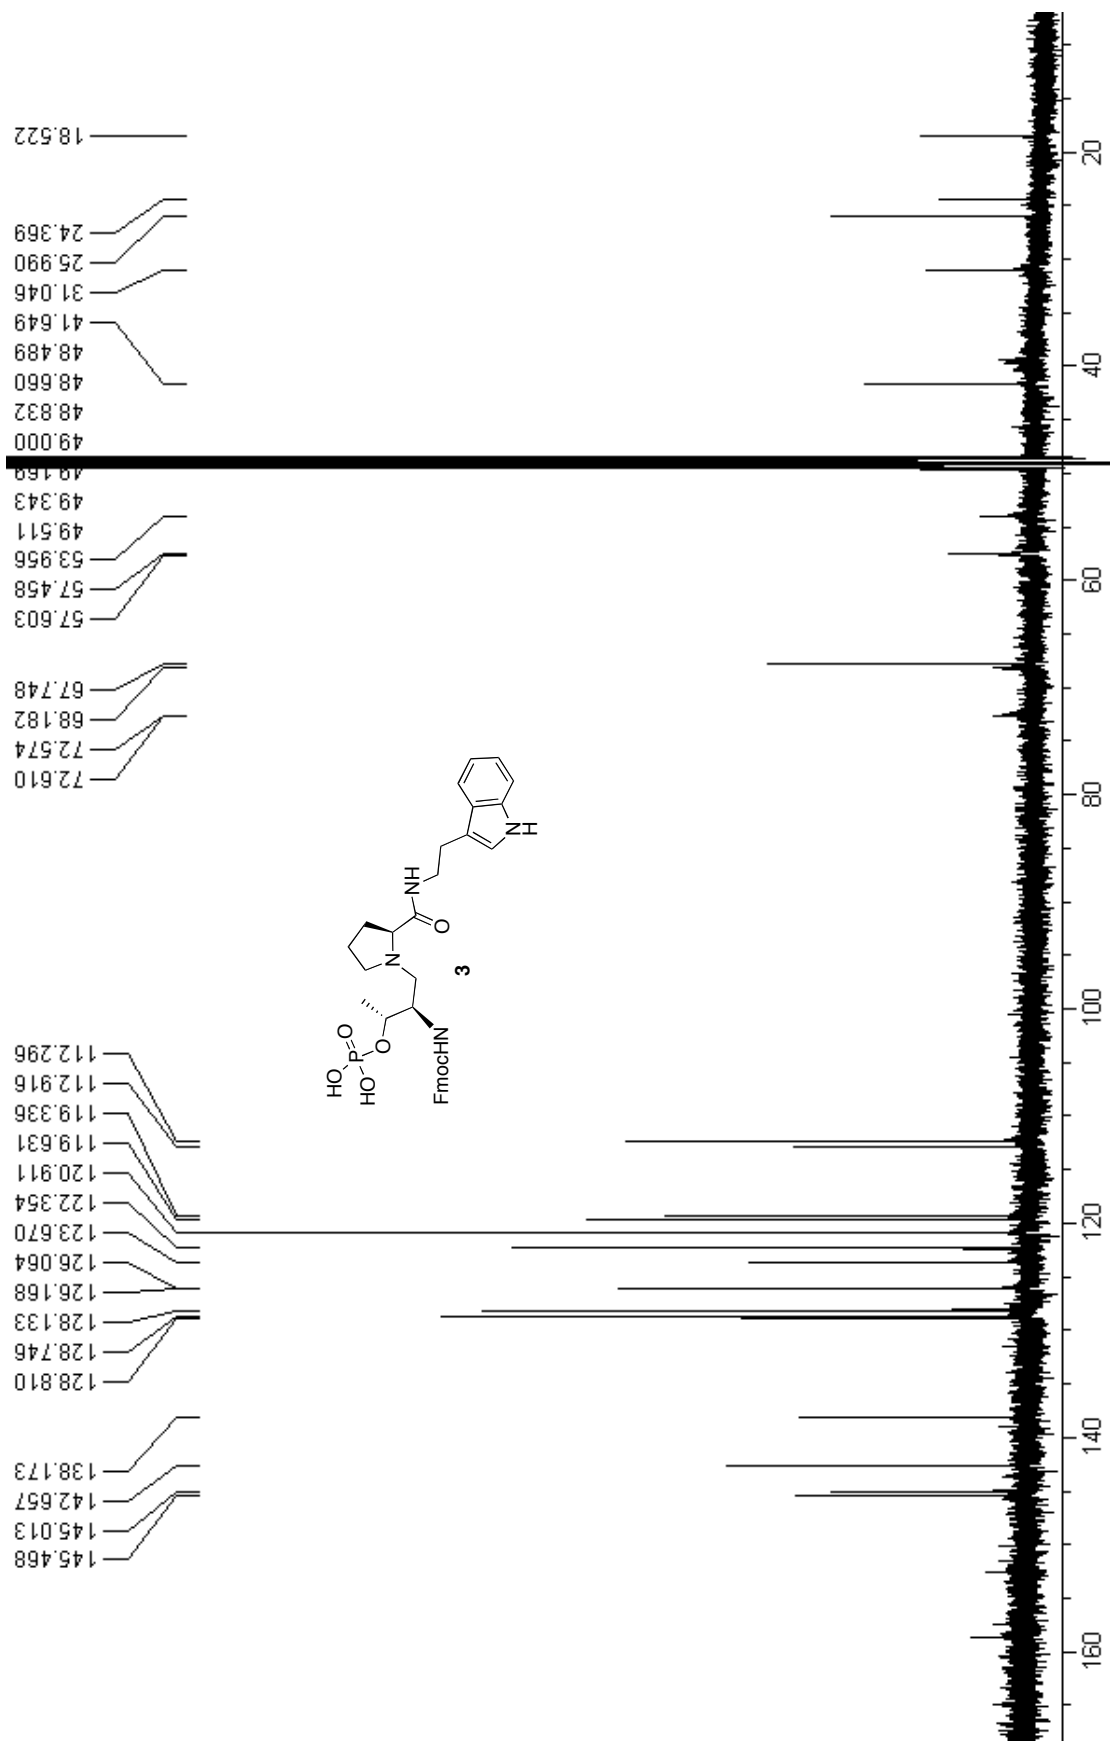

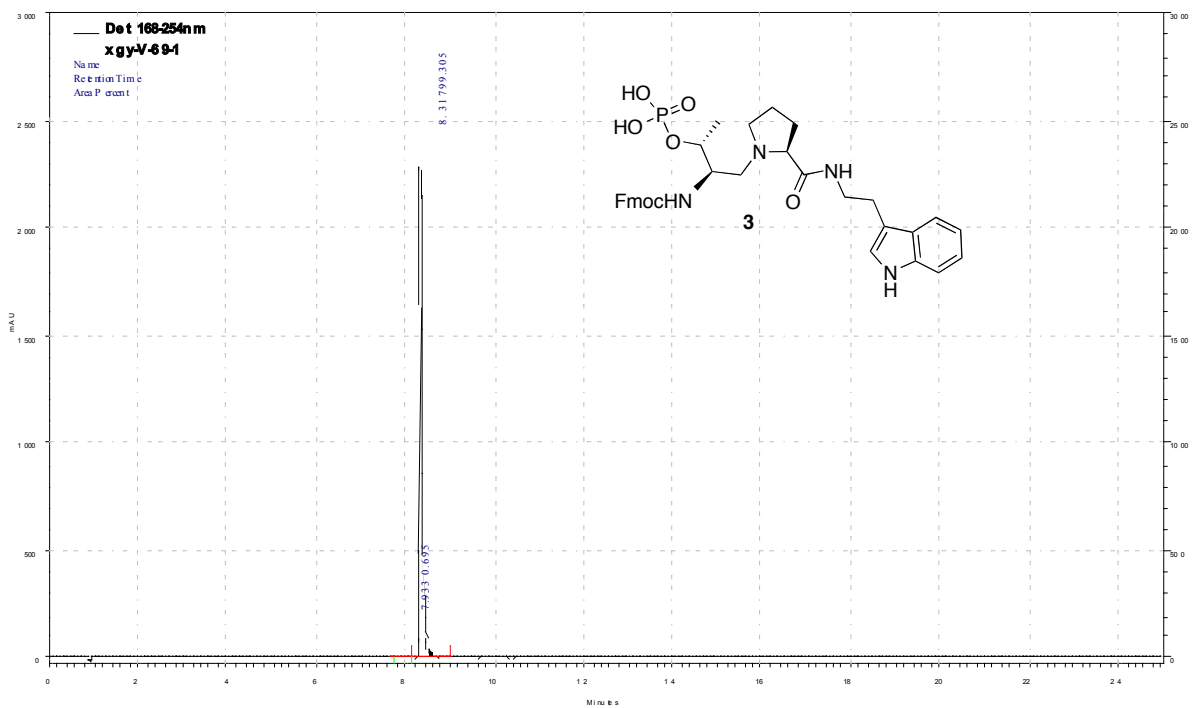

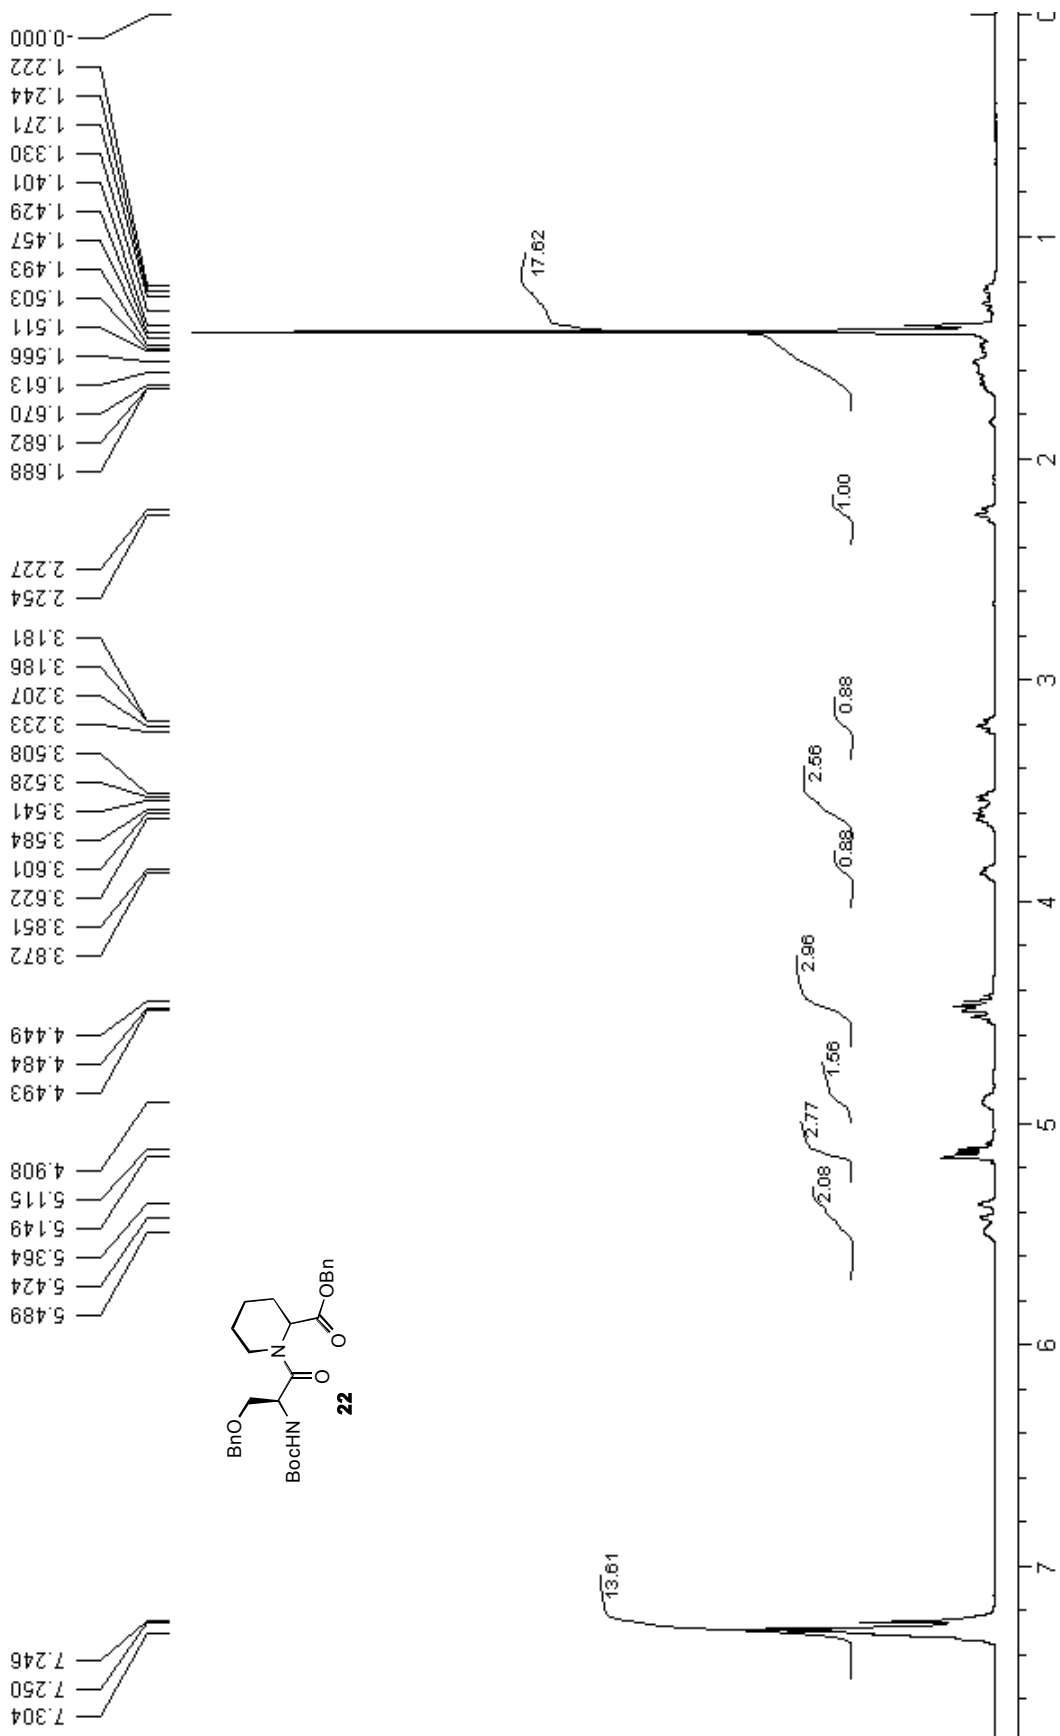

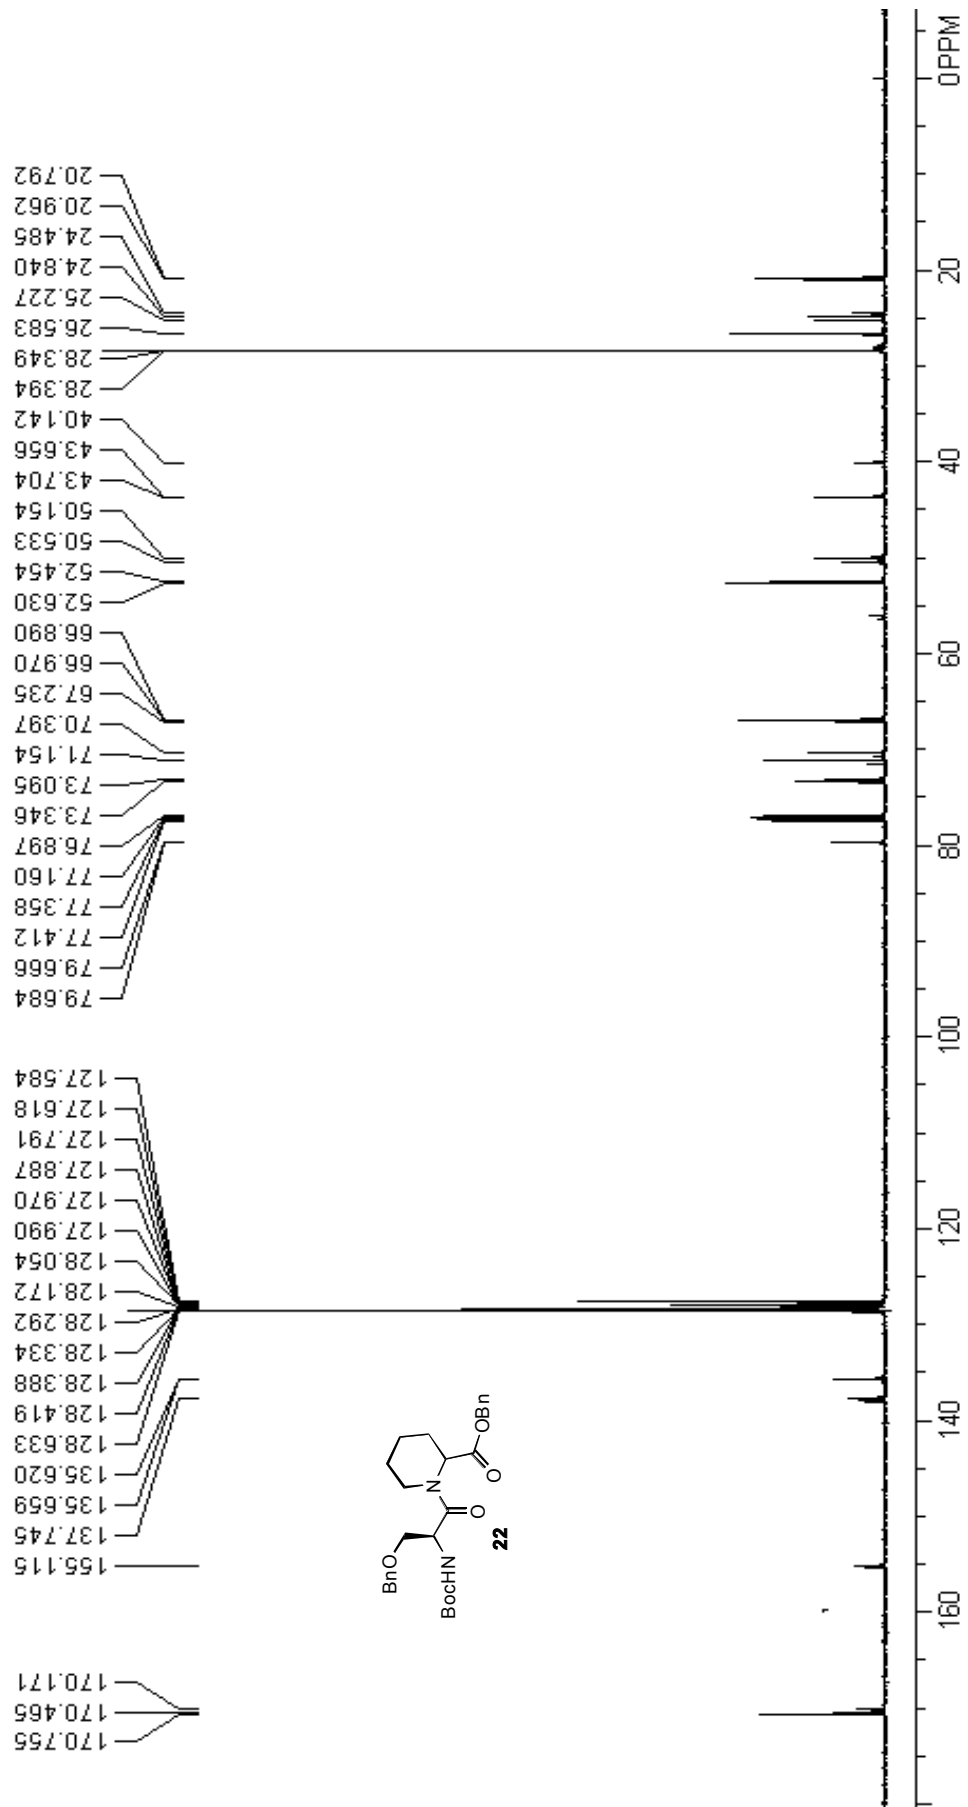

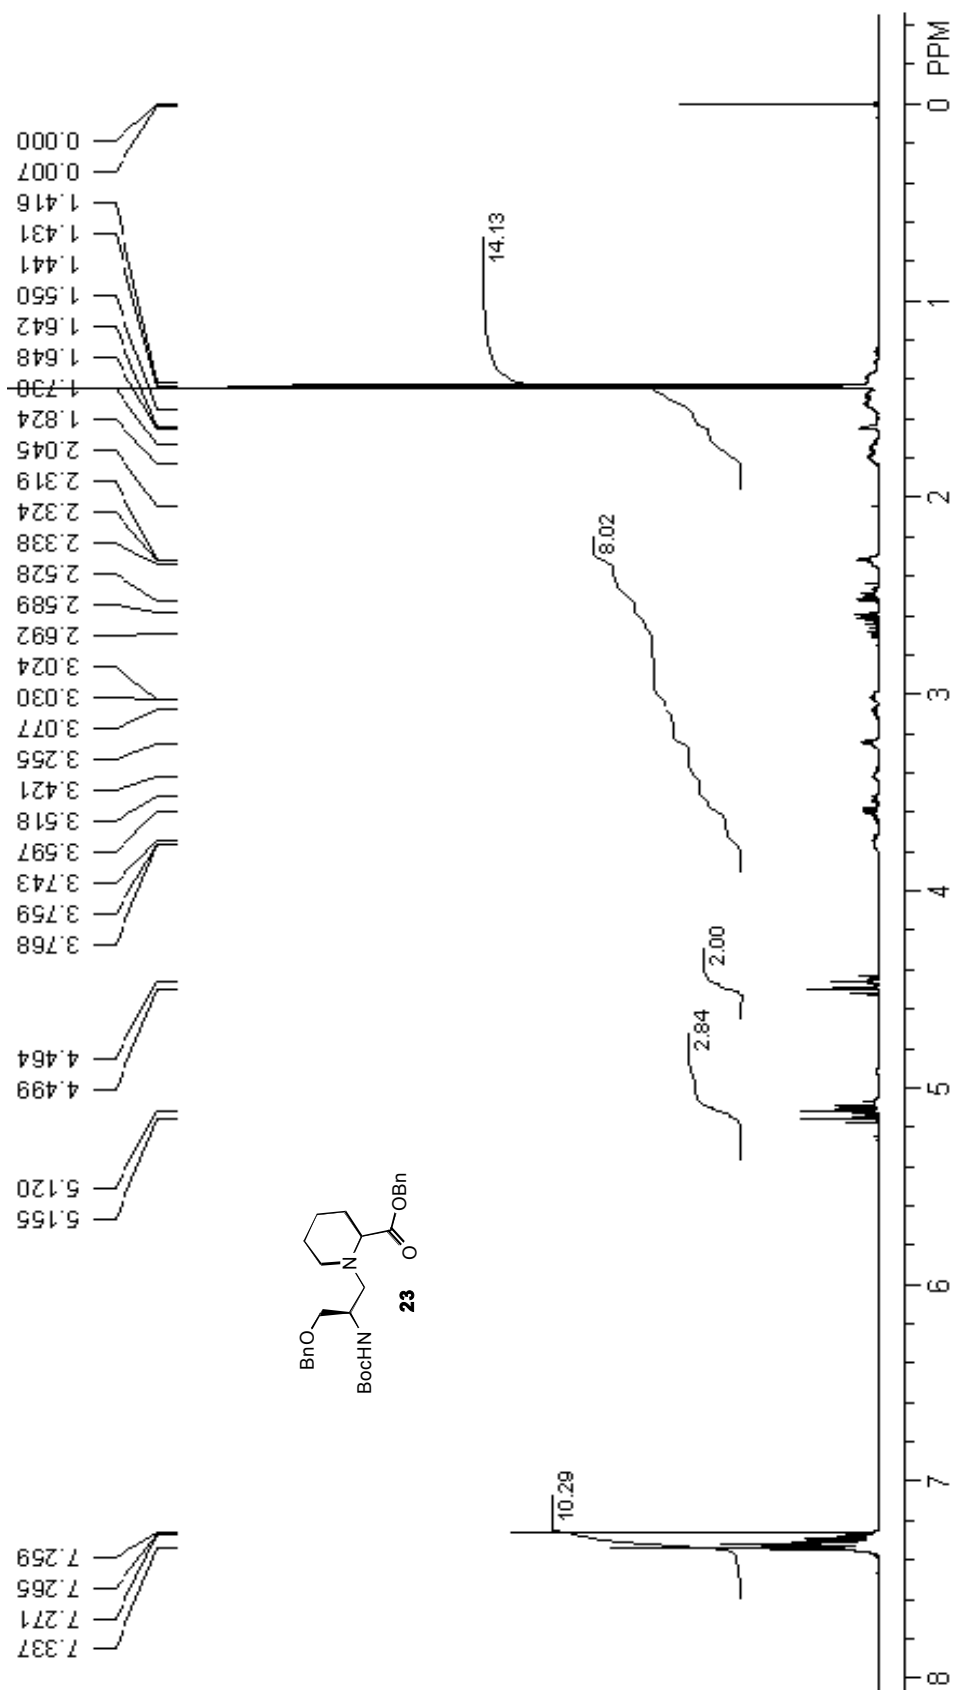

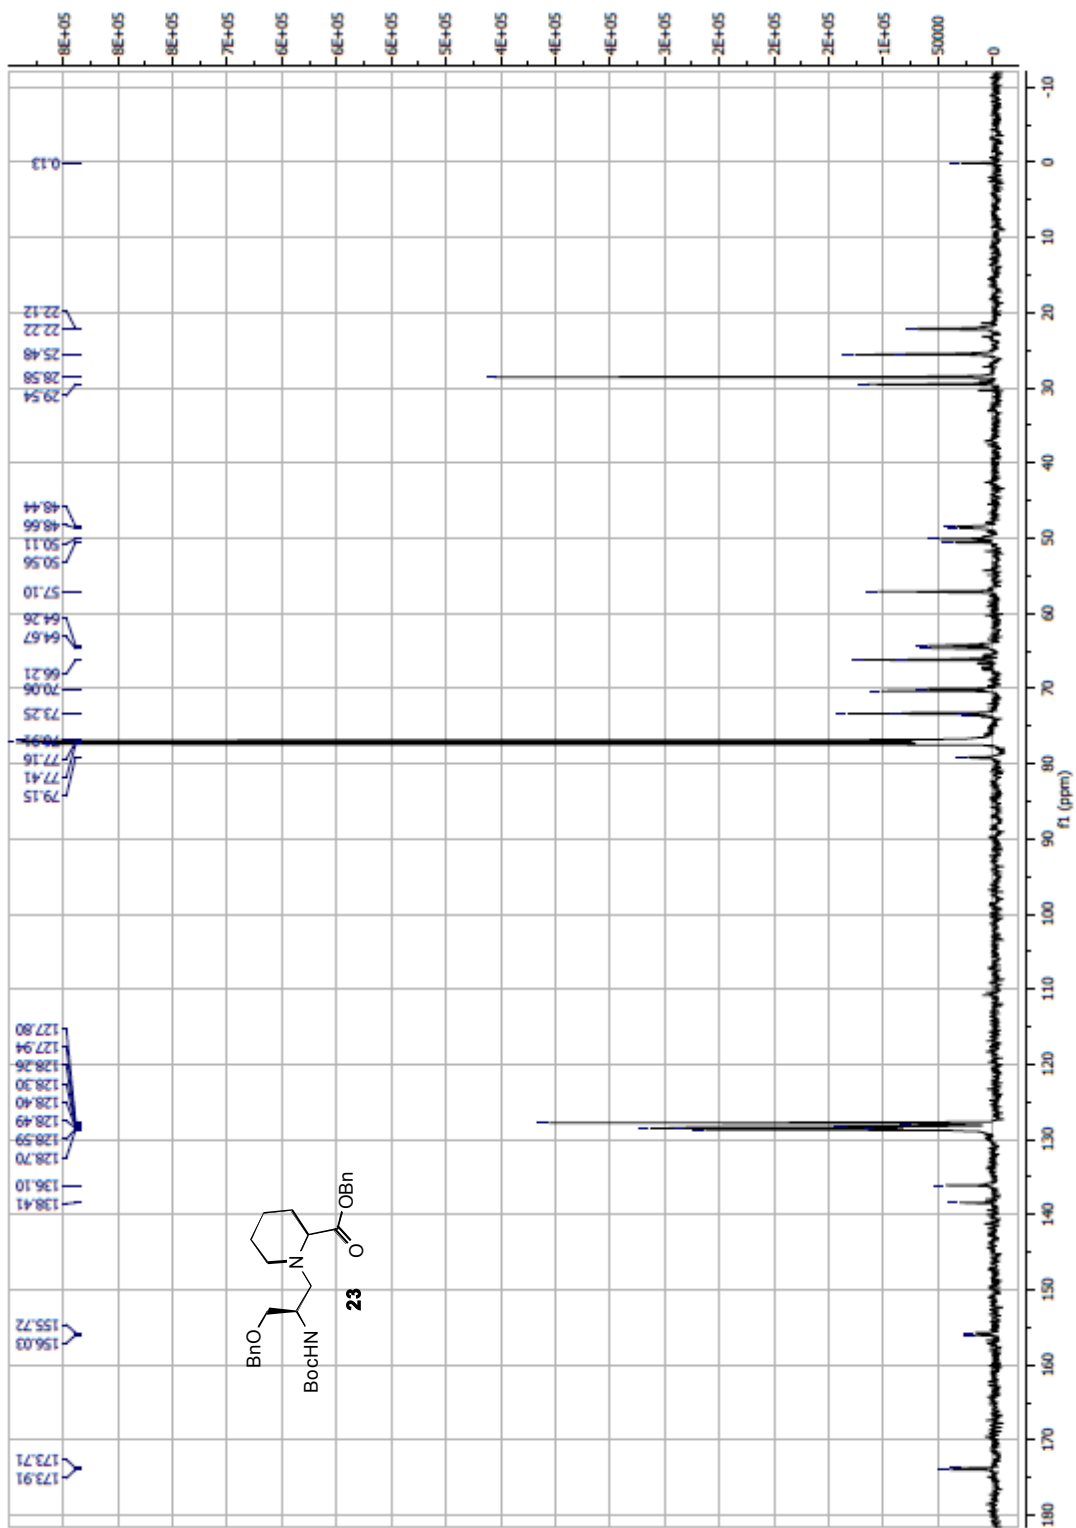

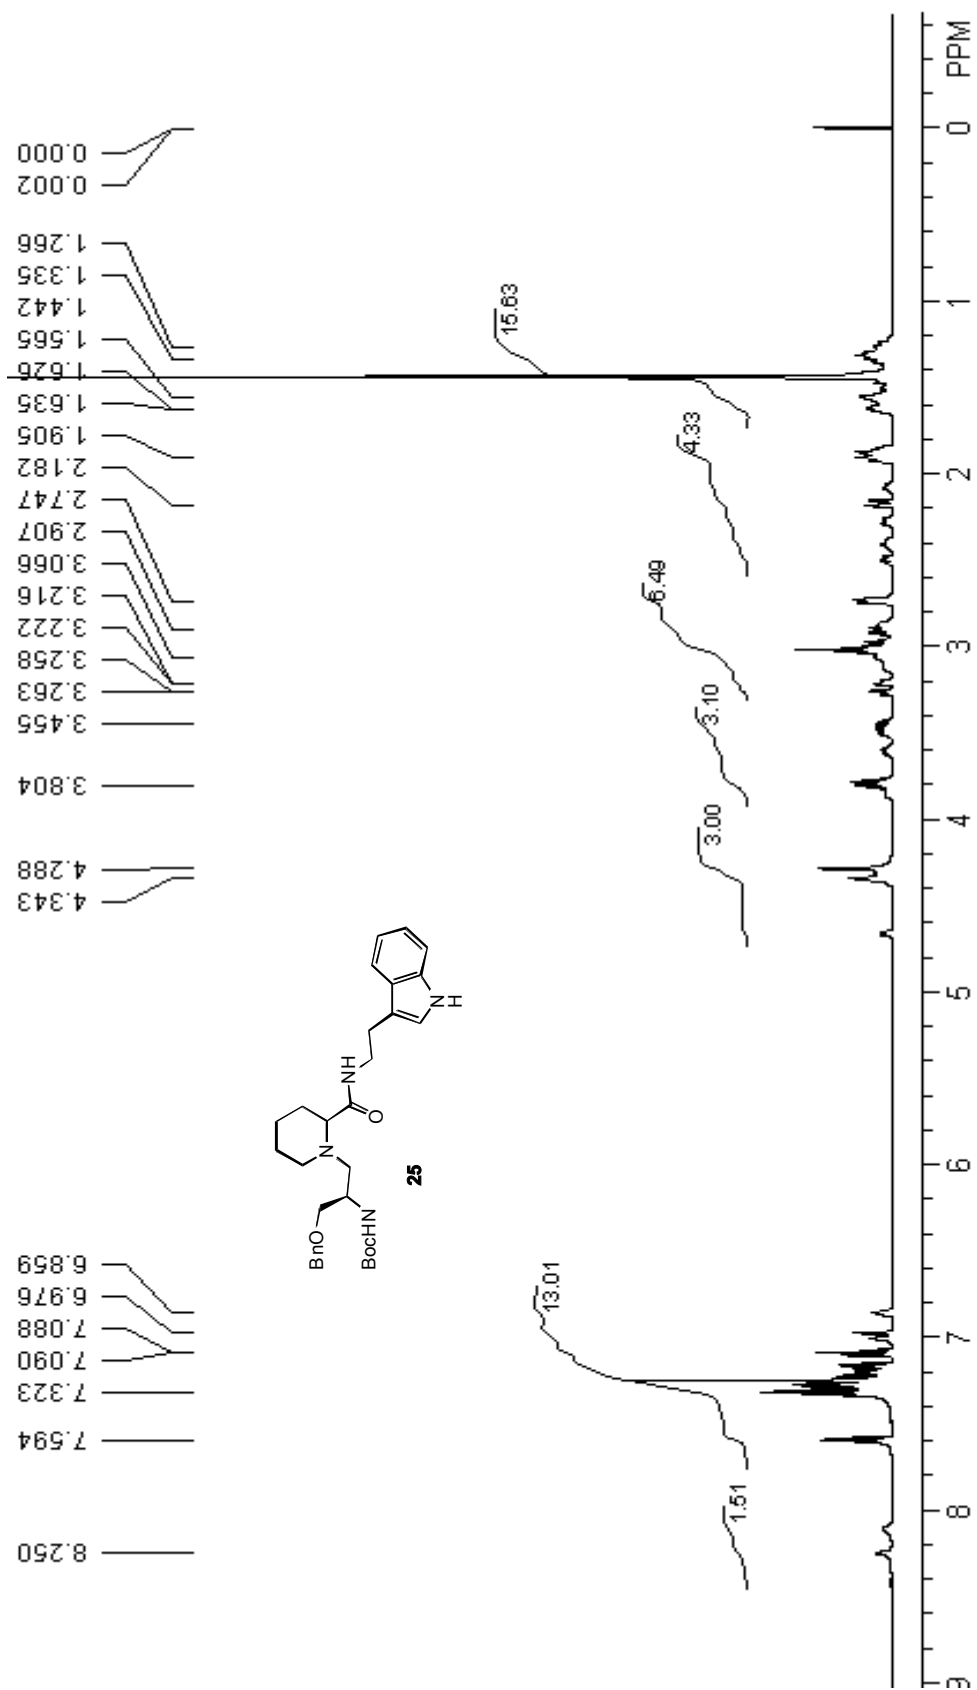

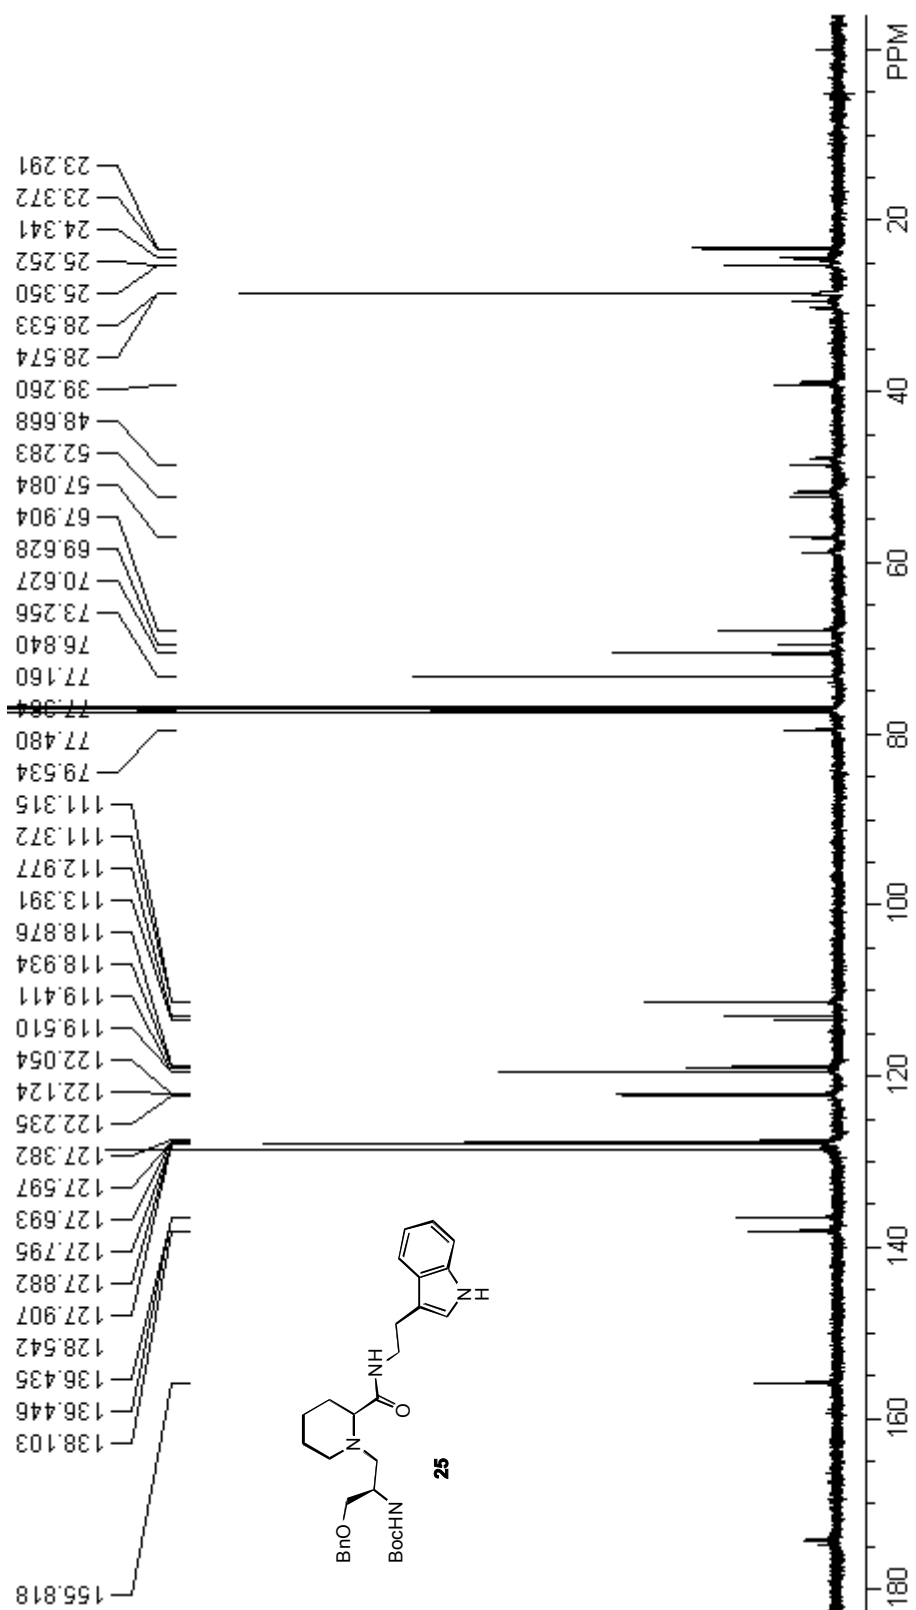



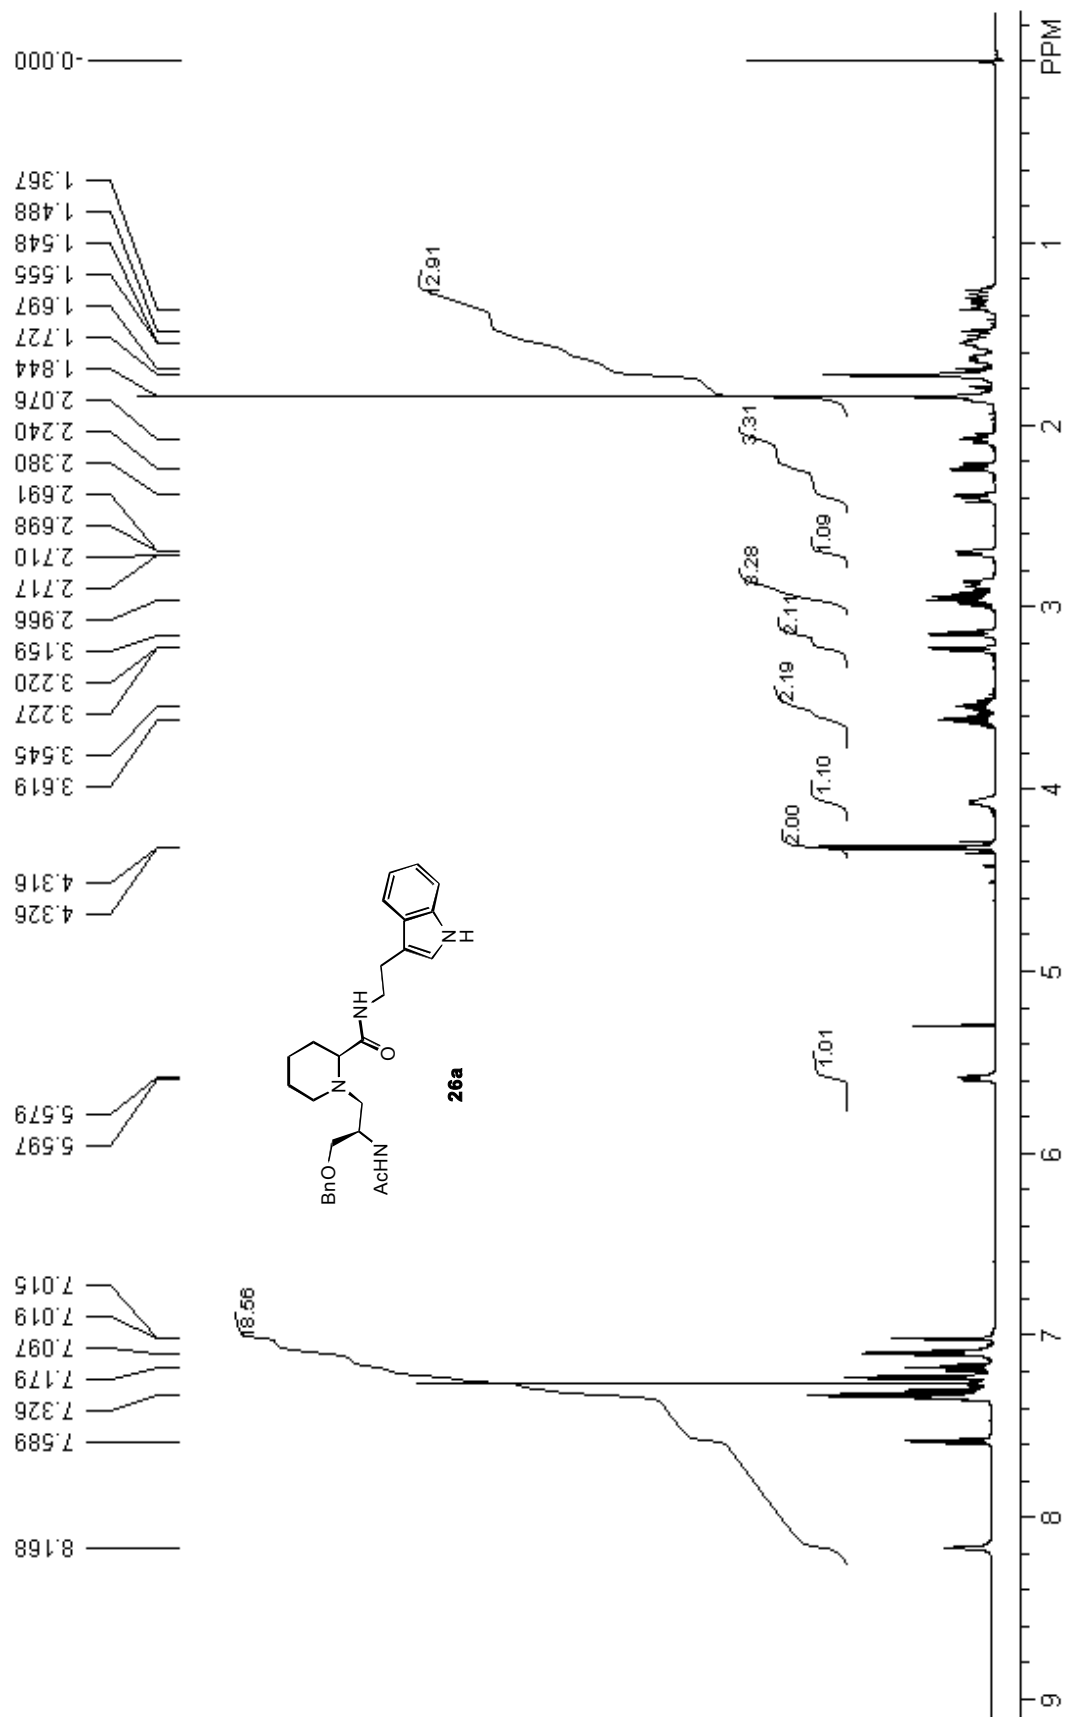

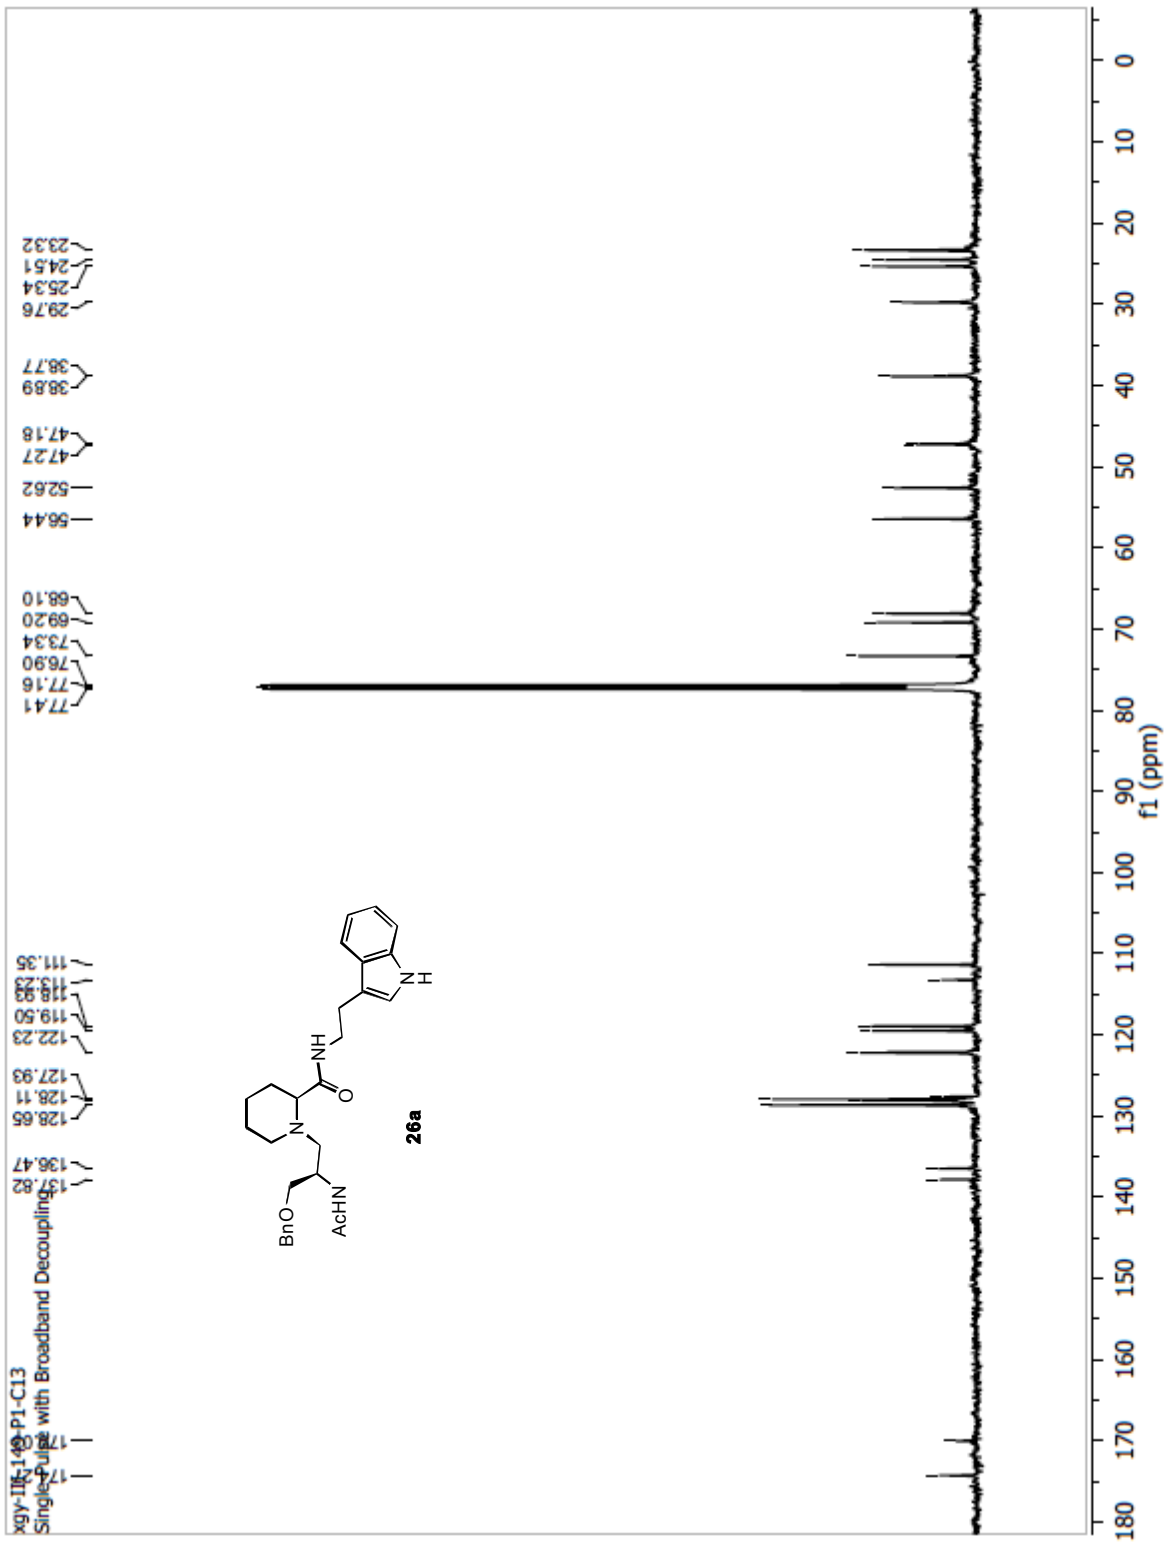

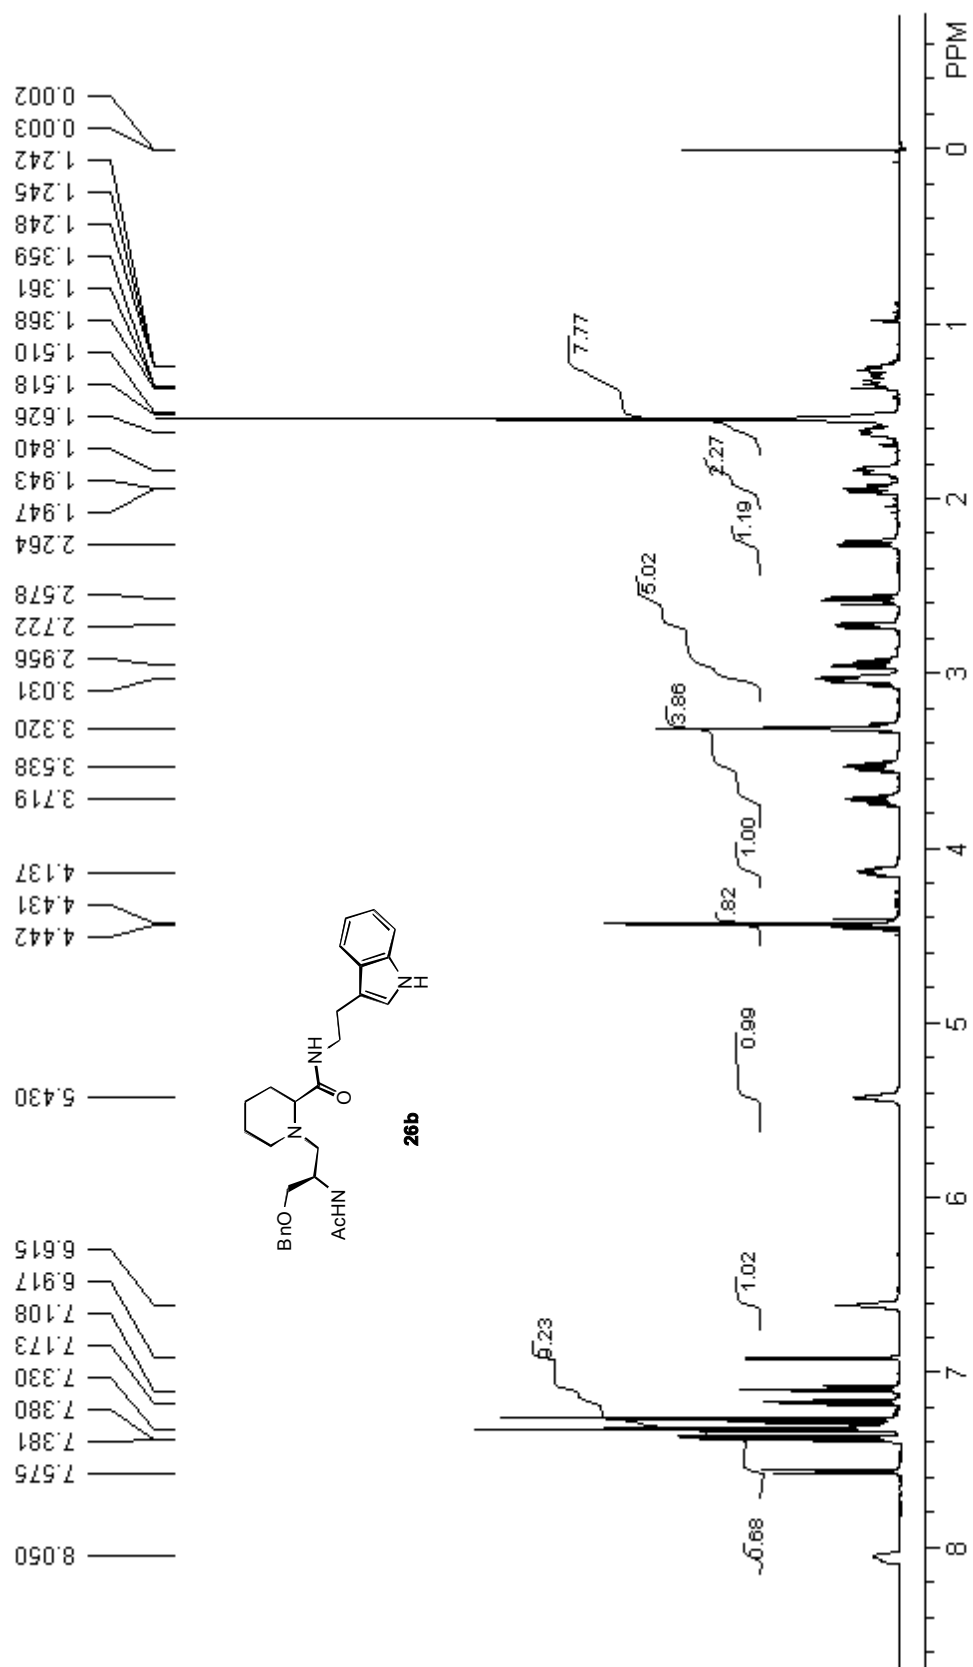

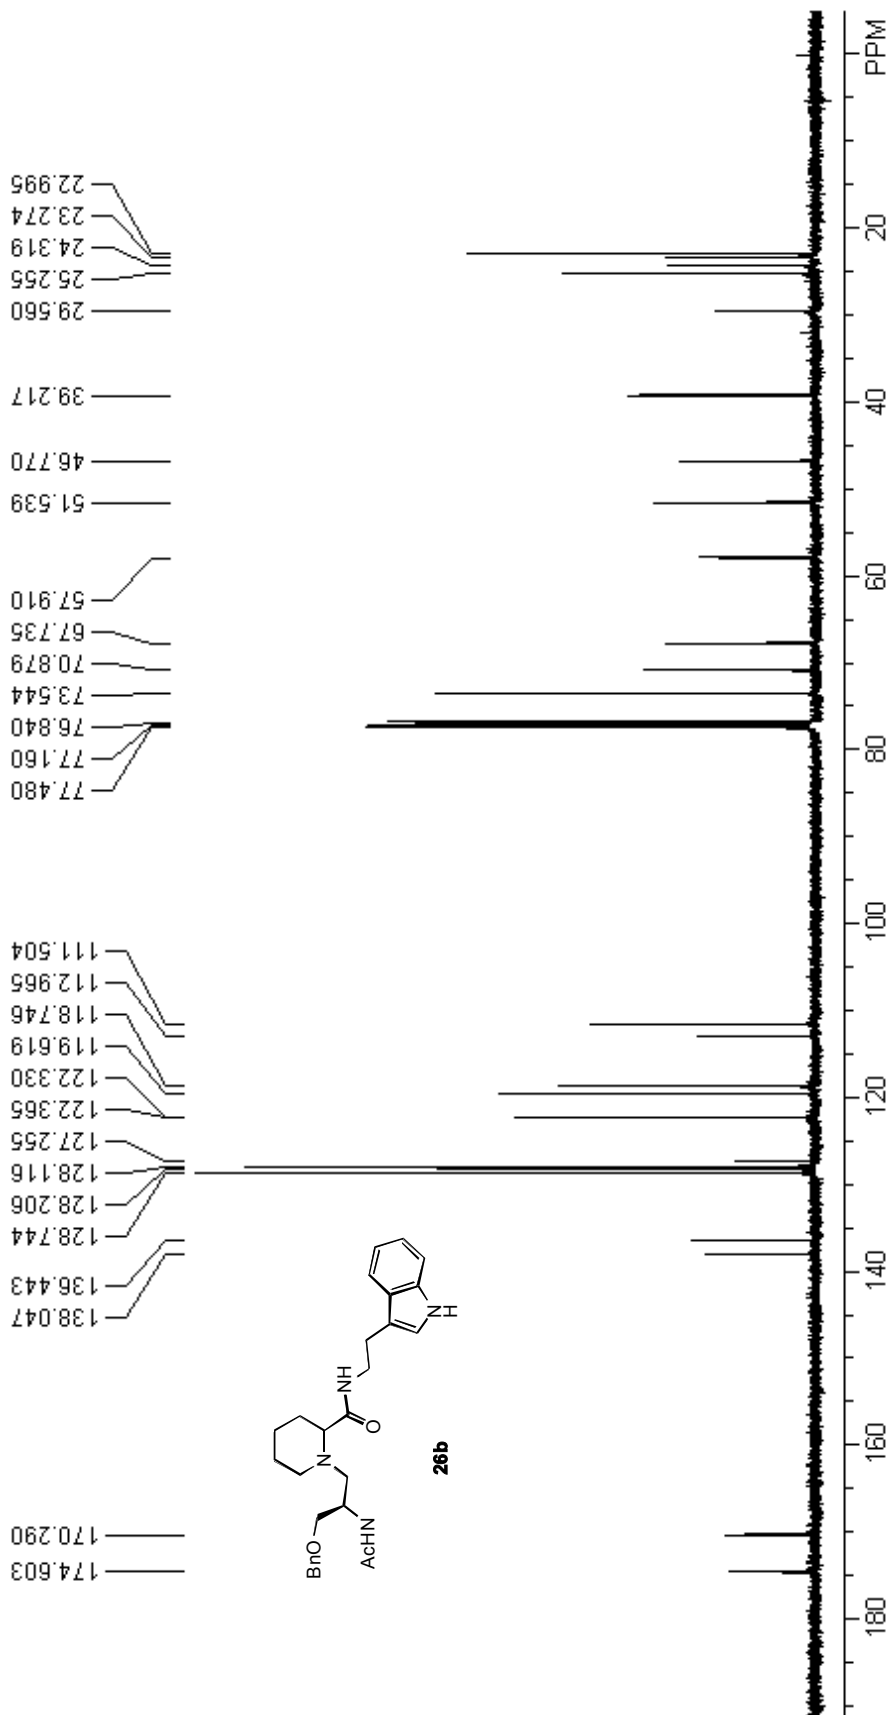

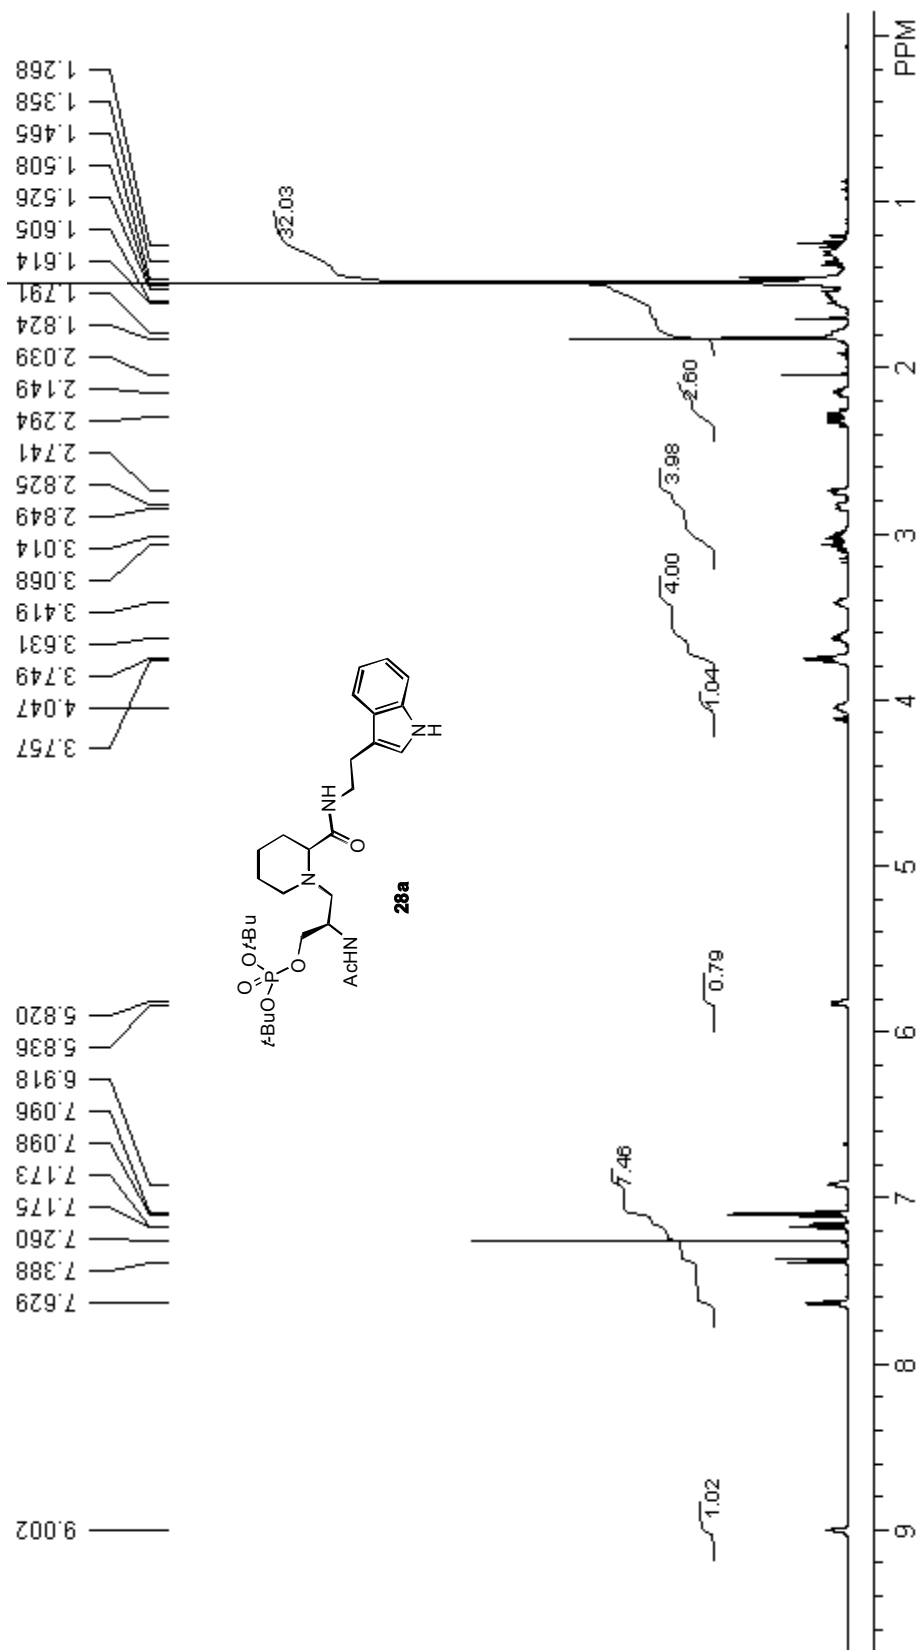

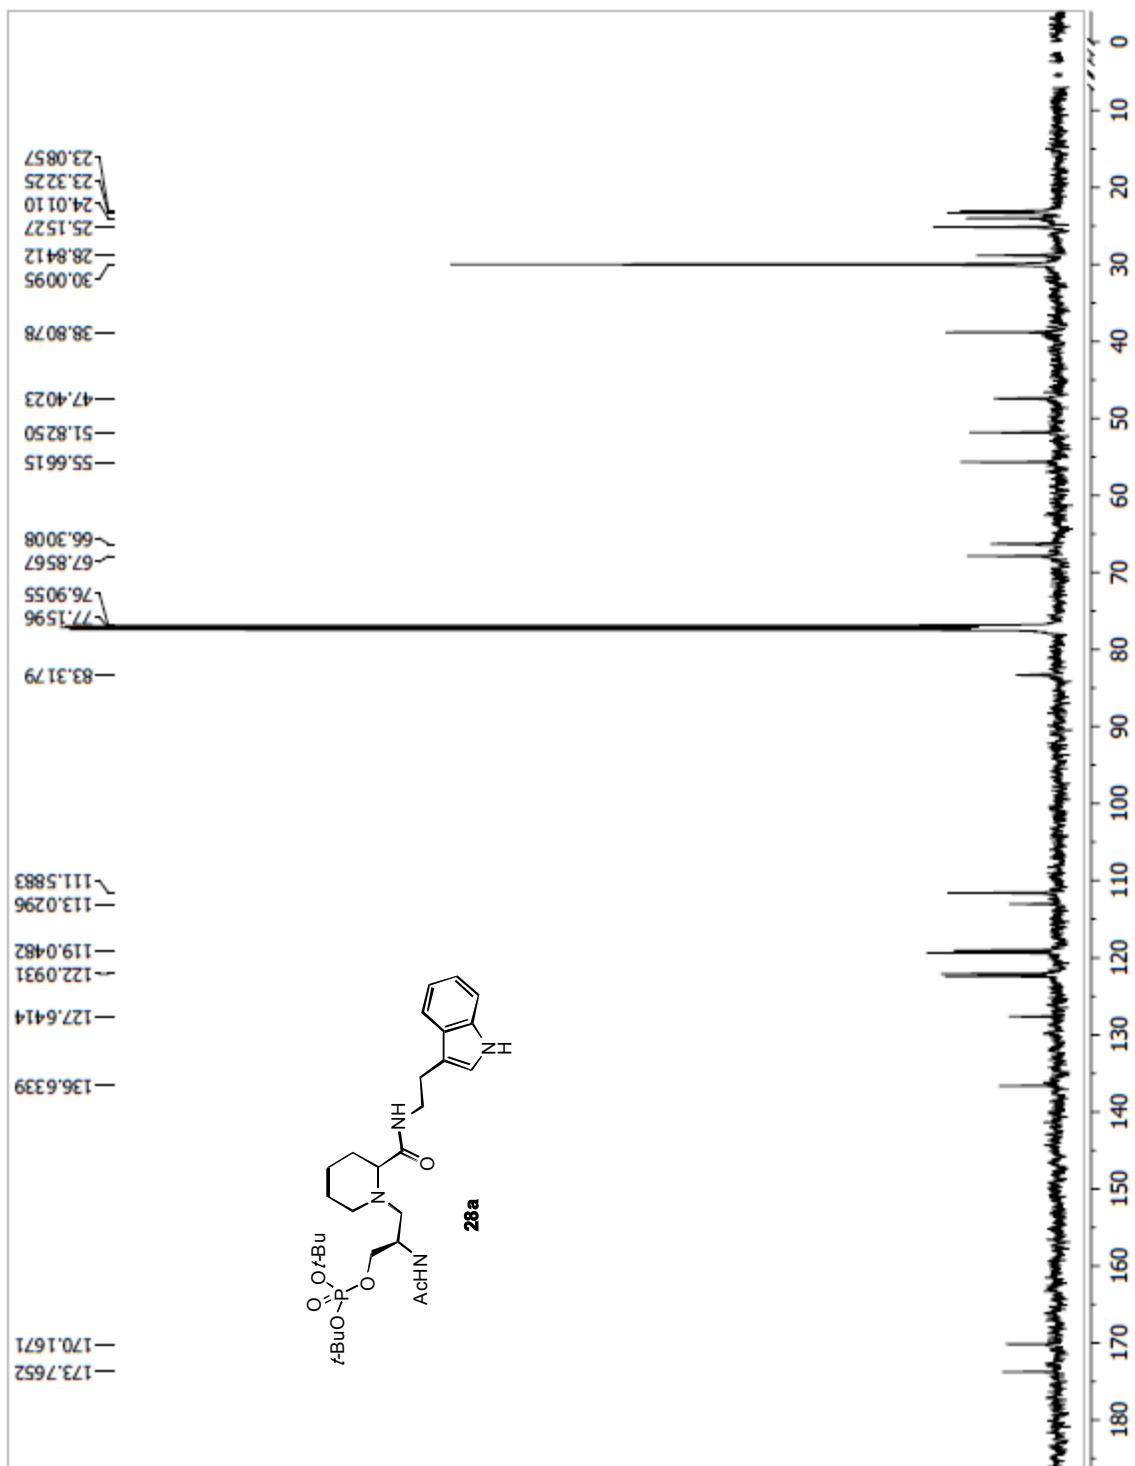

$^{31}\text{P}$  NMR

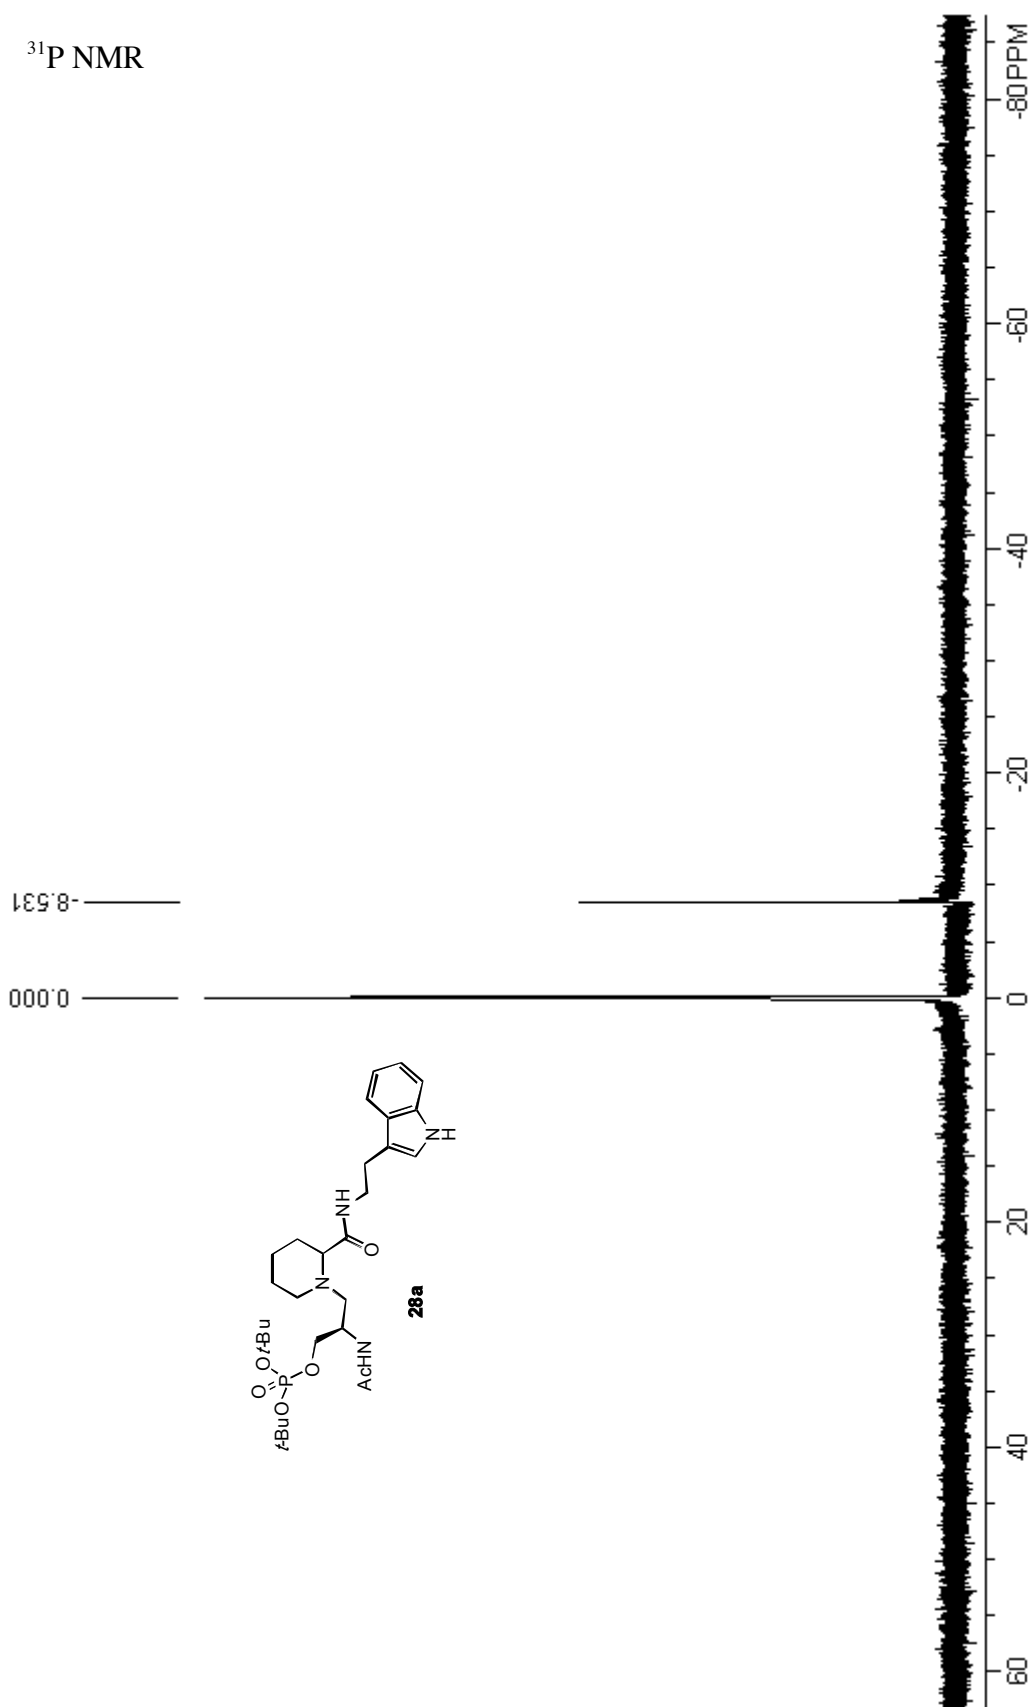

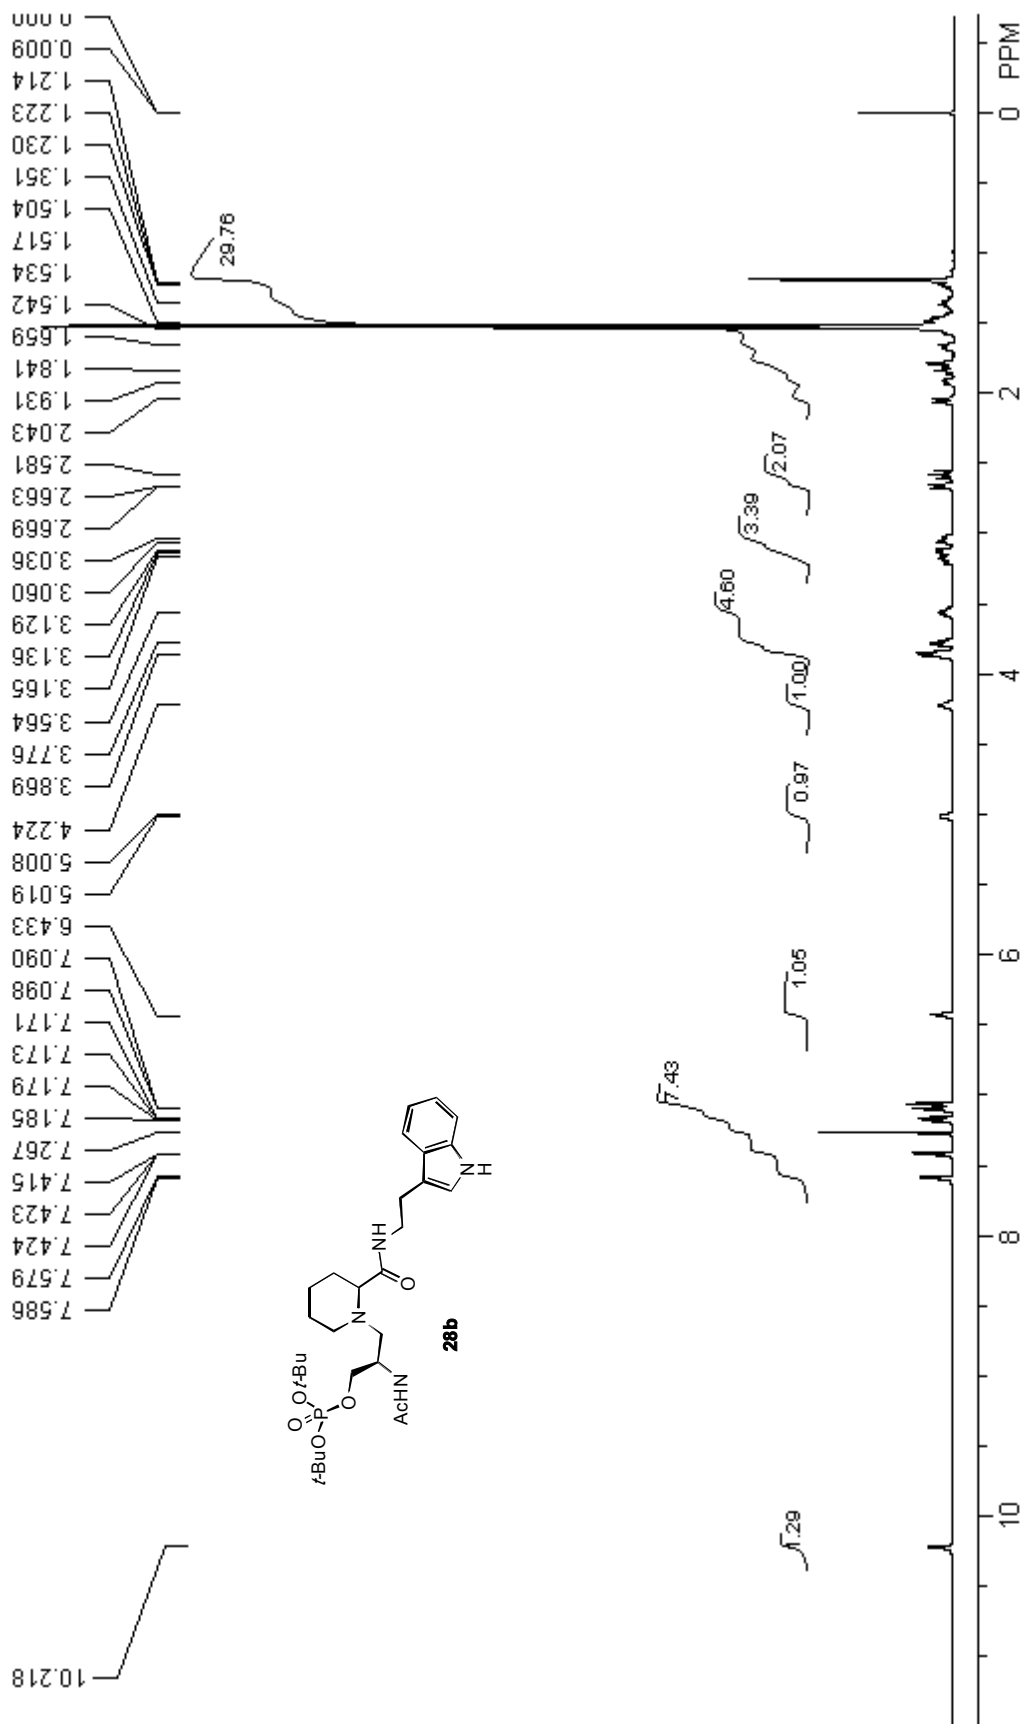



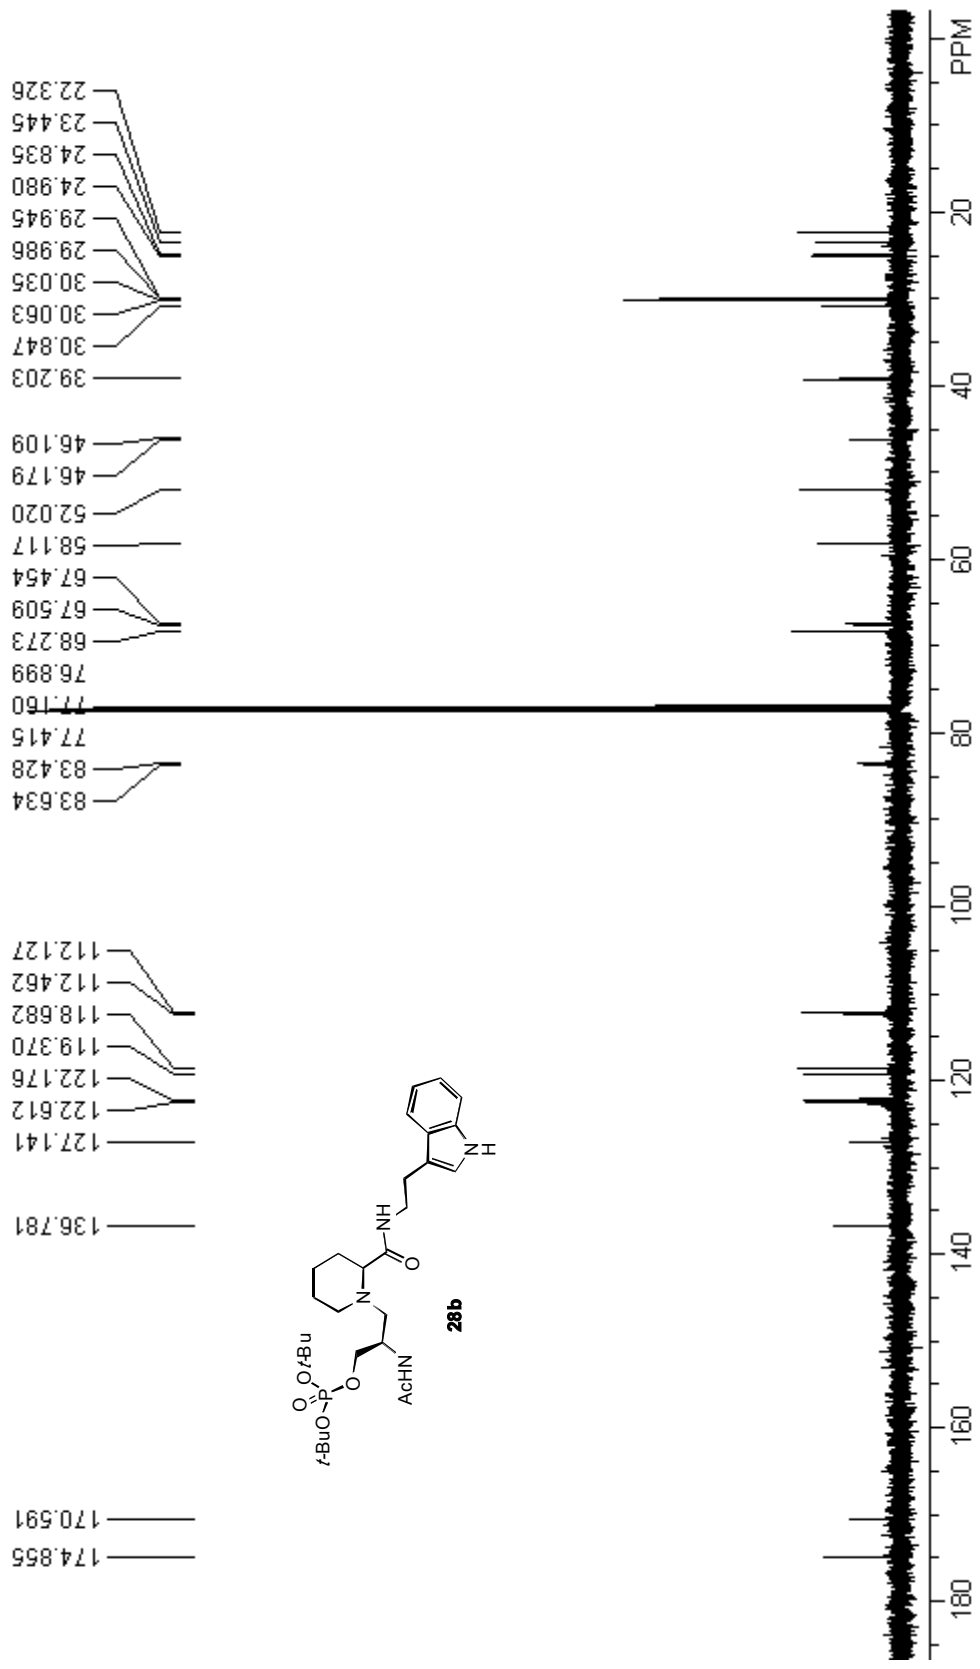

$^{31}\text{P}$  NMR

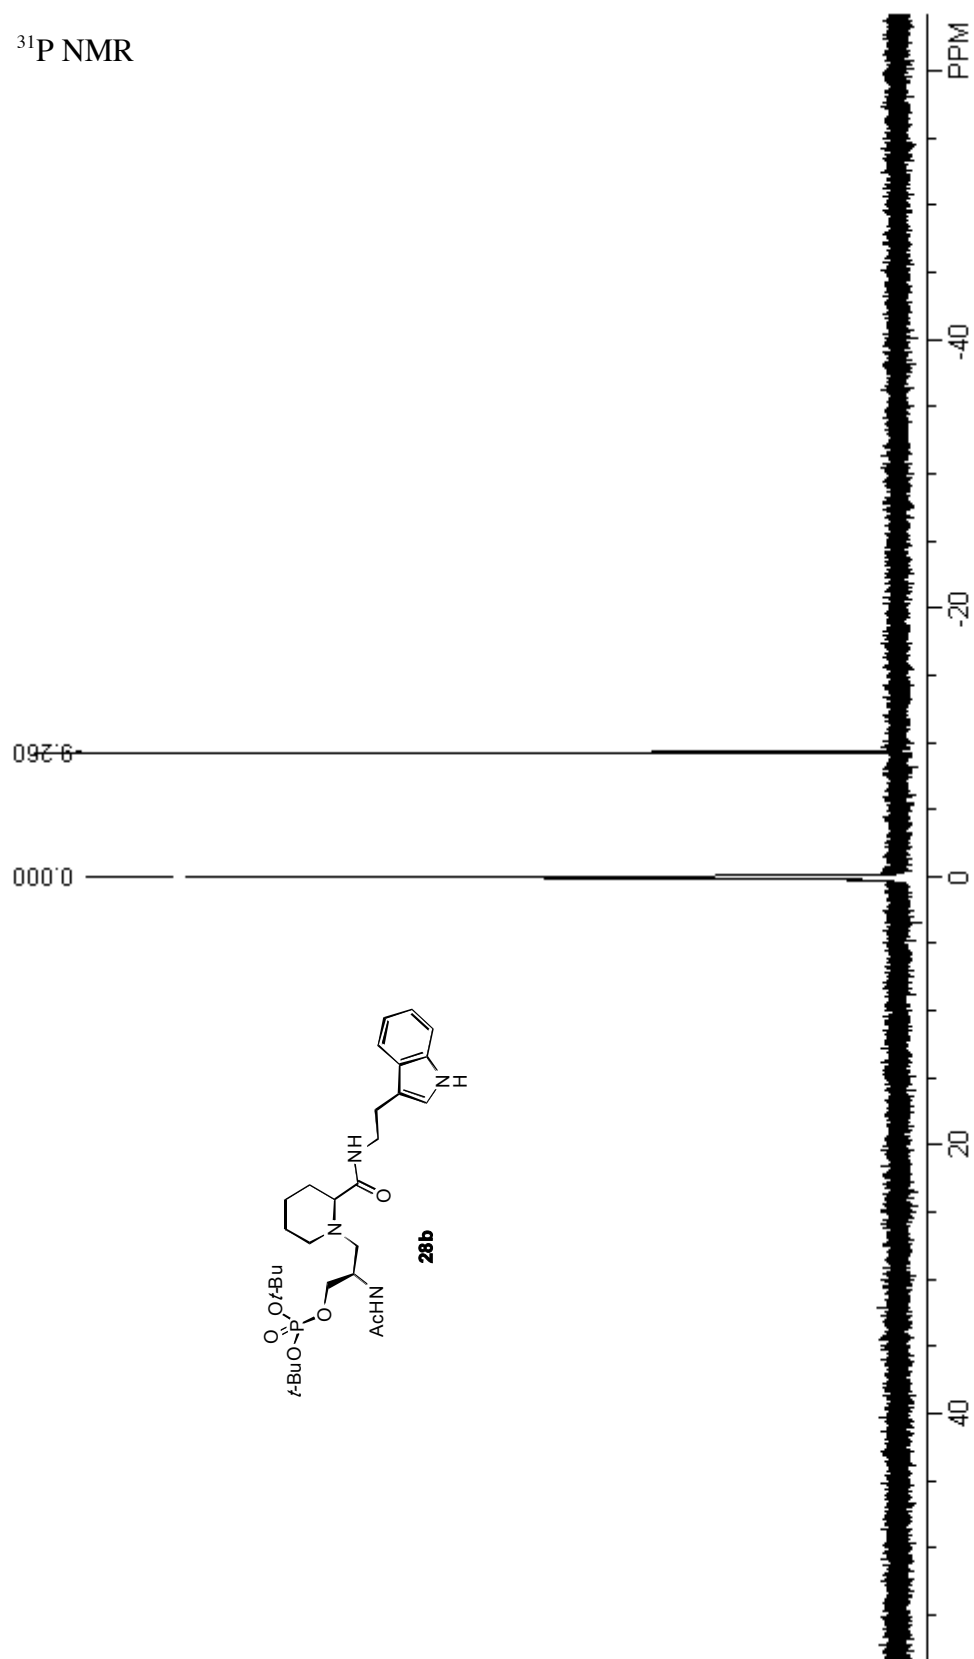

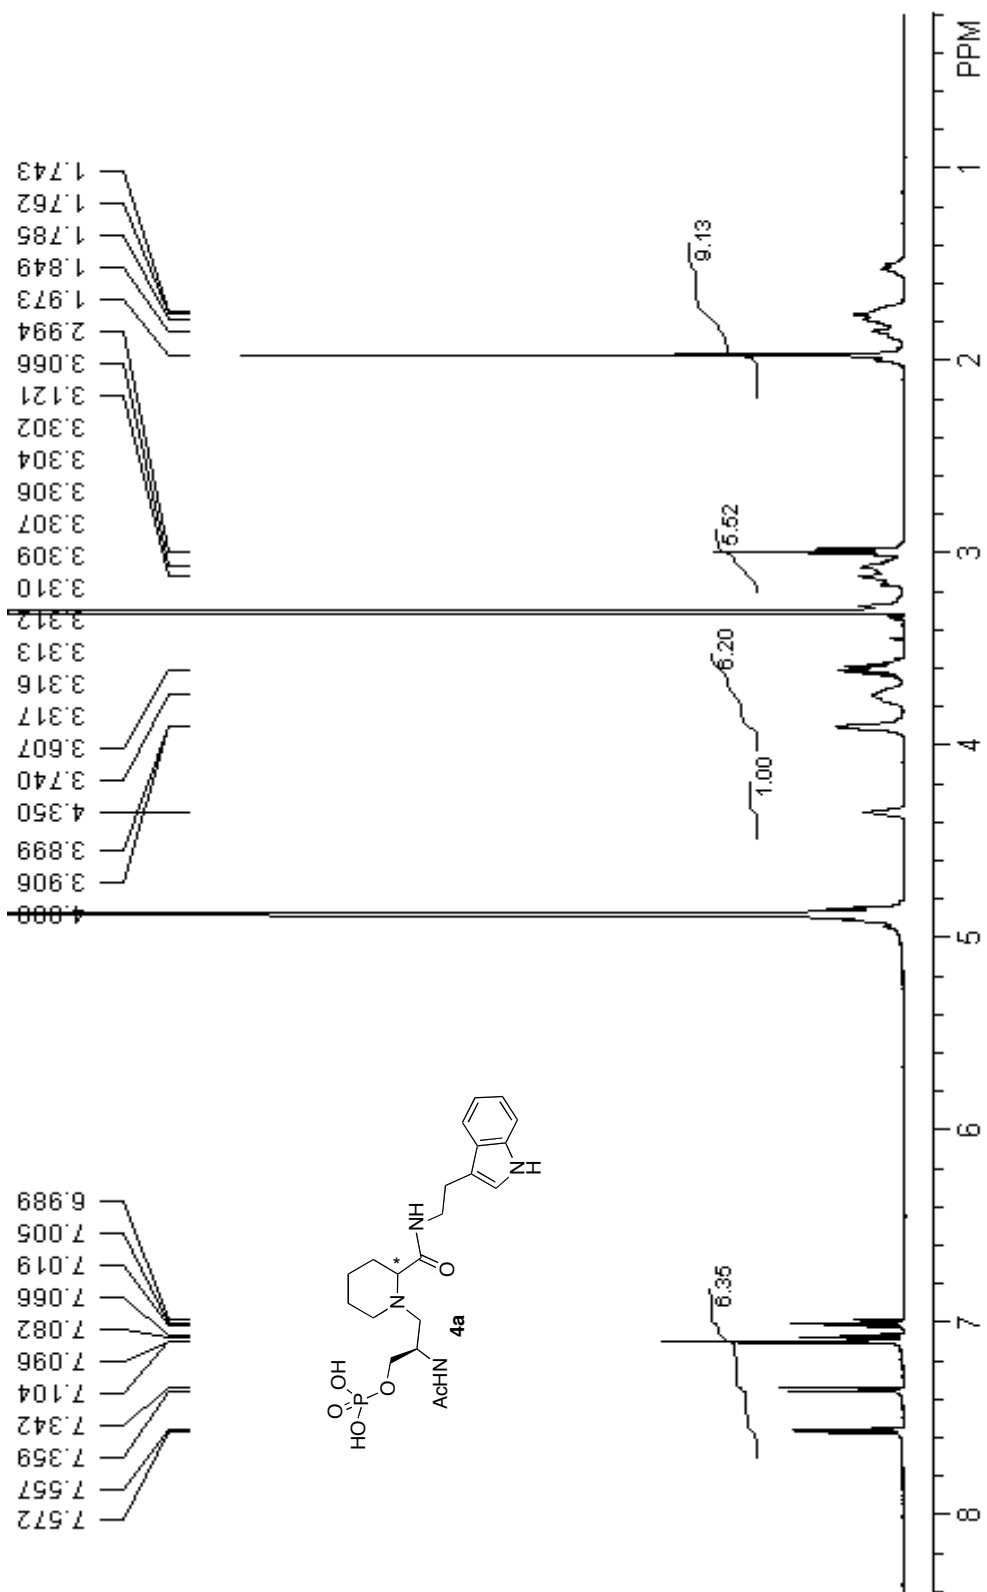

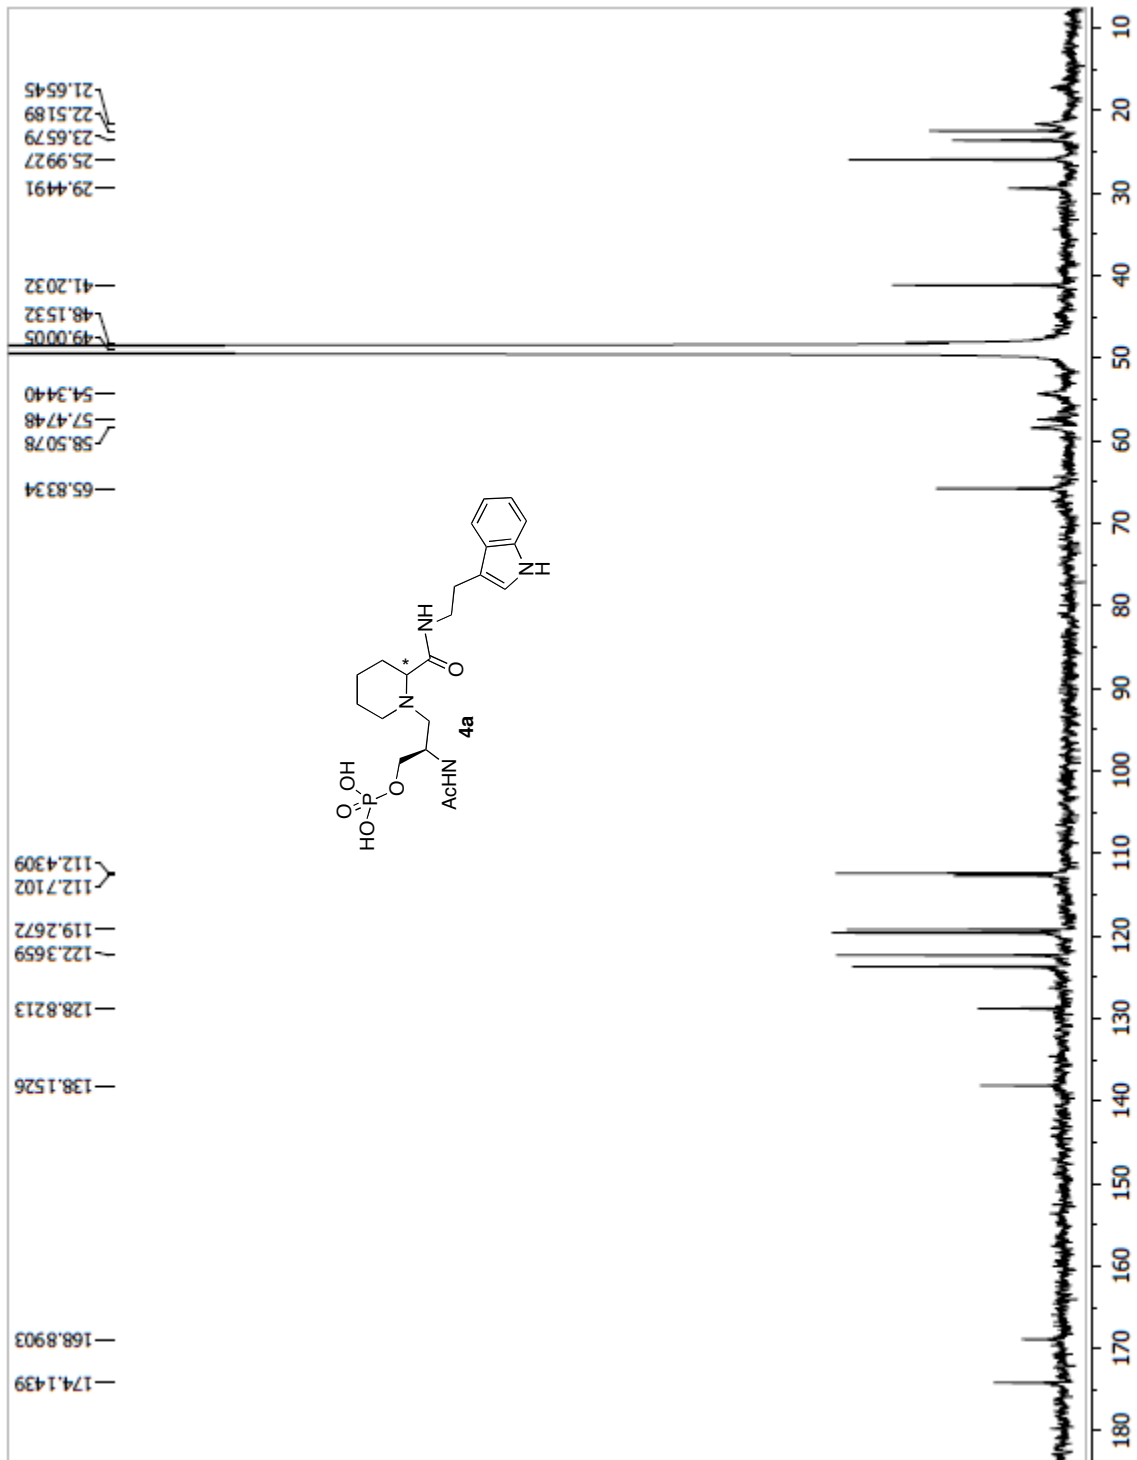

$^{31}\text{P}$  NMR

0.694

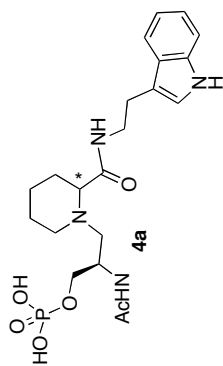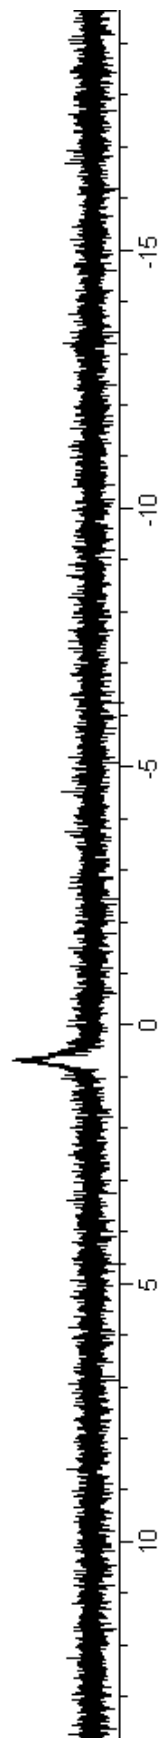

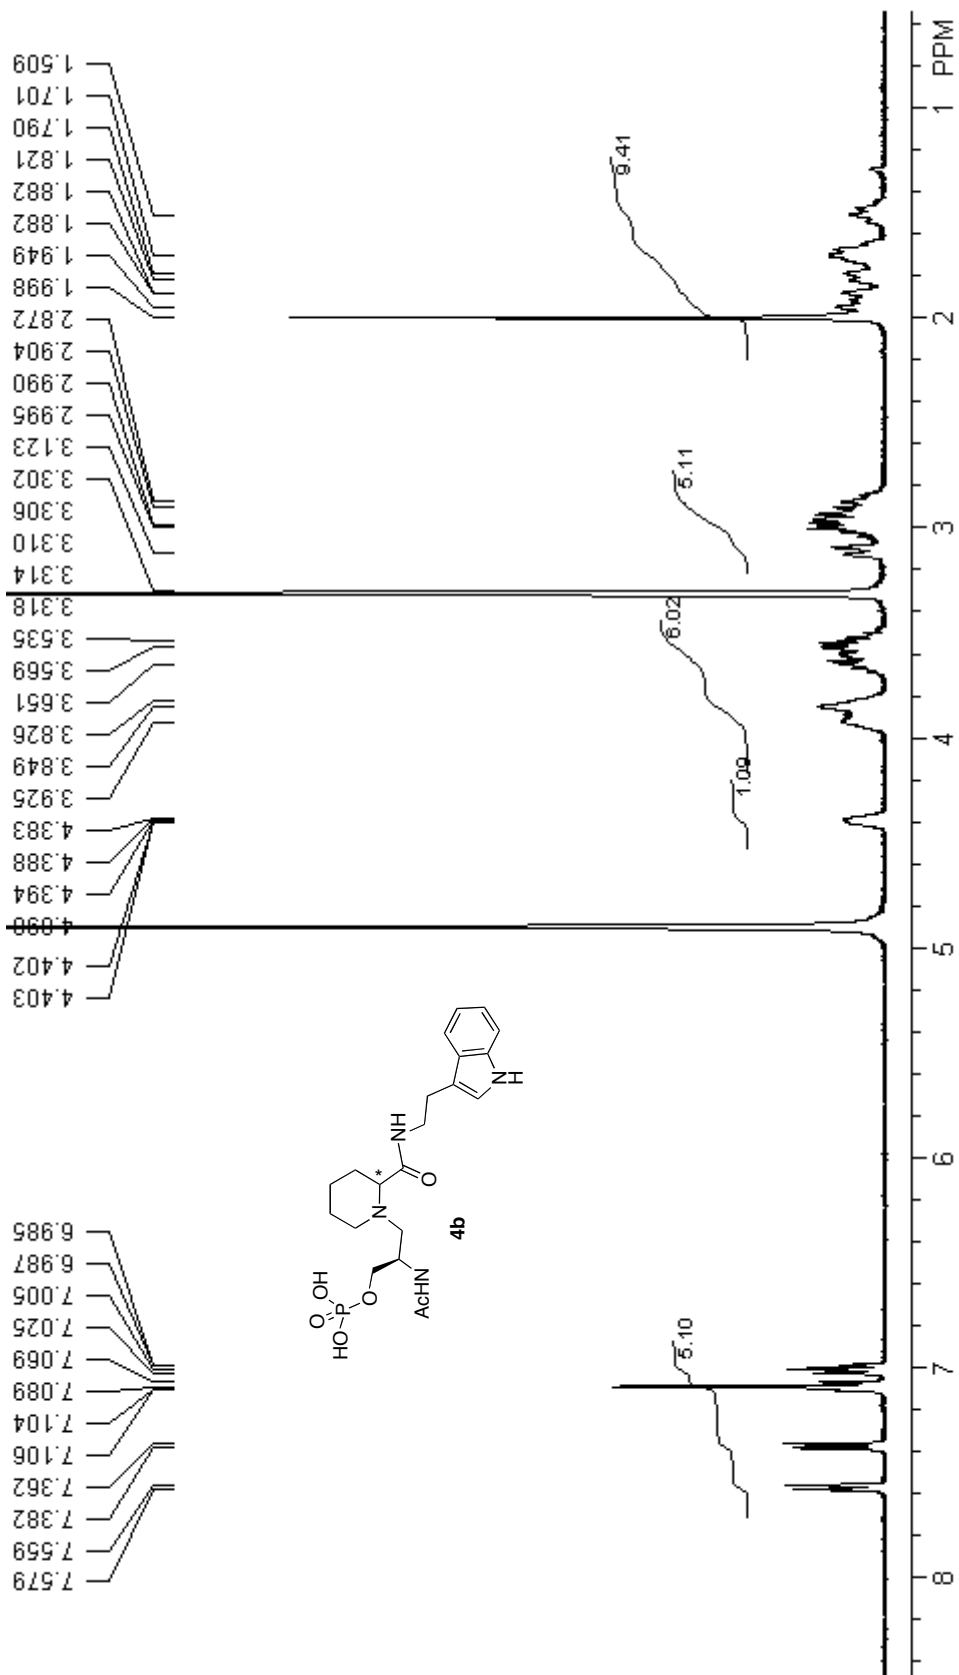

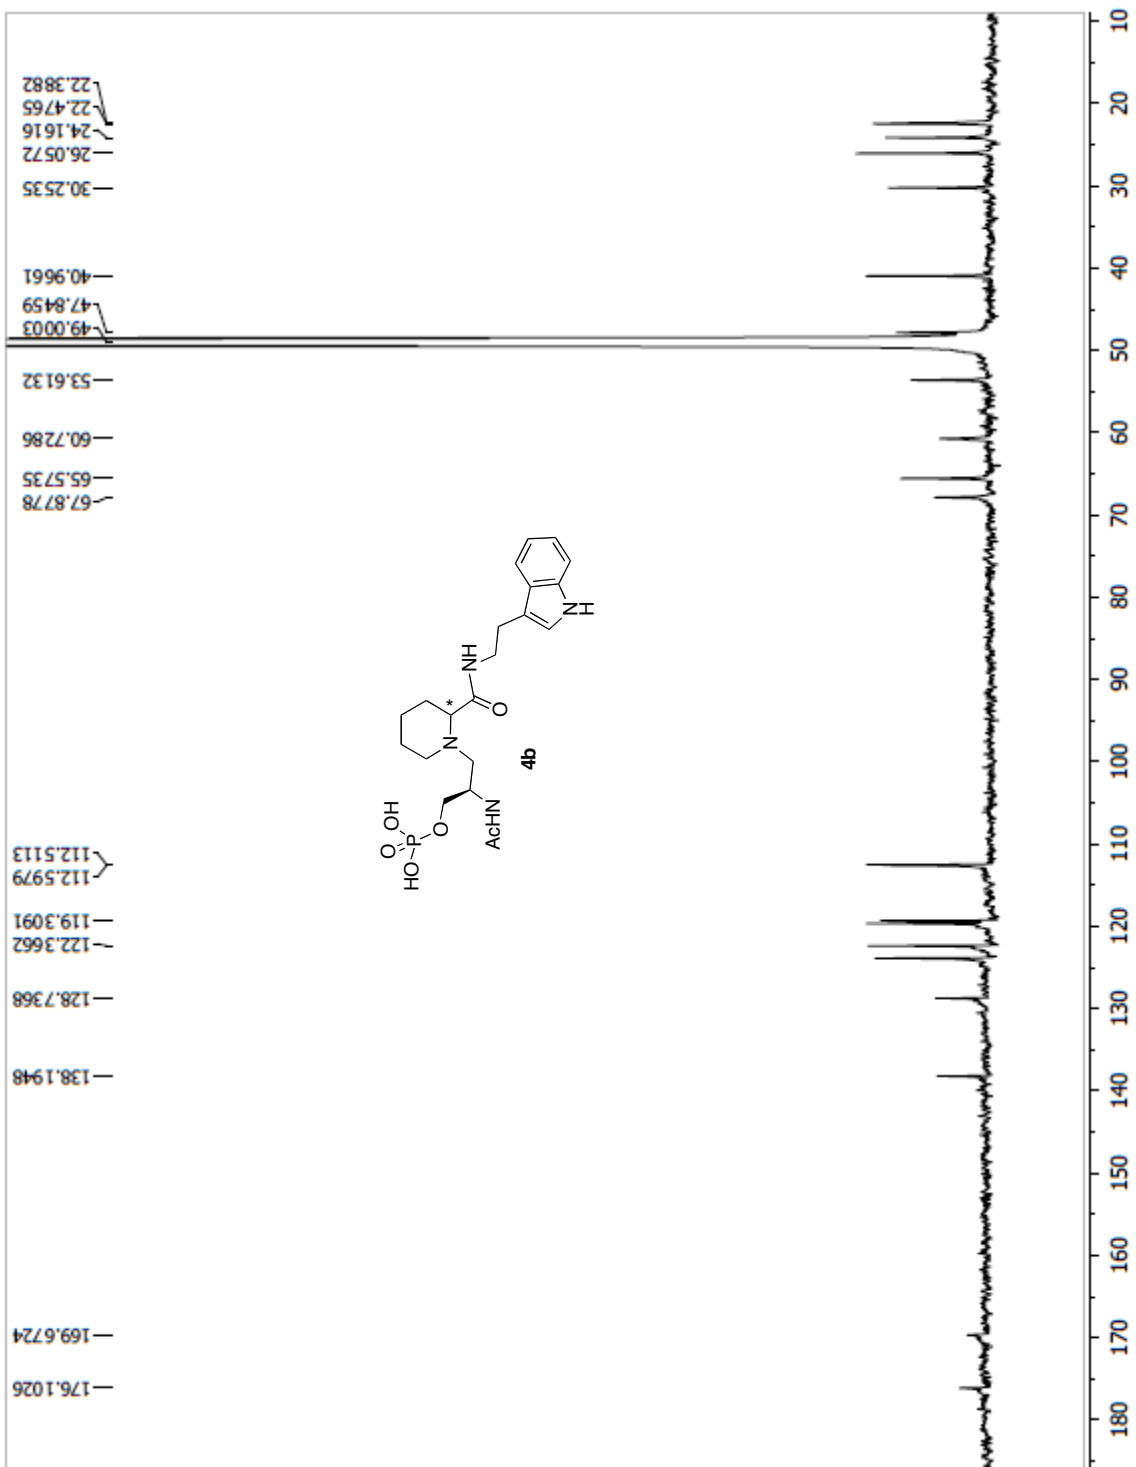

$^{31}\text{P}$  NMR

1.637

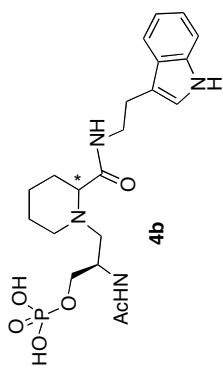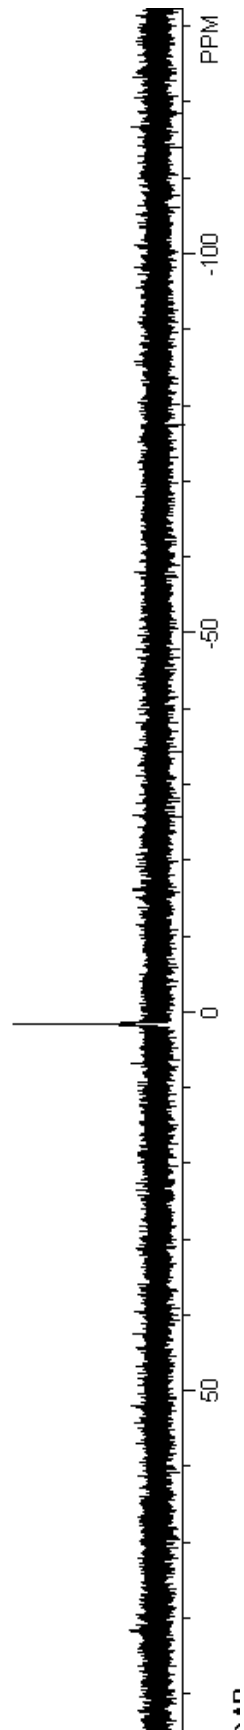



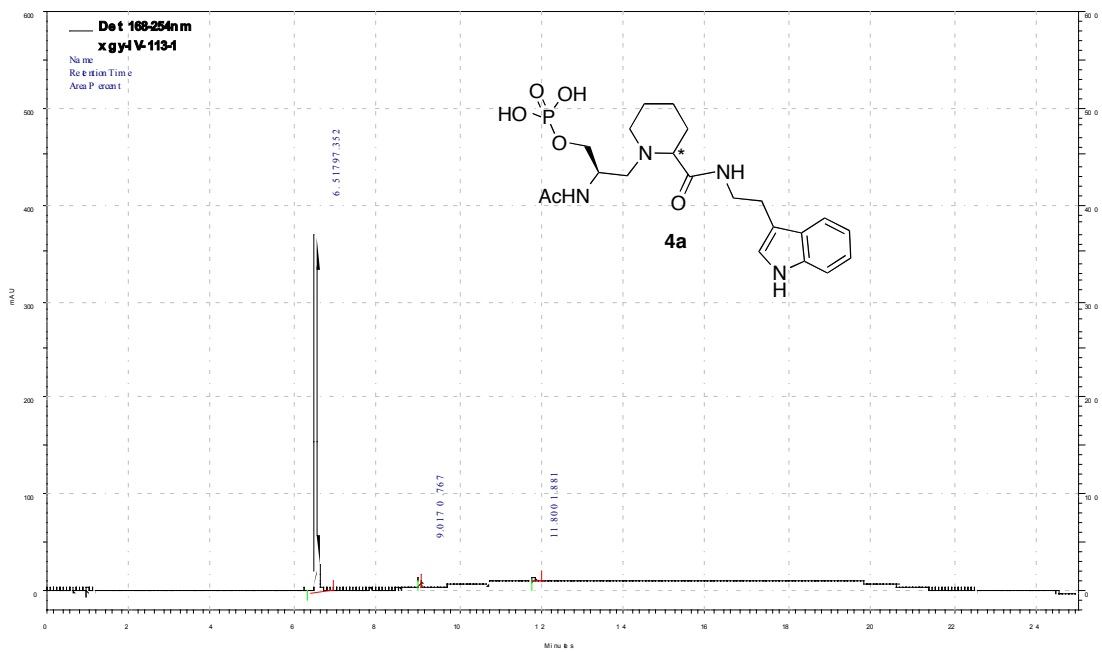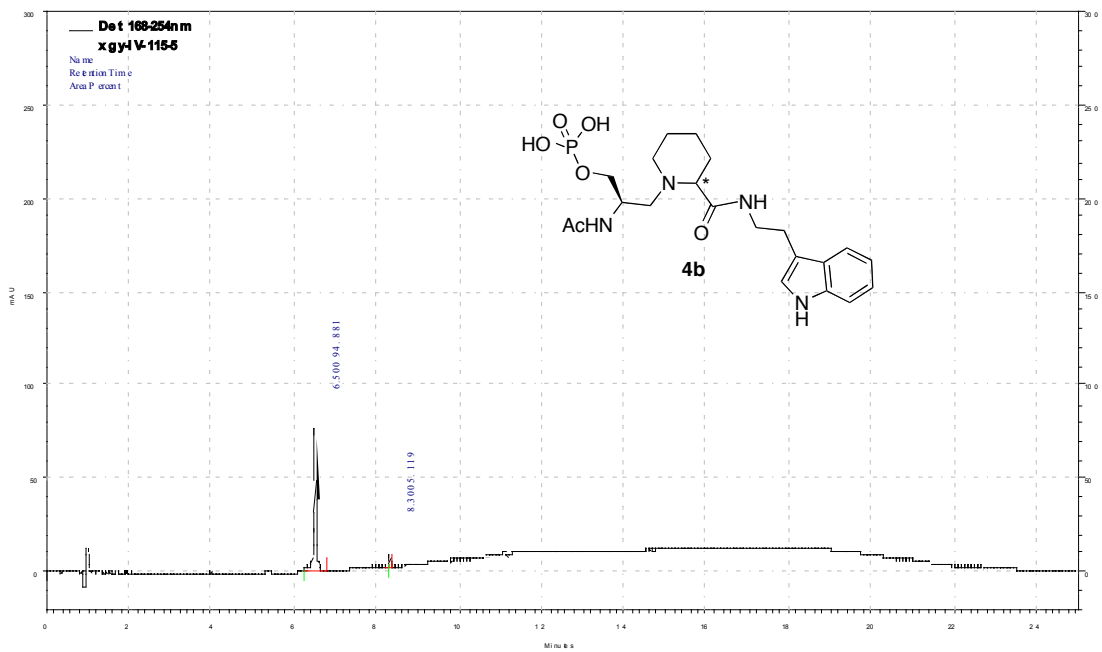

Supplement: NIHMS332181-supplement-1_si_001.pdf [file NIHMS332181-supplement-1_si_001.pdf]
